# Supplementary material for: Candidate Chemosensory Genes in the Stemborer Sesamia nonagrioides
Source: PubMed Central journal article supplement — Int J Biol Sci. 2013 May 21;9(5):481–95. doi: 10.7150/ijbs.6109 (PMC3677684; doi:10.7150/ijbs.6109), 2013-05-21

# Supplementary material S1

## Fasta file of *S. nonagrioides* predicted protein sequences and corresponding transcript sequences

>SnonGOBP1  
MQEYVVRALVLLSVAGALADVNVMKDVTGLGFGQALDKCRQESDLTEEKMEEFFHFWRDFKFEHRELGCAIQCMSRHFNLLTDSRRMHHTNTEQFIQS  
FPNGEVLAQQMVLMIHSCEKQFDHEEDHCWRILHVAECFKQECVSKGVAPSMEMMMTEFIMEAEAR

>SnonGOBP2  
MTTKCSLLLVVIAAVTSSVMGTAEVMSHVTAHFGKALEECREESGLSAEVLLEEFQHFWRDFEVVHRELGCAIICMSNKFSLQLQDDSRMHVNMHDY  
VKGFPPNGELLSQKLVDLIHNCERQYDSIPDDCDRVVVAACFKVDAKAAGIAPEVAMIEAVMEKY

>SnonOBP1  
MMKNSVVCLYFVAVMAVFNWVKCMSDEEKAVLETLPIVEGCASDYGLTNEDEFKKHENIDDDNFLPFKKCLLQKLEIMDETGKYNSDAISKSIVDY  
TGDKEQAKKFKQFDSCFRKNGNNDGDDEASQMKRVFVFMFKCFKEMEE

>SnonOBP2  
MLLIKVFVKLILVAMCEAMTKQIKNTGKMMRKTQPKNNVEDDKIDPIAKGIFIDEKVKCYMACIMKMANTIKNGNFNEAALKQADLLLPEVK  
EPAKEAIIACKKAADGHKIDICDVSFHITKCIYNQNGIFYFP

>SnonOBP3  
MKSFTVFCVVLVAGIHAANVTLPNPQKDKARQIGAEIKETGVTTEILAEAKKGIPEDESLKFKTYCFFKKAGIIDNDGKLNIDVALAKLPPGVDKDDA  
KKVLEDCSKSGKEPQDTAFEIFKCYHAGTKTHILLTDA

>SnonOBP4  
MKLLVFAACILLAQALTDEQKEKLLKHRTECLTETKVEEQLVNLKGGDYKTDNEALKKYALCMMVKSELMTKDGKFKKDVVALAKVPNAADKPT  
VEKLIDACLANKGNTQQTAWNYYVKCYHEKDPKHAIFL

>SnonOBP5  
MLKFTCLALCVVAASISRVYAGEEKAAFREAIKPIIECSKEHGVSTDEIHSAKTAGNAEGIKPCLGCVYKAAVINDKGEYDVTALLKLLKFFVPD  
EEKYAKLAEVAKKASVNDKPVTDGEAGCERAALLTACFLENKAEAFI

>SnonOBP6  
MSKFTCIVLCVVAASLTKVSHAVTEEKAFAFHEVMEPIVDECAKEHGVSEAEIKAAHEAGSADSIKPCXLAMYHEKTEMLDSKGLFDAEKSLSKLLKY  
VKNDEEFAKYEIEGKSCMSVNEKAVSDGEAGCERAKLIIDCFLVXHKADVPF

>SnonOBP7  
MFTGTLPVVLCLCAVVYGGKDKPVFSDIEKIIQTVHDECVGKTGVAEEDITNCENGIFKEDPKLKYMFCLEEASLVDDDGTVDYDMLVSLIPDEYY  
ERTTKMIFSKHLDTDPDKCQRAFEVHKCSYGGKDPFLYFL

>SnonPBP1  
MADSRWVAFSICVIIMTSSVMSSKELVSKMSSGFSKVLQDCKAELNVGHEHIMQDMYFNFWREYELVNRDLGCMVMCMASKLVLVGGDQKMHHG  
KAEEFAKSHGADDELAKQLVGIHACETQHQAIEDPCSRTELEVAKCFRSMHELKWAAPTMEVAIEEIMTAV

>SnonPBP2  
MALHRSPIMSARLALVLIASLFIIVKCSQEVMMKNLTHHFSKPLEDCCKEMDLPDSVITDLHNFWKEDFEFTSRHTGCAILCLSSKLELLDPDLKLLHHGK  
AQEFAQKHGGADEAMAKQLAGLIHGCMETIREPADDPCVRAQNVVMCFKAKIHELNWAPSLDLIVGEVLAEV

>SnonPBP3  
MRSNNIIFSVLLMAVGVREIEPSKDAMKYITSGFVKVLEECKELNMNDHIIADLFHYWKLDTYLLNRDTGCAIICMSKLLDLLDANGRMHHGNAKEF  
ALKHAGDEVAGKIVDIIHDCCKFERDDDECLRVLEVAKCFRTGIHELWDQPNVEIINEVFTEI

>SnonCSP1  
MMKFVLLLCVMVAAMAEKYTDKYDNIDLDEILSNKRLMAYVNCVLDKGGKCSPEGKELKDHLSDAIETGCTKCTDAQQKGTYRVEHLIKNELDI  
WRELCAYDPTGTWRKKYEDRAKANGVIPE

>SnonCSP2  
MKVVLLALCLALGVLAQDKYESANDDFNIKEVLENDRLLTAYSCKLLGTGPCTPEVKQVKDKLPEALETRCAKCTDKQKEMGKTLAQEVKKNHPDI  
WKQLVAKYDPOGKYQQAQWDFLQE

>SnonCSP3  
MRVLIVLACLIVMAFAADKYNSKYDNFDVETLISNDRLLKAYINCFLDKGRCTPEGSDFKKTLPETIACTCAKCTEKQKTNRKVIKAIQKHPKEWDD  
LVKKNPSGKNXANFDKFIQGS

>SnonCSP4  
MYSALATMLLIYLTIQSNATETSTYTKYDGLDLEILNNERLLNGYVNCMLDLGPTADGKELKKNIPDAIENDCKKCTDRQRDGS DRVMMHYLIDHR  
PDDWVWLEKKYNSDGSYKLYLSSKTTEDNSVTNVSKSEEDTKNDSKE

>SnonCSP5  
MNSFIILCLFGLVVAVARPDTTYTDKYDSVNLDEILGNRRLTPYLKMLDQGKCTPDGKELKSHIREALEEDCAKCTKTQRDGTTRVLGHLINHEK  
DYWNQLKAKYDQSYSSKXEEELRTLKQ

>SnonCSP6  
MNFLVLSIVVTLAAFAATETYTDRYDHINDEIENRLLVPYKCTLEQGRCTPEGKELKAHIKAMQTACSKCTEKQKKGARKVVKHIKAKEQDYW  
KQIIAKYDPENQYSETYEAFLAEKE

>SnonCSP7  
MQFKYAILLCCVAVVVAQTQRPVSDTALEDALQDKRFIQRQLKCALGEAPCDPIGKRLKTLAPLVLRGACPOCTPQETKQIQRTLVYVQRNFPQTV  
GQNSPPIRGHIYKVCIGNMIG

>SnonCSP8  
MKSIVLVCVLSVAVMALARPEDAQYTDRYDNVNLDEVLSNRRLVPYVCKVLDGKCAPDAKELKEHIREALENKCAKNEAQKGTTRRVIGHLIN  
HEADYWNQLTAKYDPERKFTAKYEKELKEITA

>SnonCSP9  
MKAVICLALVVAVARPEEQYTSKYDGTNIPEVLANERLLHSYKCGLDLKGKCTEGKELKSHLKEALETHCAKCTDKQKEATRLVIKHLINNEADY  
WKQLSDKYDPEGKYAXKYDELKTVS

>SnonCSP10  
MPKYDQRYDYLVDVAIFTNKRIVRNVVDCLINSVRCCTPEGKALKRILPEALRTKRCIRCTERQKRAAVKVIKRYEYEPDEWSKLASRWDPDGFTRYF  
EFLAKEHFNTIPGSGSAIPTSAPLPPRNPMPPTIASPAGPTVPTPPKAILNRFDDGELMQGSSSVGMTPRPMQTATTPRTTMMKPANTKPIPRPT  
MTTWAGAASNTQPTRFLRPSDDLPPYPFHSHNTH

>SnonCSP11

MKLLIVLALVVLAVASPDGDHYDSKYDSFNVDELIQSPRLLKSYAHCFIGDGKCTPEGKEFKGWPEATTSSCGKCTEKQKVLVAKFIKAIKEKFPPEY  
GALVKKSDPEGTHGGDLQKFIDKYGS  
>SnonCSP12  
MKFVCIVLLAVIAVQAQYSTENDNLIDALVANEESFKSYLGCFLDRVTCDAVPAEFKFDIPDAVKTTCCKTDAQKQIFHKFLLGLKEKLPDSYEAF  
KNKYDPGNEYFTALEAAVANS  
>SnonCSP13  
MKADCVFLATLSVMVAADFYDSKYDSFDVQPLENDRILLGYSKCFLDQGPCPTDAKDFKKVIPEALETTGCGKCPKQKQLIKSVIKAVIDRHPDTE  
QLSEKYDKDRKFESFDKFLAEE  
>SnonCSP14  
MKLIIAVALLCMVAMSWGQRTSTYTDKWDNINVDEILESERLMKAYVDCLLDGRCTPDGKALKETLPDALENECSKCTAKQKTGSDKVIHRLVNR  
PELWRELSTKYDPDHIYQDKYKTQIESVKQ  
>SnonCSP15  
MINLNKCSFRGSLILTYLFLVTLVAQDKFYDRRYDYEIDTLIQNRLLRKYLECFLWKGPCPTPIGRVFRQLPEAVSTACKCTXSQRRLARKAFNAFR  
KYFPEXYVELMKRLDPKNKYEAFAEKAXNA  
>SnonCSP16  
TDGQLDQILADKNMMQRHIKCALGEGPCDPVGRRLRTLAPLVLRGACPCSMQETRQIRRTLAFVQRNYPWEWAKIVRQYG  
>SnonCSP17  
MKNWLLCLCVLTVVVSQGANRYENFNADAIHQNDRILLAYKCVMDKGPCTRDGKNFRVLPETLSTACGRCNPTQKAIVRTLLGLIKSKSEPRF  
MELLDKYNPDRSNRDLYNFLVTGN  
>SnonCSP18  
MNALLIAVFALVAPSALAYDEIYDKIDVDKILGDDALFTTYINCMLDKGECTVEHSADFKLLPEVIATSCGKCSPIQRQNRKTVKALSEKKPEEFTQF  
RAKYDPKGEHEKSFSFAVMGTD  
>SnonCSP19  
MKTILALCLLVAVCAKPEATYDSRYDNFDVESLVGNTRLLKSYGHCFLGTGHCTAEGSAFKKQIPDALRTGCSKCSKQRHLIRVVVKGFTKTPDI  
WNQLVKKEDPTGEYKESFTKFLNSSD  
>SnonOrco  
MMTKVKAQGLVSDLMPNIXMQAAGHFLFNHSEENAGMSNLLRKYASVHAILISVNFACMGINMAQYSXEVELTANTITVLFTHTIKLAFFALN  
SKSFYRTLAVWNQSNHPLFEXESDARYHQIALTKMRKLLYFICGTMCLSVSVWVTLTFFGESVRLITSKETNDTLTEVAPRPLKAWYFPNMGTTYYI  
IAFAFQVYWLLFAMAIALMDVMFCWSLIFACEQLQHLKAIMKPLMELASLDTYRPTAELFRASSTEKSEKIPDVTVDMDIRSIYSTXQDFGMLRGA  
GGRLQNFQGNxxNPNGLTPKQEMLARSIAIKYWVERHKKHVRLVASIGDYGTLALLFHMLVSTITLTLAYQATKINGINVYAFSTIGLYCYLQGVFH  
FCIFGNRLIESSVMEAAYSQWYDGSSEAKTFVQIVCQCQKAMSISGAKFFTVSLLDFASVLGAVVTFYFMVLVQLK  
>SnonOR6  
MILRKFLFENEPVLGITTPSDYDIKILRFVTLVINSWPRREIGEPEPTCQTVCLKYFHLWLNIFTLGCGISYVIHKKDDLDFLEVGHMYIIILMNVVKSRL  
TLTFSTERYQVAKFLTKVHLFFYKDRSEYAMKTHKFIHFVSHLFTLFLAQLMAGLSLFLNIPMYSNFDAGRYNTDGLQNSTFEHSLYFPYPNTSTD  
MKGYIVVCIHWHFFSYMCAWFCMFDLFLMLVFNLWGHFKILNNTLNDPRPSSSNFMLENGFLIHAKEYSKEELLQVSKKLEECVYHREIVNFT  
DKMSDVFPGPMLFVYVLFHQASGCXLLXECQXTAQUALIRYPLT  
>SnonOR8  
MEKHQVDCFKINMKFWRFLAIWPGNDASRSYKYSKAFIITFVYVYVLFVSYNFIYFLPRRLDIFIDDLVYFYTDCSVLSKVLTYLFFRDKIVQILDVLESEI  
FQPDAAEGKAIIEKAKFNKLYWKAFAFMSITNGTLLSQIFVHSHKXTELLXVCSYGFSEAFRNMVYPLFYQSLGITLHMLYVNVVDTFFLGLL  
VFTIAQLEILDLLKLRKVTDENQFDDAEEM  
>SnonOR10  
MAVXNTTLFLGRPKILSAHGVPWHPNNYIILRKLMLFIMWTQYSFLLFEIYIVDVWGDIDEVSEASYLLFTQASLCYKTTTFMVNKNLLELLGIM  
DCEIFEPKSAEHEKILAAQARKIKRLCLFFLTSATTTCTLWAMIPLFDDASKRSFPFRWMPVTPKSPGYELGYLYQMYSIYISAFVISVDSVAVCMIMF  
GCAQLEIMDNKIKQHVIDSAQTEETRKLKIKNNKYLVDCKQHQCVERFMQLCENNCHANIFFQLSGTVAIICNIGLRISIVEHNSVQFFSMINVMVTM  
LSQLFLYCWCWGHETIRSENLEWLYQCPWYEQDTKFNRALFIAMERMKPIFKAGHYISLSPRTFIAILRCSYSYFAVLNRVNTD  
>SnonOR12  
MSESTIEQAKREINESLVLSTFCMRRIGLSLVQDPKRSAYLRQKMLLITSVCGICYHVFSEIVFIGLTLANSRVEDVVPFHFTFGYALSIAKVFVLY  
KQDVFQRLLNELAGWMPPLEKEAQLIKNRSALALRITHRWYFFMNISGVWYFNLTPIVIYLLGLIQGKDDKIGYVWSSWYPFDKHQTFMHVAVYLF  
EIFAGQTCVWIMVSTDLFSAMASHISIMLRLLKRRLELVGTADKDHQEVLDGDKLHQRLLIRYCNLENAFSLSNFVNIMLSSVNICCVFVIVLLEPLL  
EISNKLFLGSAIIGMLCWYADDIFHANADVAAVYNSVWYRTPNRCRRALLFLIQRQAQPIAFTAMGFTNISLVYTSAILTRYSYFALLYTMYSN  
>SnonOR14  
IMSFLCSTTFCMLDLLFLVFNWGHKLKILLHDLTFPLPANNKTLMDCRSVTVNTGMYSDELKLEKLRKCIDYHRHIKNTDEMSDTFGPLLS  
YYMFHQVSGCLLLECSQMTAEALARYLPLAFIVFQQLILLSVIFELVATTSGLKLDVYVGPWQYMDTKNRKIVSIFLYNVQEPNLVKAMGVVDVG  
VTTMATILKTSLSYFTFLRSL  
>SnonOR15  
MLSSLRNFFNIEPQEGVTCSEAYPYLILRLHLLSVISCWPLKILDPLDTVAIRRRKIWVSQRFFHMFICLICVFGGVTYVLLHKKSMTFELGHLIYLLM  
NAVIFSRITLTCYNDEYVVVAREFLEKXHLFYKDRSEYSMKIHKQVHRISHLFTLCLVCQMLAGLFLFNVTMNNYSAGNYARGGLQGNVYDHA  
LYFSNPFPTSNDLKWIYAYNFYNGWISYLCATWFCMHDFLSLMVFHMWGHFKILLYNDNFPKPTTKTSFILEGFTTINYEMFTPNEQKNVSDQLHE  
LIDYHRSIVNFTDKMSEVFGPMLFAYYGFHQTSGLLLECSQMTAALTRYLPLTVILFQQLIQLSIHELIGSISDRKNAVYVGPWESMDTRNRRTVA  
FFLMNVKEPVHVKALGLADVGVTSMTAILKTSISYFTFLNSI  
>SnonOR16  
MSLRKFLLENEPVVGITTPSDYKYIKILRFMLVISSWPRKEIGEPEPNYQAIFFKYLYLCITMSCTFGSVSYVIIHISELSFLEVGHMYIIILMTTVNMSRVIT  
LY  
>SnonOR17  
MSQAYKTYDSLKQDFGEMDFVSNXGVKLFYIPFIDRSKIITNCYYLICGLLFTTIQLXVTLFLICFXNFDWFEIINVPNIGVCLMILNKYSKIHNNRDL  
YDEIFKHFRFDLWEAVSDTIEHKILNQYQTTRILIRFVYTYTIGLTIIVDLLPRIIMVYQNRILREEKQYLYPYNGWYYPFDKNLWYNTVYIWESFMTT  
MVIFIDLNVNMLHISFTRCIEMKILGSTVEGLVTNEDVVKIKEGENMENTHIGIRNKLKFIISKHQFLAKITAKLDIVLGDEMFLAYALGSVFLGLTAFT  
ATVVDDLKYSVRYFSFFSLLVEVFFECTMGQLLIDHSYKLEKPSISSNWAYADSDTKKMMQIFLMRSQKPLEYSAKGYLTMNLETFSGCSLSYQFFN  
LXRTAYSE  
>SnonOR22  
MRFQIIRDFLLKESFDFRDPDINLYNHPQLRIFLAMKGVFFSNRNLRLIWAIPAICILLSIVAMTLEEIFIYRGVSIRDYSFATECFYVWVILGCIPTVYCSIL  
AKTDQIRDIVEKMNEDFIVCSLGPYRKPFLLETQLLIWQLCFAWIFFASFVGSFLMMLPVIGLLYQSLFATIDENTKRPLQFPMWLPHDDPYRTPNYEM  
FLVMQMSLCIIFVQAFVYTYTLLHILLHYAIMNMIKIDFSVIFEGLDSEVALLPRHDERRVKTQLILNARIGNIVTAHLSVFSAVTTVSSVYGLPLVYQV  
SFSSIAICLIAYQIAEKLNXTLDILFCLLGAACLQLWIPCYLTMIRNKAFVGDAGWTCGWHEPGLMIRSDIIIIILRAQQPVTIKFIGLPHVQLETFS  
SCMSSSYFNMLRQYSK









ATACAGTCCTTCCCAATGGCGAGGTGCTGGCGCAGCAGATGGTGTGATGATCCACTCATGCGAGAAGCAGTTCGACCACGAGGAAGACCACT  
GCTGGCGCATCTGCACGTGGCCGAGTGCTTCAAGCAGGAGTGCCTGTGCGAAAGGCGTGGCGCCCTCCATGGAGATGATGATGACGGAGTTTCA  
TATGGAGCGGAGGCACCG

>SnonGOBP2

ATGACTACGAAGTGCAGTTTGTGTGGTGTGCATAGCGGCTGTCCAGCTCGGTGATGGGGACCGCCGAGGTCATGAGCCATGTTACCGCACA  
TTTTGGAAAGGCCTTGAAGAGTGCAGAGAAGAGTCAAGGTTGTGGCTGAAGTCTGGAGGAGTTCAGCACTTCTGGCGGAGGATTTTCGAG  
GTAGTGCACCCGAGCTGGGCTGTGCCATCATCTGCATGTCCAACAAGTCTCTCTGTCAGGACGACAGCAGGATGCACCACGTCATATGC  
ACGACTATGTGAAGGCTTCCCTAATGGTGAACCTTTCTCAAAAAGTGGTGGATTTGATCCACAAGTGTGAGAAGCAATACGACAGTATACCA  
GACGACTGCGACCGCTGTGAAGTTCGACGCTGCTTCAAAGTGGACGCCAAGGCGGCTGGCATAGCACCCGAGGTCGCTATGATCGAAGCCG  
TCATGGAGAAGTAC

>SnonOBP1

ATGATGAAGAATAGTGTGGTGTGTCTATATTTTGCAGTGTGGCAGTTAATTTTGGAACGTTAAATGCATGTCTGACGAAGAAAAAAGGCAG  
TCTTGGAGACACTAACACCCATTGTAGAGGGATGCGCATCTGATTACGGTCTTACTAATGAAGATTTCAAGAAACATGAAAACATCGATGATGA  
TAATTTCTGCCTTTAAGAAATGCTTACTGCAGAAAAGTAAATTTGATGAGACTGGAATAACAACATGATGAATAAGCAAAATCAATT  
GTTGACTACACAGGCGACAAAGAACAAGCTAAGAAATTTAAAGAGCAATTCGATAGCTGTTTTAGAAAAATGGAATAATGACGGTGTGAT  
GAAGCATCTCAGATGAAGCGGGTCTTCGTTATGTTCAAATGTTTTAAGGAGATGGAAGAA

>SnonOBP2

ATGCTCCTCATTAAATTTGTGAAGTTTTGATATTGGTTGCAATGTGTGAAGCAATGACGATGAAACAAATCAAAAATACAGGCAAAATGATGA  
GAAAAACATGTCAACCAAAAAATAATGTTGAAGATGACAAAATCGATCCGATTGCCAAAAGGAATCTTCATAGACGAGAAAGAAGTAAAGTGT  
ATATGGCTTGCATAATGAAGATGGCTAACACGATCAAAAACGGTAACTTTAATTTTGAAGCTGCCTTAAAGCAAGCTGATTTATTGCTACCTGAT  
GAAGTAAAGGAACCTGCGAAGGAAGCCATTATAGCTTGCAAAAAGCTGCGGATGGACATAAGGATATTTGCGACGTATCATTTTCATACCA  
AGTGTATCTACAACAGAACCCGGGCATATTTTACTTTCCG

>SnonOBP3

ATGAAATCGTTCACAGTATTTTGTGTAGTCTAGTGGCTGGGATTCATGCCGCAATGTAACCTCTCTCCAAACCAAAAAGCAAAAGCCCGTCA  
GATCGGAGCTGAATGCATCAAGAAACCGCGTCAACCACGAGATCTAGCCGAAGCGAAGAAAGGCCCATCCAGAAAGATGAAAGCCTGAA  
GAAATTCACCTACTGCTTCTCAAAAAGCAGGAATCATCGACAATGATGGCAAATTTGAACATTTGATGTGGCGCTCGCAAACTCTCTCTGGCG  
TTGACAAGGATGACGCCAAGAAAGTGTGCGAAGACTGTAAGTCAAGACTGGAAGGAGCCCAAGGACACCGCTTCGAAATCTTCAATGTTA  
CCACGCGGAACAAAAGCCCATATTTTGTGACCGATGCT

>SnonOBP4

ATGAAGTGTACTTGTATTCTGCTGCCTGCATTCTGTTAGTCAAGCTCTCACAGATGAGCAGAAGGAAAAGCTTAAAGAAACATCGCACAGAATG  
CCTTACTGAGACCAAGGTGGAAGAACTAGTTAACAAGCTGAAAGGGTGGTACTACAAGACTGACAATGAAGCCCTGAAGAAGTATGCCCT  
CTGCATGATGGTGAAGTGGAGCTGATGACCAAGGACGGCAAGTTCAAGAAGGACGTTGCTCTGGCTAAGGTTCTAATGCAGCTGACAAACCA  
ACAGTCGAGAAGCTGATAGATGCTGCTGCCAATAAGGGCAACACACCTCAGCAGACTGCCTGGAACACTGCAAAATGTTACCATGAGAAGG  
ATCCCAAGCACGCGATTTTTTTG

>SnonOBP5

ATGTTGAAGTTCACCTTGTGGCTTTGTGTGTAGTGGCTGTAGCATTAGCAGGGTTTTATGCAGGAGAAGAAGAAAAAGCGGCTTTCCGTGAAGC  
CATCAAGCCTATCATAGAAGAGTGTCTCAAAGGAGCATGGAGTCACTACTGATGAAATTCATTCTGCTAAGACAGCCGGCAACGCTGAGGGCATT  
AAGCCTTGTCTTCTCGCTGCGTCTATAACAAAAGCTGCAGTTAATGACAAGGGGGAATACGATGTAGATACCGCTCTGCTTAAATTTGAAGAA  
ATTCGTGCCGATGAAGAAAAATACGCTAACTAGCTGAAGTTGCAAAGAAATGCGCTTCACTGAAATGACAAACCTGTGACTGACGGAAGC  
CGGATGCGAGAGACTGCGCTGTGACAGCTGCTTTTTGGAAAAACAAGGCCGAGGCCTTCATA

>SnonOBP6

ATGTCGAAGTTCACCTGCATCGTCTTATGTGTTGTGGCTGCGAGCTGACCAAGTTTCCCATGCTGTACAGAAGAAGAGAAGGCTGCATTTCCA  
TGAGGTGATGGAGCCCATAGTAGACGAGTGTGCTAAAGAGCATGGCGTAAGCGAGGCTGAAATCAAGGCAGCGCACGAGGCGGGCAGTGCCGA  
CTCTATCAAGCCCTGCTxTCTTGAATGATCATGAAAAACTGAAATGTTGGATTCCAAGGGCTGTTTGTGATGAGAAAAATCACTTAGTAAGC  
TCAAGAAATACGTAAGAAACGACGAGGAGTTGCCAAATACGAAGAAATTTGAAAAATCTGCATGTCTGTGAATGAAAAAGCTGTGAGTGTG  
GTGAAGCCGGCTGCGAGAGGGCCAAAGCTTATTATTGACTGCTTTTTGGTAxxACACAAGCCGATGTACCCTTC

>SnonOBP7

ATGTTACAGGGACGCTGCCCGTGGTCTGTGTTTGTGTGCGCTGTTTACGGCGTAAAGACAAACCGGTTTTACAGTACGAAATCAAAGAAAT  
AATACAAACAGTTCACGACGAGTGTGCTGGTAAAAACAGGGGTGGCAGAGGAGGATATAACGAATGCGAAAAACGGCATATTTAAGGAGGACCC  
GAAATTTGAAGTGTATATGTTTTGCTGCTGGAAGAAGCGACCTCGTAGACGATGATGGCACTGTGGACTACGACATGCTGGTCACTTATGATA  
CAGACGAATACTACGAGAGGACAACCAAAATGATATTTTGTGTAACACTCTCGATACCCCGGATAAAGATAAATGCCAGAGAGCATTTGAAGT  
ACACAAATGTTCTTATGGAAGGATCCAGAATTATACTTCTTATT

>SnonPBP1

ATGGCTGATTCAAGATGGTGGTTCGCGAGTTTCACTCGCTCATTATTATGACAAGTTCGGTGTGCTTCCAAGGAGCTGGTCTCAAAAATGAG  
TTCCGGGTTCTCGAAGTTTTGGATCAGTGTAAAGCTGAGCTGAACGTGGGCGAACACATAATGCAAGACATGTACAACCTTCTGGCGGAGGAG  
TACGAGCTGGTGAATCGCGACCTGGGATGCATGGTGTGATGTCATGGCTCCAAGTTGGACCTGGTAGGAGACGACCAGAAGATGCACCACGGA  
AAGGCCGAGGAGTTTCCAAGAGTATGAGCTGATGACGAGCTGGCTAAGCAGCTGGTGGGCATCATCCATGCCTGCGAGACGACACCAA  
GCCATCGAGGATCCCTGCAGCCGACGCTGGAGGTGGCCAAGTGTCTCCGCTCGAAGATGCACGAGCTGAAGTGGGCCCCGACCATGGAGGTGC  
CCATAGAAGAGATTATGACAGCTGTT

>SnonPBP2

ATGGCCCTGCATCGATCGCCATCATGTCCGACGCTTGGCGCTGGTACTGATCGCCAGTCTGTTTCATCGTGTGAAATGTTTCAAGAAGTCA  
GAAGAATCTGACCATCATTTCTTAAAGCTTTGGAAGACTGTAAAAAGGAGATGGACCTCCCGGACTCTGTGATCAGAGATTTACACAATTTCT  
GGAAAGAAGACTTCGAGTTCACGAGCAGACATACAGGCTGTGCCATCTTCACTTCAAGTGGAACTGCTCGATCCAGACCTTAAGTTG  
CATCACGGAAGGCGCAGGAGTTTCGCGCAGAAACATGGCGCTGACGAGGCCATGGCGAAGCAGCTGGCAGGCTGATCCACGGCTGTATGGAG  
ACAATCCGCGAACCGGCCGACGCCCTGCGTGGGGCTCAGAACGTAGTTATGTGCTTCAAGGCCAAGATACATGAGCTGAACTGGGCGCTA  
GCTTGGACCTCATCGTGGGAGAAGTCTTGGCTGAAGTC

>SnonPBP3

ATGAGAAGCAACAACATCATTTTCTCGTCTTGTGATGGCAGTGGGTGTGAGAGAGATAGAACCATCGAAAGATGCTATGAAATATATCACTT  
CAGGATTCGTCAAGTTTTGGAGGAGTGAAGAAAGAGCTTAACATGAACGATCACAATCATAGCCGACTTGTCCACTACTGGAAGCTGGACTA  
TACCCTGCTAAACCGGACACCGGCTGCGTATCATCTGCATGAGCAAGAAAGCTGGACCTTTTGGATGCCAACGGGAGGATGCATCATGTAAC  
GCTAAGGAATTCGCTCTCAAACATGGCGCCGGAGACGAAGTGTGAAAAATAGTGGACATCATCCAGACTGTGAGAAGAAGTTTCGAGCGA  
GATGACGACGAGTGTCTGCGAGTGTGGAGGTGGCCAAGTGTCTCCGAACCGGCATACACGAGCTGGACTGGCAGCCCAAGCTCGAGGTCACTA  
TTAACGAGGTCTTCACTGAGATA

>SnonCSP1

ATGATGAAGTTCGTCTGCTGTGTTATGGTGGCCGCGTGTGGCCGGAAGAAAAGTACACCGACAAGTACGATAACATCGACCTGGATG  
AGATCCTCTCCAACAACGACTTCTCATGGCGTACGTCAACTGCGTCTGGATAAAGGAAAGTGCAGTCCCGAAGGCAAGGAGCTCAAAGACCA  
CCTTTTCGGATGCCATTGAGACCGGTGCACAAAATGCACGGACCGCAACAGAAAGGGAACATATAGAGTCACTCAGCACTTGATCAAGAACGA  
GCTTGACATCTGGCGTGAAGTGTGCGCTAAGTATGATCCCCTGGCACCTGGAGGAAGAAAGTACGAAGACCGCGCAAGGCCAATGGCATCTGT  
ATCCCCGAA  
>SnonCSP2  
ATGAAGGTAGTTCTACTCGTCTCTGCTCTGGAGTACTCGCACAAAGACAAGTACGAGTCTGCCAACGATGACTTCAACATCAAAGAAGT  
TTTGGAAAATGACAGACTACTGACCGCATATTCCAAGTGTACTGGGCACGGGACCTGCACTCCAGAAGTAAAAACAAGTTAAAGACAAATG  
CCGGAGGCTCTGAAACTCGTTGTGCAAAATGTACCGACAAAACAAAGGAAATGGGTAAAACGCTGGCTCAAGAAAGTGAAGAAAATCACCT  
GACATCTGGAAGCAACTAGTGGCTAAGTACGACCTCAAGGCAAATACCAACAGGCGTGAAGGATTTCTTCAAGAA  
>SnonCSP3  
ATGAGGGTCTGATTGTATTGGCGTGTAAATCGTTATGGCGTTCGCTGCGGACAAAATACAACTCTAAATATGATAAATTGACGTGGAGACGTT  
GATTTCCAACGACAGACTCTCAAAGCATACTCAACTGCTTCTGGACAAGGGCGGTGTACACCAGAAGGATCTGATTCAAAAAGACCTC  
CCAGAAGCGATAGAAACGACATGCGCCAAGTGCACGAGGAGGACTAACATAAGGAAGGATTAAGGGCATTCAACAGAAGCACCC  
CAAGGAGTGGGACGATCTGGTGAAGAAAGACGACCCAGCGGCAAGAACCYGCCAACTTCGACAAGTTCATCAAGGAAGCAG  
>SnonCSP4  
ATGTATTACGATTAGCCACGATGCTGCTAATATACTTGCACATCCAGAGCAACGGCAGGAGACATCGACGTACACAACCAAGTACGATGGCA  
TTGACCTAGACGAGATCTGAACAATGAACGCCTGCTGAACGTTATGTCAACTGCTGTGATGGACCTTGGACCTGCACGGCCGATGGAAAGA  
GTTGAAAAAAGTATTCCCGATGCGATTGAAAAAGTACTGTAAGAAAGTGCACCGACAGACAACGAGATGGTTCGACCGAGTGTGACTACCTC  
ATCGATCACAGGCTGATGACTGGGTGAACTAGAGAAGAAATACAATTAGATGGAAAGCTATAAATTGAAAATATCTATCAAGTAAGACAACCTG  
AAGACAATAGTGAACCTAACGCTCTAAAGTCTGAAGAAGATACTAAGAATGATTTAAAGAA  
>SnonCSP5  
ATGAACAGCTTCATAATTCTGTGCTTATTCGGGCTGTGGTGGCGGCGTTGCCAGGCCGATACCCAGTACACCGACAAAATACGACAGTGTAA  
CTTGGACGAGATCTTGGCAACCGTCCGCTGCTGACTCCATACCTCAAGTGTATGCTTACCAGGGCAAGTGCACACCCGACGGCAAGAGCTT  
AAATCTACATCAGGGAAGCGTTAGAGGAGGACTGTGTAAGTGCACCAAGACCGTGCAGAACTCCCGAGTCTTGGGCCATCTTATCA  
ATCACGAAAAGGACTACTGGAATCAGTGAAGGCCAATACGACCCAGTCCAARTACTCCAGCAAGCAYGAAGAGGAACTTAGGACACTTA  
AGCAA  
>SnonCSP6  
ATGAACCTTCTGTGTGTCAATCGTGTGAACTCTGGCGGCTTCGACGCACTGAAACTTACCGGATAGGTACGACCATCAACATTGACGA  
GATCATCGAAAACAGAAAGTGTGCTGTCCATACATCAAGTGTACTCTGAAACAAGGAAGATGTACTCTGAAGGAAAGGAACTTAAAGCAGT  
ATCAAGGACGCCATGCAGACAGCGTGTGCTGAAAATGACGGAGAAAACAAAAGAAAGGAGCCAGGAAGGTCGTCAGCACATCAAAGCCAAAGGA  
ACAGGACTACTGAAAACGAGATCATCGCTAAATATGACCCTGAGAATCAGTACTCTGAAACATATGAAGCTTTCCTTGTGAAAAAGAA  
>SnonCSP7  
ATGCAGTTCAAATACGCGATATTATTATGTTGCGTGGCAGTGGTGTCCGTTGCACAGACGACGACCCGCGTGTCCGACCCGCGCTTGAAGA  
CGCTCTTCAAGACAAGCGCTTCACTCAGAGACAGCTCAAGTGCAGGCTGTTGGTGAAGCACCCCTGTGACCCCATAGGAAAACGGCTCAAGACTCTT  
GCGCCACTGGTACTCAGAGGAGCCTGTCTCAGTGCACGCCACAAGAGACCAAGCAGATACAGCGCACTCTCTGTCAGTCCAACGAAAACCTCC  
CTCAGACAGTGGGCAAAAATAGTCCGCCAATACGCGGGATAATATAAAAAAGTTTCATGTATAGGAAACATGATCGGA  
>SnonCSP8  
ATGAAATCTACATCGTCTGTGTGCTCTCCGTGGCCGCTGATGGCTCTCGCGCTCCGAAGATGCTCAGTACACAGACCGTTACGACAACGT  
AAACCTGGACGAGTCTCAGCAACCGCCGCTATTGGTGCCTACGTCAAAATGCGTCTCGACGAGGGCAAGTGCACCTGACGCTAAGGAG  
CTCAAGGAGCAGTACAGAGAAGCTCTCGAGAACAATGCGCCAAATGCAATGAAGCCAGAAGAAAGGGAACCCGGCGCTCAGCGGCATCTA  
ATCAACCACGAAGCTGATTAAGTGAACCAAGTACTGACCCAAATACGACCTGAGAGGAAATTCACCGCAAGTACGAGAAAAGAACTCAAAGG  
ATCACGGCT  
>SnonCSP9  
ATGAAAGCCGTGATCTGCTGTGTCCTCGTGGTGGTGGCCTGCTGCTCTGAGAAACAGTACACAAGCAAAATACGATGGTACGAACATAC  
CAGAGGTTTTAGCCAACGAGAGGTTGCTGCATTTACTATCAAGTGCAGGCTGGATCTGGGCAAGTGCACGACTGAGGGCAAAGAACTTAAATC  
TCACCTCAAAGAGGCAATTGAAACTCATTGCGCGAAGTGCACCGACAAAACAGAAGGAGGCTACTCGCTTGTATCAAACATCTGATCAACAAC  
GAAGTACTACTGGAAGCAACTGTCCGACAAAATATGACCCGGAAGGTAAATACGCCAWAAAGTACGAGGATGAACTGAAGACCGTCTCT  
>SnonCSP10  
ATGCCTAAATACGACAGAGATATGATTATTTGGACGTTGACGCGATTTCTACTAATAAGAGACTAGTACGGAACACTCGTGGATTGTTTATGATCAA  
CTCTGTCGATGCACCGCTGAAAGGAAAAGCACTGAAAAGGATACTTCCTGAAGCATTACGGACGAAATGCATCCGATGCACCGAACGACAGAA  
AAGGGCAGCGGTGAAGGTGATCAGACGGCTGAAGTACGAGTACCCAGATGAGTGGTCAAGTGGCTTCCCGATGGGACCCTACTGGAGACTTC  
ACAGATACTTCGAGGAGTTCCTCGCTAAGGAACACTTAACTACTTCCCGGATCAGGAAGCGGATCCCCACATCAGCACCTTTGCTCCTCG  
GAATCCTACGATGCCCCGACTATTGCCAGCCAGCTCTGGACCCAGTCCGACTCCACCGAAACCTGTATACTTAAACAGGTTCCGGAGATG  
ATGGTGAAGTATGACGGGAGTCTTCCTGCTCAGTGGTATGACGCCCCAGCTGACGCCCCAGTCCACTACGCGGAGTCCACTACGCAACATGAAGC  
AGCCAACACTAAACCTATTCTCCAGACCAACTATGACGACATGGGACAGGAGCAGTCCAACACGCGAGCCGACGCTTTTCCACTCCGTCCC  
TCGTGCGACCTCCGCTCTTACTTCCACAGCCATAAACAATCAT  
>SnonCSP11  
ATGAAACTGCTCATCGTCTTACTGTGCTGGTGTGCTGGCTGTCGCTTCGCGGATGGCGATCACTATGACAGCAAGTACGACTCGTTCAACGTTGA  
CGAACTCATTCAAAGCCCCGCTGTTGAAGTCATATGCACACTGTTTTATCGGTGATGGCAAATGTACCCAGAAAGGAAAGGAAATTTAAAGGTT  
GGATTCCCGAAGTACCACGTCATCTTGCAGAAAATGCACTGAGAAAACAAGGTTCTCTGTTGCTAAATTCATCAAGGCTATTAAGGAGAAGTT  
CCCTGAGGAGTATGGAGCACTGGTGAAGAAGTACAGCCCTGAAGGACGACCGTGGAGACCTGCAAAAATTCATCGATAAATATGGATCT  
>SnonCSP12  
ATGAAGTTCGTCTGCATAGTCTTCTGCTGGCCGTCATCGCAGTCCAAGCTCAGTACAGCAGTACGAAACGATAAACCTGGACATCGATGCTTGGT  
GGCCAACGAGGAATCTTCAAGAGTTACCTGGGGTGTCTTGGATAGAGTACCTGTCACGCGTCCCTGCCGAATTCAAAAGGACATCCCG  
GATGCGGTCAAAAACAACCTGCTCAAAATGTACAGACGCTCAGAAAACAATCTCCATAAATCTCTGTTGGGACTTAAAGGAGAAGCTCTTCCAG  
ACTACGAAGCTTCAAGAAACAAGTATGATCCAGGAAACGAATACTTTACTGCACTGGAAGCCGAGTTGCGAACTCT  
>SnonCSP13  
ATGAAGGCTGACTGTGTATTCCTCGCTACATTATCGGTGATGGTGGCAGCAGACTTCTACGACTCCAAGTATGATAGTTCGATGTGCAGCCCT  
TCTAGAAAATGATAGGATACTACTGGCTACTTAAGTGTTCCTTACCAGGGACCTGACGCCTGACGCAAGGATTTAAAAAGAAATTC  
CAGAAGCTCTTGAACACTACATGCGGCAAAATGCAGTCTTAAACAAAAGCAGTAAATAAAGTCTGTAATCAAGGCAAGTATAGACAGACATCTGA  
CACGTGGAGCAGCTCAGCGAAAATACGACAAGGACAGGAAATTTAAAGAATCTTCGATAAAGTTTCTAGCCGAAGAGGACTAA  
>SnonCSP14  
ATGAAACTAATATCGCAGTTGCTTTATTATGCATGGTGGCGATGCTGGGGACAGCGCACCTCTACCTACACAGACAAGTGGGACAATATCAA  
TGTGACGAGATCTGGAGTCAAGGCCCTTATGAAAGCTACGTAGACTGCTGCTGACCGTGGACGATGACTCCCGACGGAAAAGCCCTTA



AAGGAGACTCTCCCCGACGCCTTAGAAAATGAGTGCAGCAAAATGACTGCGAAGCAAAAACTGGCTCAGACAAAGTGATCAGGCACCTAGTG  
AATAAGCGTCCAGAGTTGTGGAGGGAATATCGACCAAGTACGACCCTGATCATATCTATCAGGACAAATACAAGACTCAGATTGAGTCCGTGA  
AGCAG

>SnonCSP15

ATGATTAATTTAAACAAATGCAGTTTTAGAGGATCGTTAATTTTAAACATATTTATTTCTGGTGACAGTCTTGCAGGATAAGTTTTATGATCGA  
AGATACGATTATTACGAAATAGATACTTTGATACAGAATCGTAGGTTGTTAAGGAAGTATTTGGAGTGTTTTCTTTGGAAAGGACCGTGCACACC  
CATAGGAAGAGTATTTAGACAAAATCTGCCTGAAAGCAGTATCAACAGCGTGTAAAGAAAGTACTCCRTACAACGCAGATTGGCCCGAAAGCG  
TTTAAACGCGTTACGGAAGTACTTTCCGGAGGCRACGTGGAGCTGATGAAAAGGCTTGACCCCAAGAACAAGTACTATGAAGCCTTCGAAAAGG  
CTATCRCAAATGCT

>SnonCSP16

ACCGACGGCAATTAGATCAGATCTGGCCGATAAGAATATGATGCAGCGGCACATTAATGCGCACTTGGTGAAGGACCATGTGATCCTGTTG  
GGAGACGGTTCGAACTTGGCTCCGTTGGTGCCTAAGAGGAGCATGCCCGCAGTGTTCGATGCAAGAACTCGTCAAATTCGACGAAACCTCCG  
GTTTGTCCAACGGAATACCTTTGGGAGTGGGCGAAGATCGTGCCTAATGCG

>SnonCSP17

ATGAAGAATTGGCTGCTATGTCTGTGCGTGTGACGGTGGTGGTATCATGCTACTCGCAAGGTGCTAATCGCTACGAGAAGTTC AACCGTGTATGC  
CATCATTCAGAACGATAGAATCTTACTGGCCTACTACAAATGCGTGTGGATAAGGGTCCCTGTACGAGAGATGGAAAGAACTTCAAACGTGTA  
CTGCCAGAGACTTTGTGACCGCTTTGGTGCCTGCAACCTTACTCAGAAGGCGATCGTCCGACGCTGTCTCTTGGCATCAAATCAAAGAGCGA  
GCCTCGCTTATGAACTCCTCGACAAGTACAACCTGACCGTCCAACAGGGATGCTCTTTACAACCTTCTTAGTCACTGGCAAT

>SnonCSP18

ATGAACGCGCTGTGATAGTGTATTTCGCCCTGGTTGCACCCAGTGCCTTGCCTACGATGAAATTTACGACAAGATCGACGTGGACAAGATCCT  
GGGCGATGATGCGCTGTTACGACGTACATTAAGTGCATGCTGGATAAAGGCGAATGTACAGTGGAACTTCTGCTGACTTTAAAAAGTTACTTC  
CAGAAGTCAATAGCAACATCATGCGGCAAAATGCTCACCCATTCAAAGGCGAATGTGAGAAAGACTGTAAAGGCCCTCAGTGAAGAAGAAACCTG  
AAGAATTCATCAATTCGGGGCAAGTACGACCCGAAAGGAGAATGAAAAAGCTTCTCCGCTTTCGTCATGGGAACAGAT

>SnonCSP19

ATGAAAACCACTTAGCCTTATGCTGTTGGTCTGGTGTGTGCGCGAAACCTGAAGCGACATACGACAGTCTTATGACAACCTTTGACGTCGA  
GTCCTTGGTGGGGAACACTCGTCTACTGAAATCCTACGGGCACTGCTTCTCGGCACCGGCCATTGCACCGCAGAGGGATCTGCCTTAAAGAAC  
AAATCCCCGATGCCCTAAGAAGTGGTTGTAGTAAATGCTCGCGAAGCAGCGCATCTGATCCGCGTCTGATCAAGGCTTCCAGACGAAGAC  
TCCCGACATCTGGAATCAGCTGGTTAAGAAAGAGGACCCACTGGAGAGTACAAGAGAGCTTTACTAAGTTCCTTAACTCCTCAGAT

>SnonORco

ATGATGACCAAAGTGAAGGCCAGGGCCTGGTGTGACACTTGTATGCCAACAATAAAGTTGATGCAAGCGGCAGGACACTTTTTATTCAACTACC  
ATTCAGAAAATGCAGGCATGTCCAACCTCCTTCGCAAGATCTACGCGAGTGTCCATGCCATCTCATCTCTGTCAACTTTGCATGTATGGGTATC  
AACATGGCGCAGTACTCTGATGAGGTCAATGAGTTGACTGTAACACCATCACCGTGTCTTCTTCCACCATACCATCAAGCTTGCATTCTTT  
GCTTTGAACCTTAAAAGCTTCTACAGGACCCTGGCAGTCTGGAACCCAGTCAAACAGCCACCCTCTGTTCATCGAATCGGATGCCCGTACCACCA  
GATCGCGCTCACCAAGATGAGGAAGCTCCTGTACTTTCATATGCGGAATGACCTGTTTATCTGTTGTCAGCTGGGTTACTCTAACATTCTTCGGGG  
AGTCAGTCCGCTGATCAAGCAAGGAAACGAATGATATCTCAGGAGGTAGCCCTCGTCTACCTCTGAAAGCCTGGTACCCTGTTCAATGCT  
ATGGGAGGCCACCGTACATCATTGCTTTTGTCTTTCAGGTTTACTGGCTCCTTTCGCAATGGCCATAGCGAACTTAAATGGATGTGATGTTCTGC  
TCCTGGCTGATCTTCGATGTGAACAGTGCAGCATCTGAAGGCTATCATGAAGCGCTCATGGAATTGATGGCTTCTGATGATACGTACAGGCC  
GAATACTGCTGAGCTGTTTCGAGCTTCTGCAACTGAGAAATCAGAAAAATCCAGATACCGTAGACATGGACATCCGAAGCATATATTCAACG  
CAGCAAGACTTCGGCATGACGCTGCGAGGAGCAGGCGGGAGACTGCAGAATTTGGGCGCAGAACTCGAATCCGAACGGTTTGACCCCGAAA  
CAAGAGATGCTGGCCAGTCAAGCATCAAGTATGGGTGGAGAGGCATAAGCACGTTGTGATGATTGGTGGCTCCATCGGTGACACTTACGGTA  
CAGCGTACTGTTCCACATGTTGGTCTGACGATCACTCTCACTGCTCGCCTACCAAGTACTAAGTCAATGGAATAAACGTTGACGCTTC  
AGTACAATCGGCTACTGTGCTATACTCTTGGTCAAGTGTTCACCTTCTGCACTCTCGAATTCGGAATCGACTTATTGAAGAGAGTTCATCAGTCATGGA  
AGCAGCCTACTCTTGCAATGGTACGACGGCTCCGAGGAGGCGAAAACTTCTGTCAGATCGTGTGCCAGCAATGCCAGAAGGCCATGAGCATC  
TCCGGAGCAAGTCTTACTGTATCACTTGATTGTTTGTCTCGGTGCTCGGTGCCGTGGTGACATACTTCAATGGTGTGTTACAACCTCAAG

>SnonOR6

ATGATTTTACGTAAATTCCTCTTCGAAAATGAACCAAGTACTTGGCATCACAAACCCCTCCGATTGACTACATTTAAAATCTTACGTTTACGCTG  
GTCATCATCAACTCCTGGCCTCGGAGAGAAATAGGAGAGCCCGAGCCAACTTGCACAAACGGTATGCCTTAAAGTACTTTCACTTATGGCTCAATAT  
CTTTACCTTATGTGGAGGCATTTCTTATGTAATCATACATAAGGACGATTATCTTTTTGGAAGTCCGGCATAATGATATATTATACTTATGAA  
TGATGTTATTAAGTCCAGACTCCTCACACTGACGTTTTCTACCGAGTACCGACAGGTGGCTAAAGAATTTCTTACAAAAGTCCATCTGTTCTCTA  
CAAAGACCGTCTGAATATGCGATGAAGACTCACAAATTCATCCACTCTGATCTCATCTTTCACGTTATTTCTACTAGCTCAGATGTTAGCTGG  
CCTACTCTCTTCAACCTTATACCCATGACAGTAACCTTTGATGCGGAAAGGTACAATACGGATGGTCTTCCAAAACCTCGACGTTTGAACATTCTCT  
GTATTTCCCTTATCCGTTTAAACAGTCAACTGATATGAAGGATATATTTGTTGTTGATTTCTTCACTGGTCTTTTCATACATGTGCGCCACTTGG  
TCTGATGTTGATCTATTTCTGTTATTAATGGTTTTCAATCTCTGGGGCCATTTCAAAATTCATAATACTCTGAATGACTTCCCAAGACCTA  
GTTCTAATTTCAATTTCAATGTTAGAAAATGGTTTCTTAAATACATGCTGAAAAATTTCCAAAAGAAGAACTATTACAGGTTTCTAAAAAGTTAGAA  
GAATGTGATATATACCTAGAGATGTTAATTTTACAGACAAATGTTGCGGATGATTTCCGGCCGATGCTGTCTGTTACTTGTGTTTCCACCAG  
GCAAGCGGATGCTATTACTCBTAGAATGTTACAAAATACAGCACAAGCTCTGATACGTTATTTGCCACTCACTG

>SnonOR8

ATGAAGTTTTGGAGGTTCCCTGTCTATTTGGCCTGGGAAATGATGCCAGCCGTAGTTACAAAATATTTCCAAAAGCTTTTATTATAACCTTTGTGTT  
GTCATTTACGCTTGTGTTTTCTATAAACTTCTATTTCTTGGCAGACGCTGGACATTTTTATTGACGATTTGGTGTGTTTTATTACTGATTGTTCCGT  
GTTGTCTAAGGTTTTGACGATCTGTTTTTCCGTTGATAAAAATCGTTCAGATTTTAGATGTGCTAGAGAGTGAATAATTTCCAACTGATGATGCTGA  
AGGAAAGGCTATCATAGAAAAGCTAAGAAATTCACAAGCTGTATTGGAAGCTGTAGCATTATGTCGATTACATCAAATGGTACTCTTCTTT  
CACAGATATTTGTGATTTCCAAAAGGSAACAGAACTACTTCTCCWGTGTTGATGTTACGGTTTTTYATCCGAGGCATTAGAAAATATGTTGCTA  
TATCCCTTATATTTTATCAGTCGCTCGGCATAACTTTACATATGCTGTACAATGTGAACGTTGATACGTTTTTCTGGGATTATGGTTTTACAAA  
TAGCCAGCTAGAGATCCTTGATTTAAAATTAAGAAAAGTCACTGATGAGAATCAATTTGATGATGCCGAGGGTGAATGTT

>SnonOR10

ATGXGTGTTTGGCCACATCCGAATAACTACATCATTTAAGAAAAGTGTACATGCTTTTTATCATGTGGACTCAATACTCATTCTTCTATTTCGAG  
ATCATCTACATAGTGGACGTTTGGGGCGATATTGACGAGGTTTCTGAAGCCTCTACTTGTCTTCACTCAAGCGTCTTGTGCTATAAGACTACC  
ACCTTTATGGTGAATAAAAATAATTTGTTAGATTGTTGGGATATGAGATTGTGATGATTTTGGAGCCAAATTTGAGCCAAATTAACAGCAATAAAAAATTTT  
AGCAGCTCAAGCTCGAAAATCAAGCGTCTCTGTTGTTCTTTTTGACCAGCGCAGCACCACCTGCACGTTGTGGCCATGATTTCCGCTGTTT  
ATGACGCCAGCAAGCGATCTTTTCTTTCAGAAATCTGGATGCCAGTAACTCCACTAAAGTCTCCTGGCTATGAGCTGGGGTACCTTACCAGATG  
GTCAGCATCTACATCAGCGTCTTCTCTTTATATCTGTGGATAGCGTAGCCGTTGTCATGATCATGTTCCGGGTGTGCACAGCTGGAGATCATCATG  
GATAACATTAAGAAAGATACAGACTGTGATTGATTACAGCAGACAGAGGAACTGTAAGAAGTTAATCAAATAAACAGCAATAAATCTTGTG  
ATTGCATCAAACAGCATCAGTGTGTTGAGAGGTTTATGCAACTGTGTGAAAACAATTTGTCATGCGAACATAATCTTCCAACTGAGCGGCACGTT  
GCTATCATCTGTAATATTGGATTGAGGATATCTATCGTGGAAACATAACAGCGTGCAGTTCTTCTCGATGATAAACTACATGGTGACCATGTATC  
GCAACTGTTTCTGACTGTGGTGGCCACGAACTTACTATAAAGAGTGAATAATCTCCGTGAATGGCTGTACCAATGTCCGTGGTACGAACAAG

ACACCAAGTTCAATCGGGCTCTGTTCATAGCCATGGAACGTATGAAGAAACCAATCATATTTCAAAGCAGGCCACTACATCTCCCTGTCTCGACCT  
ACGTTTATTCGGATTTCTACGTTGCTCATATTTCTACTTTCGCGGCTCTGAACCGGGTGAACACTGAT

>SnonOR12

ATGTCCGAGTCAACAATAGAACAAGCGAAAAGGGAAATTAATGAATCCCTGGTCTGAGCACCTTCTGCATGCGGCGCATCGGCCTTTCATTAG  
TCCAGGATCCCAAAAGCCGATCTGCTTACTTACGTCAGAAGCTGATGCTTATAACTTCCGCTGCGGCATTTGCTATCAGTATTCAGTGAAATC  
GTCTTCATAGGTCTCAGTTGGCGAATTCGCCACGAGTTCGAGGATGTCGTTCCACTTTTCCATACTTTTGGCTACGGTGTCTTAAGTATTGCAAAA  
GTATTTGTATTGTGGTACAAACAAGACGTATTTCTGTCAGTTGCTGAATGAGTTGGCAGGCATATGGCCGATGCCTCTCTGGAAAAGGAAGCGCA  
ACTCATTAAGAACAGGAGTCTCGCCGCTCTCCGCATCACCCATCGATGGTATTCTTTCATGAACATATCCGGGGTCTGGTCTACAACCTTGACGC  
CAATCGTCATCTATCTGCTTGGCCTGATTCAAGGCAAGGACGATAAGATTGGTTACGTCCTGGTCTGCTGGTATCCGTTTGATAAACACCAAACG  
TTTATGCACGTCGCTGTTTATCTCTTTGAAATATTTCGCTGGTCAAACCTGCTCTGGATTATGGTCACTACAGACCTCTTATTCTCCGCAATGGCC  
AGTCATATAAGTATCATGTTACGACTACTAAAGCGCCGACTGGAGTTGGTGGGGACAGCGGACAAAGACATTATCAGGAGTACTGGGAGAC  
ATCAAGTTACATCAGCGTAAAGTAACTGCAACGATTTAGAAAACCGATTTTCTCTTGTGAACTTCGTGAATATTATGTTGAGTTCGGTCAA  
TATCTGCTGCTGGTGTTCGTAATTTGTGCTTCTAGAACCCTTTTGGAAATCAGTAACAAACTATTTTGGGCTCAGCTCTAATTCAAATCGGAAT  
GCTGTGTTGGTACGCCGACGACATTTTTCATGCGAACGCCGACGTGCTGTGCGGGCTACAAATAGTGTGGTACCGTACTAATCCCGGTGTC  
GCCGCGCCTGCTTTCTTATACAGAGAGCACAAAACCAATTGCCTTACAGCAATGGGTTTACTAATATAAGTCTTGTAACTGATTCAGCG  
ATTTCTACAAGACTTACTCGTACTTCCGCTTATTGTACACGATGTACAGCGAAAAAT

>SnonOR14

ATAATGTCATTCTGTGTTTCGACGACTTCTGTATGTTGGATTGTTACTATTTCTTATAGTTTTCAATGTTTGGGGACATTTGAAAATACTACTTC  
ACGATCTAGAAACTTTTCCATTGCTGTAATAACAAGACTTTAATATGGACTGTAGATCCGTTACTGTAATAACAGGAATGATTTCCGAAGAT  
GAATGAAATTAATTTAGAAAATGAAACCGTGCATAGATTACACCGATTTAAATAATTTCACTGATGAAATATTATGTTGAGTTCGGTCAA  
GTTGTTATTAAGTATTACATGTTTCAAGTGAAGCGGGTGTACTACTTCTGAAATGTTTCGCAATGACAGCAGAAGCCTTGGCAGGATACTT  
ACCTTATGATTCATAGTTTTTCAACAGTTAATTCTGTTGTCAGTTATATTTGAGTTGGTAGCAACTACGAGTGGAAAATTGAAGGATCCGTTTA  
CGGTGTGCCGTGGCAATATATGGACACAAAAGATAGGAAGATCGTTCCATATTTCTGTACAACGTTACAGGAACCATTAACGTTGAAGGCAATG  
GGGTGGTCCGATGAGGAGTCACTACTATGGCCACGATTTTGAACATCGCTGTCTTATTTCACTTTCCTTCGTAGCTTGT

>SnonOR15

ATGCTTTCAAGTTTACGCAATTTTTCTTTAACATTTGAACCTCAAGAAGGCGTACCTGTTACGCTGAATATCCCTACCTTATACTTCTACGCCAC  
CTATTATCAGTAATAGTTGTTGGCCCTTAAAATACTGACCCGCTTGACACTGTAGCAATACGGAGAAGAAAGTCTGGGTGTCCATCCAGAG  
GTTTTTTCACATGTTTATATGTTGATTTGTGTTTTTGGCGGGTACGATGTTGTTGTCACAAAAATCGATGACTTCTTTCGAACCTTGGACAT  
TTGATATATCTTTACTTATGAACGCGATTATTTTTCTAGAACTACTACTCTATGTTATAATGATGAGTACGTAGTCTGGCCGAGAATTTTTGG  
AAAAWTGCACTTTTTCTACTACAAAGATCGCTCTGAATTTCTATGAAGATTCACAAGCAAGTTCATCGGATCTCCCACTTGTTCACCTTATGC  
CTCGTTTGCCAAATGTAGCCGCGCTTCTTCTTTCAACGTTACTCCCATGTACAACAATTTACAGCCGGAACTACGCTAGAGGAGGATGCA  
GGGAAACGTCACATATGACCATGCTCTATATTTCTCCAATCCTTTTCAACGCTAACGATTTGAAATGGTATATTGCTTACAACCTTTTACAATTTG  
GGTATATCCTTTACTTATGAACTGTTCTGCACTGCAAGTGTGTTTTCTGCTCATGGTATTTCACATGTTGGGGTCAATTTCAAGATTTTGGCT  
TACAACCTCGACAACCTTTCGAAAACCCACAATAAGACAAGCTTCATATTAGAAGGCACTTTTACAACCTTAAATTAATGAAATGTTTACACCCAA  
TGAGCAAAAATGTTAGTGATCAACTACATGAATGATTGACTATACCCGAAGCATTGTTAATTTACAGACAAAATGTCGGAAGTATTGGGC  
CAATGCTGTTTGTCTACTACGGTTTCCATCAAACAAGTGGATGCTTACTACTCTGGAGTGTCTACAAAATGACGACGGCAGCTCTGACACGCTAC  
CTCCCCTAACAGTGTCTCTTTCAACAACCTTATACAGTGTGATTTATCTGCAACTTATGGCAGTATTAGTACCGGTTAAAGAACGCTGTA  
TATGGTGTACCGTGGGAGATGAGACAGGAAACAGGGCAACAGTGGCCCTTCTTCTTATGAATGTAAGAAACCAAGTCAATGTAAGGCAAT  
TAGGACTTGTGATGTTGGTGTACTTCTATGACTGCGATCTGAAAACCTCGATTTCTTACTTACCTTCTCAATAGCATA

>SnonOR16

ATGCTTTACGTAATTTCTTCTCGAAAACGAACTGTAGTTGGCATCACAAACCCATCCGATTACAAGTACATTAATAATACGTTTTCATGCTG  
GTCATCATCAGCTCCTGGCCGCGAAAAGAAATAGGAGAGCCAGAGTCAAACTACCAAGCCATATTCTTTAAGTACTTATACTTATGTATCACTAT  
GTCTTGCACATTTGGAAGCGTTTCTTATGTCATCATACACATAAGCGAGTTATCTTTTTTGGAAAGTTGGGCATATGTATATTATACTTATGAC  
TACAGTTAATATGTCCAGAGTATCACACTGTAC

>SnonOR17

ATGGATTTCGTGAGTAACRTCCGTGTCAAGTTATTCAATTTATCCTTTCAATTGATCGATCTAAAATTATAACAACTGTTACTACTTGTATTGTTGGT  
CTCCTTCTTTTACAACGATTCAAGTTAYTCGTTACACTTTTCTTAATTTGCTTCAAYAACTTCGACTGGTTCGAGATCATCAACGTCGCTCCCAATA  
TCGGAGTCTGTCTATGATCTGAATAAATATAGTAAAATCCATAACAATAGAGATTGTACGATGAAATATTCAAACATTTTCGATTTCGACCTA  
TGGGAAGCAGTATCTGATACAATAGAACAACAAGAAAGATTTGAATCAATACACGACAGCAGACAAGACTAATATTAAGATTGTTATTTTACA  
CCATTGGACTCACCATAATTTGTTGATTTATTGCTAGAATCATCATGGTTTACAAAACAGAATTTCTCGTGAAGAAAAGCAGTATTGTATCCTT  
ATAATGGCTGGTACCCCTTCGACAAGAACCTGTGGTATAACACTGTTTATATCTGGGAGAGTTTTATGACTACGATGGTCAATTTTCACTGACCTT  
TTGTCAATATGCTTCATATTTCTTTACTCGATGATTTGTTGAAATGAAAATTTCTCGGGAGTACCGTGGAAAGGGCTAGTTACTAATGAAGACG  
TCGTTAAAATTAAGGAAGGAGAAAACATGGAAAATCTCATATCCGTTATAGAAAATAAATGAAATTTATATTCCAAGCATCAGTTTTTGGCC  
AAAATCACAGCAAACTGGATATTGTTGGGAGATGAGATGTTCTTGCATATGCTTTAGGATCTGATTTTTAGGCCTTACAGCATTTACAGC  
AACAGTGGTTGATGATCTGTACAATCTGTGCGCTACTTTTCTTTTCTTTTCTTGTGTTGAGGATTTTTTGTAGTGCACAATGGGACAACCTG  
CTCATTGATCACAGTTACAAGTTGGAAAAGCCATCTATTTCTGCAAACTGGGCATACGCTGATTCTGATACAAAAAGATGATGCAGATTTTCTT  
GATGCGTTCTCAAAAACCTTTGAATATAGTGCCAAAAGGTTACTTACTGATGAATTTAGAACTTTCAAGTGGGATCTGTAGCTTATCTACCAGTT  
CTTCAATTTGCTYCGCACCGCATACTCGGAA

>SnonOR22

ATGCGTTTTCAAATTAAGGGATTTTCTTTTAAAGGAATCTTTGATTTCGACAGGCCAGATATTAATCTTTATAATTTTTCATCCACAGTTGCGG  
ATTTTTCTCGCCATGAAAGGGTTTTCTTTAGCAATAGGAATTCCTGCTCAGATTGATATGGCTGCAATTTGCATTTACTTTCCATCGTTGCG  
ATGACTCTGGAAGAAATATTTATCTACCGCGGGTCTTATAAAGGACTATTTCTTCCGCCACCGAATGCTTTTGTACTGGGTACTCCTCGGCTGC  
ATTTCAAACGCTACTGTAGTATTTCTGCCAAAACCGACGACTTCGGGATATTGTGGAGAAAATGAACGAGGATTTTCATCTTTGTTGTAGTCT  
GGGCCCTAGATATAGAAAACATTTTTAGAAAACCCAGTACTGATATGGCAGCTGTGCTTTTCTGCTGGATCTTTTTCGCTCTTTTCGTTGGT  
GTTCTGATGTTGCCAGTAATTTGCTGCTCTACCAGAGCTGTTCCGACCATCGACGAGAACACCAAGCGACCATTTGCAGTTCCTCATGTGGT  
TGCCCCAGATGATCCCTACAGAACCCGAACTATGAAATGTTCTTGGTATGCAAAATGCTTTTGTGATCATATTTGTTCAAGCTTTTTGTTGAT  
ACATCTACAGCTACTCCACATCTGCTGCATTACTATGCAATAATGAACATGATTAATAATCGACTTCAGCGTCATATTTCCAGGGTTTGGACGAA  
TCTGTGCGCTGCTTCTCGCATGATGAACGGAGAGTGAACAACTCAGCTTACTCAACCGGAGGATCGGAAAATATTGTGACGGCTCATCTTTC  
AGTGTTCAGCGCTGTAACACTGTGTCATCCGTATATGGGTTACCCTTGTGTACCAGTTTCTTTCAGTTCATCGCCATATGCCTCATAGCGTA  
CCAGATTGCCGAGAACTTGAYAACGGCACTTTGGACATCTGTTTGTCTGCTAGGCATTGCTGCGTGTGCAACTTGGATTCCATGCTATCT  
CGGCACCATGATAAGAAACAAGGCAATTTGAAGTAGGAGATGCAGGCTGGACTTGGCGCTGGCAGGAGACGCCATTAGGTCTGATGATTGGTCT  
GACATCAATCATCACTACGAGCTACAGCTTACACTCAAGTTTCACTTCAATGCTGCGACAATACAGCAAA

>SnonOR29

ATGAATTCGATTTTCAAAGCTTAGAGGACCCGAAGCGGCCATTCTAGTCCCACTACTGGATTATAAAGAACTCGGGATTCTTGTACCAAA  
AAGCACACTGCCTAAAATAATGTGGATGATAGCACACGAGGACGTAGCTATTTTCGTGTTACGCAATACATGGAGCTGTACGTAATTAGATCG  
GATTTGGATCTCGTATTAACATAACATGAAGATTTCCGATGCTGAGCGTGTGTTGTGTCGTGAAAGCGCACTCCTTATCTTCGGCAAAAACATTTGG  
CGGAAGTTTTGGACTACGTCACAGAAGCTGATATATTCGAAAGACTTAGTGAAGATAGAGTTAACTACTCGATTGTTGAAAAGTACACCAGAT  
ACTGCCGTCGCCTTTCATATTTCTATGGGGTGTGCTTTACAACGTTCTTGACAAACAGTCTGTACACCACTTATGAGATATCTTACGTCAGCTAC  
CTTTAGAGAAAATATCCGAAATGGGACTGANGCTTTCCGCAYATCTTCAGTGTGGACACCATTGATAGGTTTCATTCACCAGGTACTTGGGA  
TCACAGTAGTCTGGCATAACACTCACATGTGCTTATGGTGGTTAAACCATGGCTGCTTATGACACATGTATCGTGGTAGTTATGGTGTCTTTGGTG  
GAAAACCTGACTGTTGCGGGAAAGATGCAAGCAAATGTTTGGAAACCGAAGGAAGTGTGATCAGCGACAAGGAATGTAAGGAAGTGGTGCAC  
AGCTTACGACATACACGTCCTGTTAAAGTATTCGAGATTATTAACCTCCCTTTGTCACCTGTGATGTTCTTTACATAGTCATGTTGCTT  
GATGCTTTGTGCGAGCGCCTACCAATTAACCTCCGTCCTCAAAATGCTACACAAAAGCTATTGACGGCCGAGTATTCATATTTGGAATTGCACAAC  
TTTTCTTATCTGCTGGCATAAGTAAACGAGCTTTGATCAAAAATGAGAAAATGCATCAGGACCAATTGAAAAGTAACTGGCACATGGCAAGCTAC  
AAACAAAAAAGACGTGCTACTTTAGTCAGGACGCTCCGATTTGTAGCATGTTCACTGCAGGGCCCTTCG

>SnonOR33

ATGCATCAACCAATGAAATAACGAAACCTAACGAATTGACAAAACCTATTAGATCAAGTAAACACGATCGGTTTTCTGTTGGGGATAAAAGATA  
TCTGGATTACAGATCTCAAGCTTTCCAGGAGATTGTTTACATCTACAATAAATCTTATATGTTGTAATAATTAACCATGTGATTTTATGTATGT  
CGGTTGTAGGATCTTCTTACCCAAAATGATTTAACGGAATGCAAGGCTAATGATCAACTTATTTTCGGTTTAAATTTCCGGCACTGATTC  
TGTAACGATATCATTGCTTTATAAGGAGAGGAACATAAAATTTCTGTATCAACTAGCAGTTGCTCTAAAGGAACACCAGAACGATGCTAACTTG  
GAACGTGAGATGATTAAGAAGATAAAAAGTGCATCAATGAGCTTTAATGTGCTTGTGTTGTTGGGCTATTTGGTGTGGGGCTTGCCTGCTGTGTA  
TCGAATGATTAAGTGCAGGCGAGAAGCTTATCACTCTCATATTGACATGGCCGACGTTCCACGACGAGTCCACCGCAGCCGAGTGACGAGGGTC  
TCTTCTTCACTGTTGGATTCCCTTCGACGCCATGATCACTGGCCACCCTGTTGTTTATGATCATTAAAGCTATTGGCCATTGGCACTACA  
AAAACCTGTCGGTATATTTCTATAGTCTTAAATGACATAATTCGACGATGTAACGTTGAGCCAAGCGGAGAAGGAATGAAGTATGAACAGGCGTT  
TATTATTGGGATTCAGATGCCTCGCTCACGTTGTGGTGTAAAGAAGCAGCAGGAGCATGTCAGTAAGGGGTTATTTCTAATAGAGATATGCTGTA  
ACTGCATCTTGTGTTGATAGTAGTGTACTTTACAGGTTGCTGAACGTTACTTTATCCAGTTGAGTTCCGGCATTCTTATGGCGATATCAACT  
GTTTGTCTTGGGATCTTCAATGTGGAACGGTGGCGATATTACTGTAGGGCGTCCAAACTATCAGATGCGATGTACAGTTCCGGCTGGCAGAAT  
TGCTACGGACAGTCTCAATTCGATTAGGAAGCTGGTGTCAACGCCATGAGACAGGCTCAGGAGCCGGTGTACAAGATTTCCGGAGTCA  
TTGATTTCTGTCAGGATCATACGTCCTTATCAAAAATGCCGTACACCGCCGTGTCAGTATTCTAC

>SnonOR45

AGGTCCTCTTTCTTTGAGAAGGACTACAAGAAGTGGCAAGTCTATTACGCTACATGTCTACTGTGCAACGGAACCAGCTGGCCAAAAATGACAT  
GGAGCATGACAAATTAATTCATGATTATATCAATAGGAATCGGAAAGTGCATATTTGATTTGGTTCTCGCTTTTCTCCGTCCTCAGCATTTT  
CACTGAGCCTTACAGGAAAAATGAGATAAATGTGAATGGGACGAGCACCTTTTGAACCTTATTTGATGGCTACACTCCATTTCCGGACGAACCCC  
CTGGTTACTACATCTCATAGGCGTCCAGAGCTTCTGGGTTATATTTCTCAGATCTACATCGTCGCTGGGATACCTTATGTTGGCTTCTGTAATGAT  
ATTTCTTCCGGGGCAGTTGAAGATCACCCGTATATATTGTAATAATGATGATCGTCGCTGCGGATATGAATCAAAGTCATCGTAACATTGCAGAGT  
GTCATGCTTCCATACAACATTTGGTCGAGAATACGGCTCTATTYAATGAACTRATATCACCGGTGATGTTCCGCTACTAGTATTGTTGTCAGTTA  
ACCTGGGGGTTAATATCATAGAGATAGTTTCAAGATCTTCAAGTGTGGCATCCAGTGTATGTTTGTGTTCAACTGTTTGTATCGAACTCC  
TAGTCTTCTACTGGTACGCCAATGAAGTCACTGTTGAGAGCACTTTAGTGAGCTACAGTACATTGAAAGTGTATTGGACAGAAGCTGACCAAAA  
GATACGAAAGGAAGTGGCGCTGCTAGGGCTCACGACTGGGAAGATAATCATCTTCAAAGCTGGACCCCTCAATGACATGTCCTTGGCTACTTTTG  
TTGGCGTATTAAGAGCGAGCTACAGCTTTTACACACTTTTGGAGCAGCAAAAC

>SnonIR1

TGGCTGTTGAACGGCCACCACCTTCTATCAACTCCTTGAAGGAAGTCTGTTGAGAGTCCATTGGAAGTGAATTTATGAGGATATTGGGTATACGG  
ATCATGTTGCGAAGCCATGTACTATTATAACAAAAGGAACGCTCAGATCGAAGACGAATTCGGGAAGAAAGAAAGTCTTTAGCAAGAAAA  
GGACGCCCCACTATTGGTTGATCTGGTGAAGGAATCCAGATGGTGCAGAGAGGAGGTTACGCTTACCACCCGAAGTCAACAGTGCACACGGC  
CTGATATACAAAACGTTTACCAGGATGAGTTATGCGAGCTGGTCTTACAGTCTGATGGAGAAGACCCTGCTGTATCCTGTCTCAGAAAACA  
CAGCCCTTTAAGGAGTTTATGACTTGGAGTCTCATGCGCTCTCAGAACAAGGCATAGTTTCTTGCATCCAAATCCGACGGCCCTCATTGCAAG  
TCAAGTGTGAAGGAGTCTCCACGAGCTCTGGCTTTGGGAGGGGACGACCTGCTTTCATCTCTGGCTGGAGGGTATATACTGGCTATAGTT  
ATTATGTTGGTAGAAAGATTG

>SnonIR2

ATGAAAGTGGCCCTGGATGTGAGCGCAAAAAGTTTAATTTACAGGACTTCCATTAAGAAAGTCTCTGTAAGAGGAGAAGTCTGGAAAATAAGTA  
AATATGTATGCGAGCTGGCGGAGGAAGGCATAATCGGCATCATAGATGGGACAGGCGGGCGGCCAGTGAAGATATCCAGGCATTTGTGATA  
TGCTGGAAGTCCGCATATCAGCATAACGACCTTCTAATGACGAATGGTCCGCTTTGAACATGTACCCAGCCCTTCTGCTTATAAT  
ATGGTTTTAGAAGAGTTGATATTACAAGGAATGGCAAACTTACGTTATTGTACGTAAGGGATACAGTCTGCTGCGCGTGAAGTGAAGTTGAT  
GCAACTTGGTAAACGACACCGTACCTTGTACCTTGAGAGAACCTCAGTGGCGATGATTACAGGGAAGTCCATTAAGAGTAAACACAAC  
GGTTACACCAATTTCTGGTGGATTGTCCTAAGTACTTGAACAGATGTTGCTTACGCACAACAGGTGGGCATGATGGCCGAAGAGCATTC  
GTACATCTTCTGTCCTCCGATCTTCCACCTGGACATGAGTCCGTTACCAATACGGCGGTGTTAATATGACCCGATTTGATAGTAGAACTGG  
AGAACAAGACAATGAGAAATTTGGAACCTTACGATGACGTTCAACCAAGAAACCCGGAAGAACCTAGAGCCGGAGCAACTTAAAACAAAAC  
TACTCCTCATACAGCAGCGTGAAGTGTGACCGCAGCCATAAGAAAGTAAACCTGGAAGCTGAACCTGGAAGCTGAACCTGGAAGTAAAGATA  
TTGGGATTACGGGTCAACACTCTAAATTTTATGAAGACGAACAAGGTGTATGGAATTAAGATCATTGATATTCAATGGACTGGGAGAGCGT  
ACGGATGTCATTTGATATATTAGAATTAACCTTCTGCTGGCAATCAAACAATAGGTTTCATGGAAAAACAACAATTAATAAAGAAAGCCGT  
TTGTCGCTGATGCAGAAAATA

>SnonIR21a

AAAACACTTGGAGTAAGACAAGTAAGGTAACAACCGGTTGTTGATTGGTTGGTATTGGATTTTCACAATTAATAACTAGTTGCTATACTGG  
ATCTATTATAGCATTTCGTAACATTACCAGTATTTCCGAAACTGTGGACACAATAAAACAGTACTTTCGGGATTTATAGAGTTGGAACCTTAG  
ATCGAGGTGGTTGGGAAAAATGGTTCTTAAATTCATCTGATCCCGATACCGAAGAAATATTGAAAAAAGTGAACCTGGTACCAAAATGTCGACG  
CGGAATAAGAAAACAACCAAGGCTTTCTTTGGCCTTATGATCTTCTGGATGCAAAAGCTGAACCTGAAATATATTGTGCAAGCAAAATTTACTG  
TGACGAAATCAAAGCGGGCAGCTCCTCCACATTTCCGACAAATGCTTCTTCCATTCGGAATAACCAATGGGGTTTCCCAAAAATTCGGTTTATTTCC  
GCAAAAATGAACAATGATATAGCTAGAATGATTAACAGCGGACTTATTGACAAGATCACCGACGAAGTGCCTTTGAAATACAACGAAGTACA  
ACCGGAAAGTTACTCGCCCCGACAGGCTGGCAGYGGCGCAATAAAAATACTATCAGCTGAAGAAAAAGGACTCACTTTAGAAGATACACAAGGA  
ATGTTCTGCTTACGAGCTGGTTTTCATCATAGCTGGAAGTCCCTAGTTTTCAGAATGGATGGGAGGCTTCAAGAAGATGCAGATTTACAAG  
AAAAGTTGATACCCCATCAGTGTGTAATTTAGAGAACAACCTAATTTCTACACAAAAACTGATATTGATAGTGAATAAAGATTATAGAAGAC  
ACTGAGAGTAACTGAACCTTTGATAGTAGACCGTCTACTGCTGTGCTACAGATACTTTAGATGGTGAAGTAATACATGTTACCAAGATAATAT  
TGATGTACATAACTCTTCAACGTTGATAGATTTGATTTAGACGTTGAGCTTGTAGACCTGGATAGAGAAGTTCGGGACATATTCGAAAAAG  
ATTCGAAGAGATGTAGATTTGTTTCTCATGATATGGAGTCTTTAGATGAAAACGGAAGAACAGTTTCTAATGCTGCCTTTGGTATCTATAAGA  
CACGAT

>SnonIR25a

ATGAACGGCGAGCCAGAAATACATCCGCCTTCTACTTCGACCTGCTCTGAGAACGTTTTAACTATCAAATCACTACTGGACTTGGCAAGTG  
GCCAAACGACATGAAATATATTACATGTGACGACTACGACGGCAAGAAATACACCAAAATAGGACCTTGGATCTTAAACCGGCTTTCCAAGAGATA

AAGGAGACGCCTACATATGCTCCGTTTTTATTCCACAAGATGACCCCTGAACGGCAGAAGCTACATGGAATTTAGTACCGATCTGCTCGCTAT  
CACGGTCAAAGATGGAGCTTCTATAAGTAGCCACTCGTGGGTTCTTGAAAGCTGGCCTCTCCTCCAACCTAACCTTGACTGACCCTAATAATA  
TGAGCAATTACTCCGCGCAGCTAGTCTACAGAACTCGTCACAGTTCGAGCAAAGCGTTTTATAATACCGGACGCAAGCAACTAAAGCTACAA  
AGGCTATTGTATCGACCTTATTGAGGAGATTCGGCAAATCGTTAAATTCGATTACGAAATACTTTGGCTCCGGACGGTAACTTCGGCATAATGG  
ATGAGAATGGAACTGGAATGGAATATAAAAGAGCTCGTAGATAAGAAAGCGGACATAGGTTCTGCTTCCGCTGTCGGCTATGGCTGAAAGAG  
AAAATGTCGTTGACTTCACTGTACCGTACTACGACTTGGTCGGGATTAACAATAATGATGAAACTGCCGAGAAGTCCGACATCCCTGTTCAAATTC  
CTAAGTGTCTGGAGAATGACGTTTGGCTATCTATACTAGCTGCATATTTCTTTACCAGTTTTTAATGTGGGTGTTGACAAAATGGAGTCCATAC  
AGCTATCAAAAATAATAGAGAGAAGTATAAAGAAGATGAGGAGAAGAGGGAGTTACTTTGAAGGAGTGTCTATGGTTTTGTATGACGTCACTGA  
CTCCTCAAGGAGGTGGTGAAGCGACAAAACCTTGTCTGGACGACTGTTGGCAGCTACGTGGTGGCTTTTTGGTTTTCATCATAATCGCATCGTAC  
ACCGGAACTGGCTGCGTTTTCTGACAGTTTCACGCTGGACACTCCCATTGAGTCTCTGGATGACTTGTCTAAACAATAACAAAATACAGTATGC  
TCCTCTCAATGGGTCTGCGGCATGACTTACTTCCAGAGGATGGCTAATATAGAGGAGAAGTCTATGAGATATGAAAAGAAATGAGCTTAAAC  
GACAGTCTAAAGGAGGTGGAGCGCGCAAAAACAGTACGAGTATGGGACTACCCGTCAGCGACAAAATATTTCCAAAATGTGGCAAGCTATGGAAAG  
GCAGTTCTCCCAACACTATCGAAGAAGCGCTACAGAGAGTGAAGGATCCAAAGAGCTCTAGTGAAGTTTCCGCTGGCTGGGTGATGCTACTG  
ATGTGAAGTACCATGTATGACTAGCTGCGACCTGCAGTCAAGTGGAGACGAGTTCTCGAGGAAGCCCTATGCGATTGCCGTCAGCAGGGTTC  
TCCTTTGAAAGACCAGTTAATAATGCAATCCTGCAACTCCTAAACCAACCGAAGCTAGAGAAGCTCAAAGAAATCTGGTGGAAATAACAACCCA  
GATTCATGAAATGATGCTCGAAGAACAGGACGCAACTGTGACGGGATCCATCCAGACATTTGGAGGGGTGTTCACTGATCCGTCAGGACATCG  
GACTGGCTGCGTCCCTGGGTGGGAGTACTGGTGGTACAAGTGGAGGAAGAGGCCGGTGTGGGAGATGTTGGTCAATTAATCTCAGGTGGA  
ACCAGCAAAATCATCTCGAAACAACGTTGACAAGCAAGACGAAGTTTTAACTTTAGAGGAAGGAAATTGGGTCTTAACTTTAAGCCCAAGTTT  
TAA

>SnonIR41a

TTTTGTCCATTGATGAGGAATAACGAACATTATAATATAAAACCTGTTCTCATTGGTGTTCGATGAAAGGAAGCACTTTTGTCCAAACATG  
TTGATGATTGCAATGTTGCAAGTAAATTCAGACTGCAAAACATTCGAGATGATTACACATAAGTTTGTGGTCCAGATGAAGAAACTCATCT  
GCCTAAAACACTGGATCGTTGGGATTATGTTCAACAAGAGTTTAAAAACCAAGCAAACTATTTCTCCACGATATGACAAAATTTATACGGGAAA  
ACGGTAAAGGTGGCTTTACTTCAAAACCTTACGTGTTGTGGATTTAGACTRGTCTATTACACCTTCAGGCAGAGATGGTGTGGAGATAAG  
AATAGTGGAGTAACTTGTAGGTGGATAAATGCACTGTGAAATCGTTAGCGAAGATGTTGACCACTGGGGGAGAAATCTATCCAAATGAAACC  
GGTGGCATTGGGGTAATYGAAGGTCTTGAAGACCGGGCAGAYATGGGAATATCTGCCCTTTATTCTTGGTATGAAGAGTGGCGTGTGTGG  
ATTTTTCGGCAGCTGGTGTGAAGACGGCTATTACTTGCATAGCTCCAGCACCTAGTTATTATCGAGTTTGGAGATGTCCTTTGATGCCCTTCAGTT  
GGTATATGTGGCTTGGCTGAGCTTCACTTATTTCTATGCATCAATGGAATGATAACTGTACTAGGATATGCCACCCTTCAATCCGTTTCTTC  
ACTCCTTTGAAATGATGCTCGAAGAACGCTCCCAATACGAAAATCTCAAGTCTTTCATGGAATAAGAAATGAGAAATGAAAGTGTGGTGGTATGCA  
GGGCTAATTCTGAGCAGTGTATTAGGAGCTGGTCTTGGCTCCACATTCAGTACCAGAAATTCGAGCCTTCTATAGATAACAGTGAAGATATTGT  
GGATAGAGGACTGGAATGGGGCGCCACACATGATGCATGGATATTTCTCTAACTTGTCTAGTGAACCTCTGGTAAACAGCTTGTGAGCCAAT  
TTCGTATTTATTTCTTCGTAATAATGAAAGAAAAGTTTTACACGAACTATGGCATAACAGTATGAAAAGTTACCTGCAGGTAACCTTCGCTATA  
GGCAGTACGTAAAGCAAGCGCTTGGATAGTATGCTAAGTACTGCTGAAGTCTACTACGAACAAGTGTAGTGTAGAGAAAGTGTGGAGACT  
CTCCGTACACAGAGAAAGTACGCAACTCGTAGGACGTCTACACCAGTCCGGACTGTTGTTAGCTTGGGAAAACCTCAGGTAGCGCTAAAGCACTT  
GAATTACAAGAGTGCAGGTAGAAGTGAAGACTGTCAAGAACCAGAAAATGATGCCGCTAACTTGAAGCCTTTGAATCTCGACAATGTTGTGGCGGT  
TTCATCGTGTACGCAATTGGCCTAATAGCCTCCACGGCGGTTTTTGTGGTAGAATTGTATGTGTATCATCTAGAACGAAGAAGCAGCTAGCACA  
CTTTGAA

>SnonIR75p

GAGCAGAAAATGCTCTTGGTCCGACGAAAACGCAACCTCTTTCGTTACACCTACCGCTGGTTGGTTCATACCCTGGTCTAAGCAARCAAA  
CATGACTGCTTTRTGGAAACAGCCAGTAYTGGSCGAYAGCGACTTAGTACTGGCYGCGGGGACTGGCAGTTTYCTTGAAGCTAATRGAACCTTAC  
AAGCCTTACCACAAAGGCTCCATGAAATCTACCGAAGCGGGTACTACAACGGYACCCTGGTAGACCTACGTCCTTACCAGGAGCTATTTCCGAA  
GACGCGGTGACGTCATGGGACAAGCSATTACCATGTCCAAACKTATTTCGGGATAGCAACACCACGGTGGAAACATCTGCTGAAGGAGGATAGAAT  
GGAACCACAACACGACCCCAATAACTAAGATCTGCTGGATGAATGTGAGGCAAGCTCTCCAGATGTTGAACGCTACGCTCGCGCCGCTTTCAGT  
TACAGCTGGGGTAACAAGTTGAGGGCAAGTGGACGGCATGATCCGTGACTGCAATTCGGAAGAGCGGATTTGGGCACAAAACCTGCGTGATAT  
CAGACAATGAGCGCCTTGACGTTGGTTCTATACAGACAGCTGGCCCTTCAAGTTTCGCTTCAATTTCCGCCAGCCCCGCTGCCGTACGTTG  
GCTAATAATTTCTCCATGCCCTTCTCCAAAACGTTGGATAGCCATGTTTGTGTGTGCTGATTCTGATTTCTACTGTAGACGCTGATTGGGTTGAAG  
TGGGAAGCTAAAGGACGCAAGGTTCAACAACAATAGACGGCGTAGGCGATGCGATGTTTTTGTAGCTTACGTTGCTATTGGCCAGCAGGGATGTG  
CCATGGAACCTAAGTTACTTCTCAGGTCGCTGATGGTGTTCGTTTTGCTCACGGCGCTGATGGCGTTGTACGGCGGACTTCGGCAACATCCTC  
GTGCTGATGCAAGGCGCCGCTCCGACTCCATCCGACGCTGCCACAGCTCGCCGGGGTAAAGTACGCTCGCAGCTAACGACGCTCGATTATAACC  
ATTACGTTTTTGAATTTCAAAAGACCCAATACGTGAGGTGGTGTACAAGAGAAATCGAACCGGAAAAGGGGAATAAACATTTCTACGACCTCAA  
CGAAGGAGTAGAGAGAATAAGACAGGGTCTATTCGCGTTCCACTCGATGGTGTGCAAGTACGTACCTGCGCATTTAGCAGACGTTTTCTGGAGACG  
GAGAAGTGCAGCTGATGGAGGTGACTTCTTGAACAGCTTCGATGCATTCGTGCTGTCGAAAGGGGTACCATAATCTGGAAGTCTAAGAG  
TTGCTTTCAAACAATTTCCGAGTCCGGTATCCAGGACGCTTTTCAGGTGCTTCCAAGTTCCGAAGCCGCTCTGCACCAAGATGTTCAACATTC  
AGCAGTGTGGGCTGATAGACATGAAGCCGGTCTGATCTCTATGGTGTATGGCGTCTGCTTGTCTGTTGCTATCCGCTTTCGGGAGATCGTTGT  
ATTTAAATTGAACGACGGAAGGACTCTACAAAAGATAAAGAAAT

>SnonIR75q

ATGAAGAGAGTATTTTTCTTGTATACTGTTTTGTCTAAGCTATGGAGAAGATAATCAAGCAGCCATGATAATCGATGTTATTTCAGTACAGTGGT  
AGACCATCTTCACTGATAGGCAAACTTTGGTGGACTCTACTAGAATAATCCAACCTGCACTCGCGTCTTACGAATGAATACATTCTGTTACGGC  
CGGAGAGGTTGTCAATTTGAAAACGTGAGTTTTATGACAAAGAGCAACATGTAGTGTTCCTTGTCTGATCTAGATTGCGCTGACATTGACACAT  
ACTTCCAAAAGAAGCGATTAAGAAAATTTCTTCCGAGCACCTTTCGATGGATACTATTTGGAGACTCTAGCAATATTAATGAGGACATTGTACCG  
GAGGCTGTGCTAATAAAGACCTGCTACTTACTCAGAAGTGTAGTAGCAGCAAGCGTCGACGATATATGAAATTGCATCTATTACAAAAT  
AAGTCTTAAACAACACTTGAATACAGAATACTACGGGATATGGGATACAAAACAGATCCAGAAAATACCAAGATTTTTTGGCCGACATCT  
TTGAGGCGTCTCGATATTGATGGATACGAAAATAAGTATCTGTTATGTACTTCAAAAATAACAATAGCGTCAACACTTATCTGATGGTCTATACGA  
TCAATTTGATACAATTAAGAAAGTAAGTTTTCCCAAGCAACCAATTAAGTTTCCAAAGTCTTAATGCTAAAAGGAAAATATTTTTGCTAACACAT  
GGGGTTACCATGTCAATGGTACTTGGAAATGGAATGACTGGCTACCTAGTCAAGGGTGAAGTTGAAGTTGGAGGTTCCCAATGTTCTTACGTTTT  
GAGCGTGTATCTTCTGAGTACATATCAAGTCCAACGCCACCCGCTCCAAATTCGATTTCAACAACCAAAACTGTCGTATGAGAACAATTT  
GTTTTTATTACATTAATAACAACAGTCTGGTACAGCACCATAGCATTGTTGTTATAATATATCTGGTATTGGTTATGGTAACGAAATGGGAGTG  
GAAGAAAACAAGTATATGGCTGAAAGGAGGAAAAGACTAGCAAGTCTCAAGGGCCAATTTGGTTGATGTTATCGTTTTAATATTGGAGCT  
GCGTGTCAACAAGGAAGTCTTCTGAGCTGAAAGGGTCTTGGGTGAGTGGTAAATGTTGGTCTGTTCTTAGCATTGATGTTCTCTACACCTC  
CTACTACGCCAATCGTGGCTTCTTCCAAATCCAGTTCATCACACATCAAGACACTGGAAGACTTACTGCATTCAGGATCAAGTTGGGGTTC  
ATGACAGCTGTTTTTAATCGATACTATTTCTGACTGCAACTGAACGATGCGTAAAGCAATATAATGAGAAGAAAGCTCCACCAGGCACTACT  
CTCGTTTTATGTCTATGGTGAAGGAGTTTTAGAAATCGCGAAGGAAATTTTTCATTTACATGGAAACTGGGGTTCGGGTACAAAATTTGTGG  
GAAGTATTTCAATGAGGGAGAAAAGTGTGGGCTCAGGGAGATAACAATATCTGCAAGTAAATAGATCCATGGTTAGCTGTTAGAAAAGAACACTCCA  
TTCGGGAGATGTTTTAAATTTGAACTAAACGATTTCAAGAACATGGTCTGCAATATCGGGAAAATCTTCTGTTGACGAGAAAAGGCCAAAAT

GCTCTGGTGGAGGAACTTCGTATCAGTCAGCATGGTGGACTGTTAYCCTGCTATACTAATAGTACATATGGGACCATTGTCGCCTTGTT  
TTCCTTGTAGAAATACTAGTGTATAAAAGAGAAAAAATATTGCACAAAATAAGCTGCTTA

>SnonIR76b

ATGGCCGGAATAGAACTAATCATATCGTCGATATGTAACGCGACTTTCGCGAAGTCCCTTACAATGACACATATAAAGGGCCCGATACTTTGGA  
AACAAAGGAGATCAAAATATAGGAATTTGATGAAGGAGGTCAATGGAAAAATCTCAAAGTAACCACTTATAATAACACCCCTATGTTGGACG  
GAATGGCATAATGACACGGTGGTCGGCAAAGGCGTGGCTTTTATTATCATGGATATACTTCGAAAGAAGTTAAATTCACCTATGACGTGGTTGA  
GCCAAAAGAACTATGAGTTGGGGGTAAGACGGCCGAAGACTCCAATAATAGGACTGCTTAATGCCAGCAAAGTGGACATGGCCCGCTGCCTTT  
CTACCAACCTTGATAGATTACCGGGAGAAGGTATCGTTCTCTATATACCTGGATGAAGGTGTGTGGGTGATGATGTTGAAGAGACCCAAGGAAT  
CAGCTGCTGGGTCCGGTCTACTCGCACCTTTAATGATGTTGTGTGGTACTGGTCTGGCTGCGGTACTAACATTTGGACCCTGCATCACATCT  
TCACGCGAGTACGGAGCAAGCTGATCACGGACGACGAAGGTGTTTTGCCATTAACCTTCCTTTTGGTTCGTCTACAGCGCTTTCCTTAAGCAA  
GGACCAATTTAGCCCGGAAGCAACACACACCCGCGTACTTCTGTGACTGGTGGCTGTTCATGATCTTACTATCAGCATTCTATACCGCAA  
CCTTACTGCCTTCTTACAGCTGCTCAAGTTCACCTGGCCATCGAGTATCTAAAGAGCTTGTATCTTAATAACTACCGTGGGTGCGCATGCTGG  
CAGCTCGTGGAGCAGTTGTTAAATCTGAAGTGAAGAGCTATATTCTGAGTCAATGATTAGAAACAATAGGGCACGGTCTCTATCAGTA  
AGTAGCGATAAAGATTTCTGGAATCCGTCAGAAAGGCGCAGTTTTGGTCAAGGAACAGACCGTGGTGGAC

>SnonIR8a

TATTTTATTAATGAAGTTTGTGGAAGATACGTTGTACAGGGTATGGAAGGAAATACGCTCAACCGCACCTCAGACCAGGCTCAGTACAGGG  
TGTGGGATTATCCAATCAGGGAACAGTACGGACATATCTTGTGGCTATCAATGCTTCAGAACCCGTTCCAGATGCTAATACAGGGTCCGACAG  
GTGAATGAGCACAGACGCTGACTTCCGTTTCATACAGATTGACTGAAATAGATACGAGGTAACAGGAACTGCAATCTAACAGAAAGTTG  
GAGAGGTGTTTCGTGAGCAGCCGTACGCCATAGCTGTGCAACAGGGSTCCAGACTACAGGAAGACCTGTCCAGAGCCCTGTTAGAGTGCAGAA  
AGAACGGTCTTTCGAACTGCTGCAAACTGGAATCTGGAACCTGAGTATCTGAGACAGGCTGTCCAGATGCTGATGACGTCGGAAGGCATTACGCTG  
GAGAGTTTAGGAGGGTTTTATAGCAACACTGTTCCGTTTAGACTAGCAATGATAACGCTAGCATGGGAAGTTTTCTACTACAACGCAAGG  
AGAAGAATAAG

>SnonIR93a

ACAGAATTCGCTAATGACACGATTGCTGATACAATGCATGGCATGGACGCTAAGCTAACGATGACAGCTATTTCTAAAGGGCAAGCAGCTTTGG  
CGCTGCTTACTTACTGTTATACAGATCCTATGCCAGGTATAAACTATACTATGCCAGTGAGTATACAGTCGTATGCATTCATGATAGCGCGC  
CCGAGGGAGCTAAGTAGAGCTTTGTTGTTTCTACTTCCGTTCAACTGACACGTTGTTGCTCGGATTAGCTGTGATTCTGATGGGGCCAAC  
ATTGTACACCATTATAGACTAAGTCTTATATGAGGCCATGGAGTACTCTGCAAGGAGGTCTGGCTACCATACAACTGTCTATGTTATA  
TCTACGGTGTGTTGTGCAWYMAGGGGGAATGTACCTTCCCGCGCGACAGCGGACGCTCTGAGTAGGAACTTGGTGGTTGGTTGCTCTGGT  
TGTAGTAACCCAGTACTCCGGCAACCTGGTGGCTTCTCTGACTTCCCGAAGCAAGAGGTTCTGTGACAACCGTGGCGAACTCGTAGAGAACC  
GGGCTCTATACACTGGTCGATCACTAAGGGATCCTATATGGAGATGGAGTTGAAGAATTCAGACGAGCCTAAGTACATAGCATTGCTGAAAGG  
TGGGAACTGATCTCGGCTACTGTTGGCATGGGAGAACTATGGTGTGAGGGTTCAGCCCTTCTGCAGCGCTGCGTCTCAATCGACACGTCATCA  
TAGACTGGAAGATCCGCTCAGTACCTCATGAGGGCGGACCGGCTTAAAGCCGCAACTGTGACTTTGCCTTGAGCGCTGAAGATTTTTTAAAT  
GAGAAAGTCGCAATGATGTTGCTGCTGGCAGCCGTATCTTCCAGTAATAAACAAAGAACTAGACCGCATGCACAAAGCAGGCTGATCAGC  
GCTGGTTGAGCGCATACCTGCCGAAGAAGGACCGCTGCTGGAAGGCTATTCCATGGCGCAGGAGGTCAACAACACACGGTGAACCTCAGCG  
ACATGCAGGGCTCATTCTGCTTCTGTTTCTGGGTTTTCTCACAGCATCCACAGTGTGGTCTCGAGTTCTTATACAACAGGGCAAGCGCCGGA  
CGCACCAGATCGTCATCAAGCCTTATGTCGAA

>SnonGluR1

AAGGCGAAACTACTACGGGCAACGATCGATATGAAGGATATTCGAAAGATTTAATACATGAAATATTAAGAAAGAAATGCTTCACCTGAACATG  
AAATCGAAATAGTGCCAGGTAATGGTTACGGTTCGTACAGCAAAGAAACGAAAAAATGGGATGGTCTAGTGGGACATCTTTAGAAAGGAAAG  
CTGATTAGCCATTTGCGATTTGACTATAACTTATGAACGGCGATCGACTGTGGATTTACAGACACCTTTCATGACTTTGGGCATAAGTATACTTT  
ATTTAAACAACTCCCCCGAACCAGACCTGTTTTCAATTTCTAAACATTTTCGGTTGATGATGGATCTATATGGCTGCAGCTTATTTAATGG  
TGTCTTACTGCTTACTGTTTTCGTTAGCTAGACTGGCGCAAATGATTGGGAGAATCCGCATCCTTGTGACAAATCACCTGAAGAGTTGGAAAATATT  
TGGCATATTAAGAATTCCTGCTGGCTAACAATGGGTTCAATATGACGCGAGGTTCTGATATTTTACCAGAAAGGTTATCCACGCGATGGGTGTG  
CGGTATGTTGGTGGTTTTTCGCTCTGATCATGTGTTCTTACACTGCCAACCTGGCTGCTTCCCTACCAATGTGCAATGGATGACTCGATCAA  
AAGTGTGAAGATCTAGCTATGCAAACTAAAACTAAATATGGAACCCCTGAAAGCCGGTCCACGTAATCTTTCAAGCGATCTAATGTCTCCA  
TGTACCAAAGAAATTTTCGGTGGCATTGGAATCAGCTCGGCCATCGGTTTTCGTAAGCAATAATGATGAAGGTTGGACAGAGTCTGAAAGGCAA  
AAGAGATTATGCTTACTTATGGAATCCACAGCCATTGAGTACCAACTAGAAAGACACTGCGAACTTATGCAAGTTGGTGGCTTATTAGACTCTA  
AAGGCTATGGAATAGCTATGCCCTTTGATTCGTTTATCGAACTGCAGTGGACAATGCTTTACTGAAATAGCTGAAAGTGGCAAACCTTGTGGAA  
ATCAAAAACCGTTGGTGGAAAGCACAAAAGAAAGGCTTGTGTTGCGAGAAGAGCAAGCGAAGAGGCGCCGCTGGTGAATTAGGAGTAGCG  
AATGATGGCGGTGTGTTCTGAGTCTTAGGTTAGGATGGCGCATGGCTGCCGAATGGGATATTTGAATTCCTTTGGAACGCTCAGAGAAGTCGC  
CTGGAGCAGAAGATGACTCAATCAGAAGCGCTGTGGCTGAGCTGTCTATTTGCCCTAAGTTTCTGGGAGACAGAGAAGCCAGTGAACACTCT  
CGTCTTCTCCAGTGTCTGAGCTCCACGGTGTCTGAGAGCCTCATCCGTGATTCCGTTCCGACGCGGATTTGTTCCATCTGGACGATTTACT  
AAG

>SnonGluR2

ATGATTACCTTATAGCTTTCCTTACTGTTACCTTTATTGTTATCGTGCCGAGTGTCTATGCACTCCGCACTGCCGCTTCCCATAGGGGGCCTTT  
TCAACCGGAAACGCTGTCAACTTCAAGGCAGGATTTCCACCACATGATTGAAGCAAACCGAATGATGACGTACCACGGTTCGCTCTTTGGACTC  
GAAGGTAGTCGACAGTATTCCACTTATTAGAACTGTGTCATTACTTCAGAAGACAAGGGGATCGTGGCTTAAATAGACGCTCGGCCGACCC  
ACGGCATCTGCGACACTACTTGTGTTGTTATGTAATAGATTAATAATAGCCACCTGTCTTGGGATGGGAGCCTCAGCAACACAAGATGAGGAC  
TCTACACGTTTTTACATATCCACCACAGAACTGATCTCGAAGGCTTTTGCACAGCTCATTAAAGACTTGTCTGGGACAGTACCATCCCTT  
TATGAAGATGATGGCAGTTTTATTCGGCTACAAGAAATAATAAACTCGTGGTCTAGCGCCGAGGGAGTGGAAACCAATTTCTTCAAAAAGTTAG  
ACCCCTACAGTACAACCGGAAACATTCAAGTATATATTTAAAGTTGCACGAATAAACTACCAGTTCGGATTGTAACGTAACGAAGTTCAT  
AAATATATGAGTGAATCGTACAAGTTGAAACTCGACGGAGTACCAAGTTTTATTTAACGAATTTAGATGCATACAGCCTTGATTTTAGAGG  
GATTTCTGATCTAATGGCTAACGTTTCTACTTGCACCTGACGACACAAAGTGGCGAGTTGGAAGGACAAAGGAATGCTCTACACAAAAGCG  
TTGGGGCTCGAACTGCTTAAACAGCAGATGCTAAAGTCACTTAGAATAAGSATAAGAAAGCATGAGATGACAGTCCACTGAAACAC  
CCGCTCTGTGCTTAAAAATGGTAAATCAGAGTACGAAGATAGCGCATGGCTGCAGGATATGATCTGCGAGAAGCTCTTAGTAAGACCACGAC  
CAAAGGCTTCTCAGGGCACATTGAGTTGATGAGACGGGAAAAGAGTAACTTTAAATGCAATTTTCAAAAATAAACAAAGAGAGTCAATTT  
ACGTATGCAGGGGATGGGATTTCAAAACAATGTTATATCTAAGAAGGATGTTGACGATAGGTCAAGCTGTGAATTCAAAGTCTAAAATTA  
AGGTGGTGACAGTAGGAAGACCATATTTGATATATTGAAAACCTCCAATGGAACAGTATATCGAGGTTACTGCGTGGATCTCAATTGGAAGC  
CATATTTAAAATCATAAAAAGGAACATAATTTAGATTAGTGTTTACATAGCTCCAGAGAATAATTATGGTAGCCAGTTGGAAGGCACTAAA  
AAGTGGAAATGGAATTTAGGAGAACTGTTGGATCATAAAGCAGGYTAGGTATCTGTGATTTGACAAATACCTCGGAAAGGAATGCCGCTGGT  
ATTTTTCGATCCCTTTCATGTCCTGGTATCAGTTTGTGTTGTCAGAGAAGAGCCGAAAGCTCCGGACAGATTTCTCATTTAATGAGCCATTGT  
CTTTAGTGTGGTGTATTTGGTACTACGTTATGTTGATGTTGTTCTTCTTCTTCTTCTTCTTCTTCTTCTTCTTCTTCTTCTTCTTCTTCTTCT  
CTCACCCGTCGAATCAAAATCTGAGAATTTGGAAAATATATGGAGTCTTTATAATTGCATGTGGCTTACTATGGGTGCTATTATGACTCAAGGA  
TGTGATATTTTACAAAGGCGAGGTTTCGAGGTGGATCTCAGGCGTATGGTGGTCTTCTGCTCTCATTGTGACTGCCTCTATACAGCCAACAT  
GTCGACTTTCCTTAGTAACAGTGCAGAAAGCTACGAGATCAAAGATGTAAGGAACTCTCCAACAGAACAAAATTTCTTATGGAGTGTGTAC

AATGCGTCCACATACAAGTTTTTCCAATCTTCAAACGACACAGTGTACTCGAAGATATGGTCAGTGATGAGTTCAGCAAAGCCAACAGTTTTTCCAC  
CTACAGTAAACGATGAAGGAAGAGATCGTGTACTTAGGATGAAGGGAACCTATGCATTCTTCAATGGAATCAACTTCCATTGAATATTTTATTAAGA  
GGAATTGCAAAATTGAAAATGCTCGGTTCTAAATGGATTCTAAAGGAGATATGGTATCGCTATGCCAAAGAATATCCACACAAAAGGAAAGATTGA  
TGGAGCGATTTTTACTTCAAGAAAAGGTGAACCTTGAGAAAATGAAAAGAAATGGTGGGAAGACGAGGATAATGAAGAACATTGCGAGAA  
AAATGTC AAGGAAGGACGACAACGCTCGCTGCAAGATGAAAATACCAGTGGTATCTTTTTAGTACTGGGTTTCGGGAGGACTCTTGGGCCTT  
GTAGTAGCCATTATAGACTTCTTGTCCACGCTCGGCAATCAGTGTCAAAGAAAGGGTGCAGTTCCTGGAGGCGCTATCAAGCGAATGGCAGC  
CATCCTTGAACCCACGTGAGCTGCACAAACCTGTGACACCACCCCTTCGCGAGCCCCTCTACAGCCAGCCCCTCCCCGACGCGAGAGCGGTCT  
CAATCTCGAGCGGTCTCCGTGCTCCGGGCGGCCACGCTTTTCACTAATTTGATGAAAATTTA

>SnonGluR3

AGGGGAAGCTATTTTATTATTCTTACAGCTTTGAGTGTCCATATGGTATGCTTAAAGAGTCTGCAAAAAAAGCTTGTGGTAAATGATCGATATGA  
AGGATTCGGTATTGAACTTATTGAAGAATTGGCAAAAATGAATGAATCAATTAACCTTCAAAATACAGGAAGATGGTGAATATGGCGCATAAC  
AACAAATAAAACTAAAAATGGAAATGGCATGATGGCGAAAATAATGGACGGTAGAGCAGATTTTGGCTATAACGGACTTGACTATAACAGCAGCT  
CGACAAAAGCAGTTGATTTACCAGCCATTTATGAATTTAGGAATAACTATATTGTATAAGAAACCGACCAAAGAACCACAGACTCTTTTTC  
TTTCATATCACCATTTTCAATGGGAGTATGGGGATGGCTAGCAGGAGCGTACGTTGGTGTATCTGCTCTTTTATTTATATTAGGACGACTAGCACC  
AGAAGAATGGCAGAACCTTACCATGTATTGAAGAACCGGAACTTTGGATAATCAGTTTACCTTTGCGAATTCCTTTGGTTTACGTTGGGA  
GTGACTAATACTCAGGATAGAGTGTCTATGATGCCAATGCTTGAACCTGGAAGTATGGTGGTTCTTCACTTAAATCATGGTTTCA  
TCTTACACTGCCAATCTTGCAGCTTTCTTACAGTTGAATCCAAGTTTATGCTATTTAAAGTGTAAACGATCTTGGCAATAACCCGTATGGAATA  
ACTTACGGAGTAAGCAGAGAGGTTGCTACTTTTCAAGTCTTTAAGGAATCAGATAATTTACTTTATCAGAAAATGTATCGATATATGGAAGACCA  
TCCAGAATATAAACAGCTAGCAATGATGTAGGTTGGAGAGAGTGAATCCAATGAGGAAAACCTATGCATTTTCAATGGAATCGACATCAATC  
GATGTACTGTGTTGAAAAGTGCATGCGAAGTGGTGGTGTCTATTAGATAGCAGGAGGTTATGGAAATCGAAATCGAAATCAACTTTCACCT  
ATCGGCAACCAATGAGTGTGCTATATTACAACGCAAGGAAAGGAAAACCTAACAGAAATGAAAGATAAGTGGTGGAAAGAAAAAGAGGC  
GGCGGTGTGTGCGGATGACGACGCGAGCGGCGGTGAGGCTCAGCCCTAGTTCTCGGAACGTTGGGAGGCGGTTCATTGTACTCGCGGCCG  
GCTCGGGATGGTACCGTCTGCGCCTTTGTTGAAATGATCTTCGACGTATGGATGATATCTCGAAAAGTGAAG

>SnonNmdaR1

CGCGATTGTTGGTATCTCATCCGCTGACTGGAGACTTCCCCAGCAGCTGTATCTTACACCAGCGGCTTACCACATTCCAGTTCATCGGCATATC  
TTCAAGGATTCCGCTTTTTCGGACAAGAACATTCAGTATCTTTCTTCAACTGTCCCACCATATCCCACCAGGCTGAYGTGGTGGATGAT  
GTTGAAACACTTYAATAYATGAAGTCAATTCATTCATAGTTCTGATCTGATGGTAGGGCTATTTGGGACGGTTCAGACGACTTCTCAA  
GTGTGGATGAGGATGTAGACCGTAAAGTAGTTGGAGCAGGTGATGAAATTCGAACCGGGACTTGATTCCTTCAGCGATCGGCTCATGGATG  
CAAAGCGCTCAGGATAGAGTGTCTCATGTATGCCAGTAAAAACMGATGCTGAGGTAATATTCCGCGACGCAACGTTCTTGAACATGACGACC  
GTCGGATACGTGTGGATGGTACGCGACGAGGCGTGGATGCTGCAACGACCCGAGGTTTGTGGACTACGACTTGTAAATGCTACCAACG  
AACACGCGCAYATYACAGGATTTCTATTCAGTCTGGCATCAGCCATTCGTGACATGAACACATCCGAGGAGATCCATGCCCTCCATCAGACTGC  
GACAATTCAGGTTCTATCTGGACCACAGGCCGTTCTTGTTCGACTACATCAGGAAGCAACGCTTAGAGAGCGGTGCCACGGGTCATGTAGCCTT  
CGACACCATGGATGGATGTCATGCGGAGTACGATAGTGGTGAATGTGAGAGCAGCGGGGAACATGTGGCTGTGGCAAAATCTTTTACTCT  
AAGGAACTCAGAAGATGCGATTGGAACATAAAAGAGCAAGAGATAATATGGATGGGCCGTAGTACTTCAAAACCKGAAGGATTTATGATACCG  
ACGCATCTCAAGTGTGTGACRATTGAGGAGAARCTTTTCGTTTACACTCGTGTATGACGATGGCAGTACTGCCTGGAAGAGATCCCTTG  
TCCTCATTACAATGCTACTGAGGATACAGACGAACTTACTGCTGCAAAAATGATTTGATGGATCTACTAAAAATCTATCAAAGCGGATTAAT  
TTACTATTTCTTTGGCATTTCACCTGATGGCAATTCGGAATCAATTAATCTGTAACCTTCCCAACCGGAGCCAAGAAGGAATGGACAGGG  
CTTATGAGGAAATGGTGTATGAACGCTGATGATGATGAGTGGCCMCTTTGACCAATTAATCTGAAACGAGCCGAGTTTATGAATTTAGTAAGCC  
TTTCAAATATCAAGGATTACCATCTTAGAGAAAAAGCCGTTCCCTTCTTCAACTGGTATCGTTACTTG

>SnonNmdaR2

TGGCCAGGCGGCTTACACTCCACCTCAGGGCGTGCCGAGAAGTTCACATGCGCATCACGTTCTTGGAGGAGCCCGGTACATCAACCTGG  
CTCCCGCTGACCCCGTGAAGCGGCGCTGTTCTGCTGACCCGCGTGTATCTGTGCGGTTGGCGCTGAAAGTGAAGTTGCCGGTTTGGAAAGCCGGT  
GCAGCGCACGGGAACAGCTCTCTGTATCAGTGTGCAAGCGGTTCTGATCGATCTGCTACAACAACCTGGCGGAGCAGCTTGGTTTCACTTACGA  
GCTTGTGCGTGTGAGGACGCGCGTGGGGCACATTGCAACGCGCAAGTGAACGGTCTCATCGCAGATCTTGTCAACAAAGAAAACGGACATG  
GTACTAACATCACTGATTATAAATCTGACAGAGAGGCGGTAGTGGACTTTAGTGTACCCCTTTATGAAACCGGAGTTGCAATCGTAGTGGCCAA  
CGGAACAGGCATCATATCTCCAACAGCTTTCTGGAACCTTTCGATACAGCCCTTGGATGCTTGTGGAGCTGTAGCAATCCAAGCGGCTACTT  
TCTCCATATTTCTTTCGAGTGGTGTCTCCAGTGGGTTGACTGTTCACTGGCAACAATTCAAAACGTGTGCCACAGAATCGATTTTCTTTAT  
GTGCAACTTATTGGATTGTTGGGCAGTACTTTTCAGGATCAGTGCAGTGGATTACCCCGAGGTTTACCGCCGATTTATGACCAATATGT  
GGGCTATGTTTGCAGTGTGTTCTGTATCTACACTGCCAATTAGCCGCTTATGATCACGCGTGAAGAGTACCATGAGTAAAGTGGGTTA  
GACGACCCAGGATGAGGAGGCTATGACTCAGCAGCACCCGTTGAAGTTTGAACAGTACCATGGTCSAYACAGATGGCAGCCCTTGMWAA  
TACTTTACGGAGCCCCATGCATACATGCTCGGTATAATCGCAGTACCCGTAAGTGCAGCGTACGCTGCGTTCTACGGGTGAATCGACGCTT  
CATCTACGACGGCACTGTACTAGACTATTTAGTATCTCAAGATGAAGACTGCAGGCTTTAACTGTAGGTGCATGGTATGCAATGTCCGGTTATG  
GATTAGCGTTCACAGTAATTTCAAATATGTCAGTATGTTAATAAAGAGTTACTCGACTTAAGAGCTAAAYGGAGACTTAGAGAGATTACGAAG  
ATATTGGATGACAGGGACGTGTAAGCCTAATAAGCAAGAACAACATATCCGACCCCTGRTYGTGGAACAATTTTGTGACCTTTCTTGTGTC  
TGATGGCGGCTACTCTCAGGCACTTCTGTGTGCTGGAGCAGCTACTTCCGATACCTGCGCTCACATCTCGCCGATCCAGTGGCGGCG  
TCTTGTGGCAGTGGTGTCTTTGTCTATGGT

>SnonSNMP1

ATGATGATGCCTAAGGAGCTGAAGTATTCTGCAATCGCGGGCGGAGTGGCAGTGTTTGGACTCATCTTCCGGATGGTCTCTGTTCCCTGTCTACT  
CAAGAGCCAGCTTAAGAAGGAAATGGCACTCTCAAAGAAGACCGATGTCCTGTAAGATGTGGGAGCAGATWCCCTTCGCCCTGAATTTCAAAGT  
ATACCTGTCAACTACACMAATGCCGAGGAAAGTTGCTAAGGGAGCCAAACCTATTTTAAAGAAGTCGGACCTTATCATTTTACGAATGGAAG  
GAGAAAGTCGAAATGAAGACCACGAAGAAGATGACAGCATCTTACAAGAGAAGAGACATTTACTTCAATCTGAGCTCTCTGCGCCTG  
GACTAACAGGGGAAGAAATTGTGGTTATGCCGCATATTTTTATGATGGGATGGCGTTAAACAATTAACCGAGATAAGCCGCGCATGTTGAACAT  
GGTCCGCAAAGCATGACCGGTATCTTCGACAACCTACAGACATATTCATGAGGTTCAAAGCTTTAGACATTTTATTCAGGGGCATCATATTCA  
ACTGTGCGAGGACTGATTCGCTCCGAAGCCACTGCAAGGCTTAAAGAAGGAAAGCCGTTAAATGGACTGTGTTGAAAGCTTAATATCAGTT  
CAGGTTTTTCTGTTTTTCCGAACCGGAAACAACAATAGATCCGATGTAATAACAGTAAAGAGAGGCATCAAGAAGTGTGATGTTGGCCAA  
GTGGTGGCTGTGATGGGAAGCTGGAGCAGACGATATGGAAGGACASCTGCAATGAATACAGGGAACCTGATGGGACGGTGTTCACCCCTTC  
TGCAGGAAACAGACCGCACTCCAGTCTTTCTTACTGATCTATGACGGTCTTCAAACCATGGTACCAAAAAGAGACTTCTACAGGGGCATTAAG  
ACCAACCGCTACATAGCCAAACATCGGGAACCTTGGCGAGGACCCAGAACCTCAGTGTCTTTGTCCTGAGCCTGGTAAATGCCCTCAAAGGCTT  
TATGGATCTGGCGCATGCTATAAAGCTCCAATGTACGCTTCTATGCTCTATTTCTTGGACTGCGATCTGCTCTGCTGTAATAATGTGAAAGGAT  
AAATCTGTAGCAATCAACATGGAATGAGATTGATTTGAACCGATATCTGGAACCTCCGATGGTGGCCAAACAAAGGATTCAGTTTAACTAC  
AGCTGCTAAAAACTGACAAAATAGACATTTTCAAGGATCTTTCTGGAGATATAGTACTTATTTTGGATCGATGAGGTTCTGGCTTAAACAAA  
ACATTTGTGAACATGCAAGCAGCTGTCAATCTTCAACGCTGTGGTGGTGTGCTTCGCTGGTGGATGGTATTTGAAAGCTTGGAGC  
CGTCACTCGGCATTGTATACCACTTCAAGGATCAATAATGCGTCTTGCAGTTTCTGGTGCACAAAAGTGACAAAAGTGACACCAGAGGAGGAG  
ACTGAGCAGAAGGACATCAGTGTATCGGCCCGGTGCAGGACAGCTCGAAGAAACAATA

>SnonSNMP2

ATGTTGGGAAAACATTCGAAATTGATGTTCCGCTGTGCTATGGGGTTGTTGGTGGTCGCCATCATCTGGCCTCATGGGGTTTCGAGAAAAATTGT  
TGACAACAATAACAGAAAAATGTCCAACAGAAAAACAAATTCGATGATGTTGCACAGATGGTTGAAGTCCGCCTGCTTGTACTTGAAGTTCAAGGTG  
TATGTTTCAACGTCACCAACCGGAAAGACGTTAAGCAGAGGTCGAAACCCATGCTGAAAGAAAATTGGACCTTATGTTTACAAAAAATACCGTG  
AGCGGACGATCTGGGATATGGCCCAACGATACCATCAAGTACATGTTGCGCAAACGCTTCCAATTTGATGCCGAAGCGTCCGGTGGACTCAC  
AGAGGATGATGAAGTACACATGTCATACACTTCTTACTTGGCTGCCTGTAACTGTCCACGACATGATGCCAAGTTTGGTGGGAGTAATAAACAA  
AAGCGTGGAGCAGTTTTTCCCGAGCCTCGAGGATGCCTTCTGAGGATAGAGTGAAGATCTGTTCTTTGACCGCATTACTTGAGTCCGAT  
GGTGACAATGCTGTTTGGGTCTGTGTGCGGAAAAATAAAGGAGACCTACCCTCAATATGCGGCCAGCTGAAGGAGCTAATGGATTTTATT  
TCTCTATGTTTCTCATAATGAACCGTTCAGAAAACAGGTCCTTACGAGATGAAACGTTGGTCGTGAGAACGTTTATGAGTCCGGTAACATAGTTACC  
TACAAGGACCAGCATACCATGCAGGTGTGGGAAGCAAACTACTGCGGTGAGTCAACGGTTCAGACTCCTCCATATTCCTCCTATTAAAGGAGG  
GCAATGTGCCGAAGAAGCTTTACTTTGAAACCGGATATCTGCAGATCCCTTTACGTAGATCTTGTGCGCAAGAGGGGAGAAGTTCAACATCAGC  
TCGTAATAATGAGATCTCAGAGTCAGCGTTGGCAGCAAAAGAGCCCAACATGACAACAAATGTTTTGTAAAAGAACTGGAGCGCAAC  
ACGACGGGTGCCTCCTGATGGGCTACTGAACTGTAGCCTGACCGAGGCGACCCGCTGCTGCGTCCGCTTACTTTACCTGGCCTCGAA  
GAAGTGTGAGTCTTCCAGTCTGGAATCATGCCGATAGGGAGAAACATAACTCTTTGTTTATATTGATCCGACGACCGGGTGTGCTTACCTATGCTGT  
GGTCTGAAGCGGTTGCAAGTCAACATAGAAGTGCAGCAAGATTGACATCATCCCGAGCTGAAGAACGTAACCTACTGGCTGTGCTCCATGCTGT  
GGTCTGAAGAGGGAGCGACAATCCAGCCTCAATTCAGCAGGAGCTCCGAGACTCCCAAGCTCCTGGCTACGTGGAAGTAGCTCGATGGTT  
GCTGCTCACAATAGCAGGTTGTAGCGTACGCGTACGCGTGGCAAGAGCTAACCGCTGTCTTGTGGCCACGTAACAGTAACCTCG  
TTAGTTTTATATTAGTCCAGCCTTACACAGGTCATAAAGGAAAT

>SnonCXE1

ATGTTTATTACTTTAATATTTCTATTACTTTGTGCCGTGGTGGTCTGTGAGTGTGTGCTCGGAGAATGTGACTGTTGAAACAAAGAAAGAACT  
ATTGTAGGGTTTTAAAATGATGGGTACAATGTGTTCTTTGGTGTGCCGTACGCAAAAAGTGGATGAGGGTAATCCTTTTGGAACTACTTAGACCA  
CGAAAACCTTCCAACARCCGTTTATCGCTAACGACTCMTCCATAAATGCCCCAAGTTATCTCCAAAGTCCGTGGAGTACTCCAATGTCTTCGCC  
TAAACATATATGTACCTCACCGGCAATGAGAACCACCTGTACCAGTATTGGTCTGGTTCATGGAGGAGGTTTCTACTTCCGCGAGCGCAAC  
GACTACGGTGGCCAACTTTGGCTAAACATGACATCATTGTTATCACCCTCAATTAGACTTGGTCTTATGGATTTCTATGTTTGAGCAGATGAA  
TCCGTACCAGCAACAAAGGACTTAAGGACCAGATTGGAGCGTTAAGTGGTGAAGGAGCATAAGGGCTTTTGGTGGGGACTCCTGAAAA  
GTCACCATTAAGGAAAAGCTATGGTGGTGGGGCAGTAGACTTCTTATTCAATGTATGAAACATTATTAATAAAGCATAAATCGAAAG  
TGGTCCATTTTCACGCCAGGATTTATAGACATGGWATGATAAAGCTGCTGTGACATTAGCCAAACACATGGGACACAGAGTCAGAACGACT  
AGAAAAGCATTAGAGGCACTAGCAAAAGAGGATCCTATTGATGTCATGACTGCAGCAAGAAATCTTACTATGAGACTGACACCTTGCAGAGAA  
ACCCGCTTCAGAAGAAGCAACACTTTGTAACCAAAATGCATCAATCATTAAATAACACAGATAGAATAAAAAAATACCAATCATGATTGGCT  
ACAATAGTAAAGAAGACTTTGGTACTTACGCTAACAAACAGCAAGCATTCTACGACAATCTGCAAGACATATTCTTAAAGACTTGCAGAACAA  
TTTTGATGTAACAAAATCTGAATTAGAAAAATTAAGTGATATAGTAAGAACATTCTATTTGGGCGCAAGAAAATTTGGTCTGAAGCTATGTTGG  
AACTGAGCGATTATTCTTCTGACTTTAACTGAATTYTGTGTAGAAAAATCTGTGGCAAGATATATGGAGCAGGGTGGAAATGTATATAAGTAT  
ATGTTCTCATATATCGGTGGGAGTGAATATCAGAATGTGACAGGACCCGGGGTATACATACAGAGGAGCTGAAGTATTGTTGAAATGACTT  
TTGAGCTGAAATCTGATGAACAGAGGATGATAAGGGATGAAGACTGACTATGTTGGGCTAACTTTGTGAAGTTTGGAAACCCAGCCTGAAAA  
GACACCACTCCTACCAGTGCCTGGAACTGTACCAGGCAACACCCGACTTATCTGAACATTGACGTAACTATGTCAATGGAGGACCACGCG  
TACAGAGAGCGAATGGCTTTCTGGGACTTTTCACGCAAGAAGTATGAAACGAAGAGTTTATGTAAGAAGATGTACAAT

>SnonCXE2

ATGGTTAACTTTTATATTTTATTTGTTGTGCTGGCTTATTGTAAGGCCGAAACTGTGATGGTTACTACCAGTAAAGGTTCTATTTGGGGACC  
TCAAAATATGGATACAATACTTATTTCGGTGTGCCCTACGCTAAAGTTAACGAAGATAATCCTTTTCGGGCTACCTCGATTATCCAAAATTCAA  
GACGCCATTCATCGCAACGACTCTCCATAATGTGTCTCAAGTATATTTCAATGACAATGGAATACTGCAGTGTCTTCGTCTCAACATATATGT  
GCCACATGAGGCCATCACAAGCCCGGCCAGTATTGGTTTGGTCCATGGAGGGCGGCTTTCGGCTTCGGAAGCGCCGCGAATATGGCCGCCAA  
CATTGGTCAAAAAGACATAATTTGGTTCACAGCAAAATACAGCAAGGACCTTATGGATTTGTTGTTTAAACGATGCTTACGTCACAGGCA  
TCAGGGTATGAAGGACCAAAATGAAGCTTTGAGGTGGATTCAAAGACATATATCTGATTTTGGTGGTATCTACTCAGTCACTATATCCGGTG  
AAAGTACGGTGGAGGTGCAGTAGACCTACATCTGTATTCAAAATATGAGACCCTATTCGACAAAGCTATTATTCAAAGTGGCTCGATATATGTT  
ACTGAAGGAATTTTGGTGGACCTGATCATAGAGTGCATAAATTAAGTTGTCTAATCATTTAGGGCATAATGTTAAAAAGCAGCGCAAGAAGCTCTCAA  
GGTCTTTGCAAAAAGCAATCCTATAGCAGTAAACAAAGCAACTAGAGAATAAAAATGATCCTTACACTTTGCAAGGAAGCTAAATTTAAAGG  
CATCGAATTTTCGTGACAGAAGACCTTTCCATATGAGAAATACATTAAGGTTAAGAACACGAAAATAATGATCGGTTACACAAGCAAGAGA  
TGTTATATGAGTTCGCAAAACAAACCGGAATCGTTTTACAACGAATCTGGGAATCCATTTTACGTACAGTTAATAACACATTCGTTATCCCGAAA  
CATGATCTAGAAAAGCTGAGTAAGTAGTCCAGAAATTTCTATCTAGGAGGGAAACCAATTTGGTCCGGAGGTACAATTAGAAGTGAAGTAACTTTT  
TATCAGATTTTGTGTCAACTACGGTGTGAAATGGTCAGTGAACAGATATATTGAACAAGGGGCTAAAGTTTACAAGTTTCTATTCTCATATAT  
GGTGTAGTACTATCAGAATATACTGGTGCAGGAGCAGCAGTACGGAGGAAGTATCTCTTTGACTGGGTTTGGGCGAAACCATTGA  
CCTGAAAGAGCAGATGATGATCAGGACAGAATGACAACGATGTGGGGCAATTTGTTAAA

>SnonCXE3

ATGGTAGAAGTCAAAAGTGAACAAGGATGGCTGTCTGGAGAACTAGTGGAGACTGTTACAGGTGATGGAAAGTACTACAGCTCAAAGGCATC  
CCCTACGCCCAACCCCGTGGGAAATTRAGATTTAAGGCTCCGCAACAGCTCTTCCATGGGAGGGTATACGAAAAGCTACGGAAACATGGAC  
CCAAATGCCCTCAGAAGTCTTACAGATACTATTGATCTAGGAAGTGAAGACTGCTTGTACCTAAATGCTGATACCTCCGACATCATGGCG  
GCTTCTCCATTGCCAGTATGGTATTATCCACGGAGGAGGTTCAAGAGCGACTGTGTAACGATGAGAATTATGGACCAGATTTCTTGTCCC  
CCACGGCTAGTCTTGTACATTTAACTACAGATTAGAAACACTCGGTTTCTTGTGCTTAGACACTGAAGAAGTCCCTGGAAATGCTGGATTGA  
AAGACCAAGTTGTCTTTCGATGGTTTCGGGATAATATTAGGAGTTTTGGT

>SnonCXE4

ATGAAGAACTCTTTGAAGTCAATTGTTGAGTTTTAAGATGTTAGTGTGATCTCCCTGTGGGTTGGCTCCGTTGTTGCCTCAGCCGACAGCACCAGG  
CAGCTGAGTGGTGGGAGGTTCCGGGCTCGGTTGCCCGGACGGATCATACTACAGTATTTCGGTATACCTTATGCCACCCTCAGACACAGGTT  
CCAAGAAGCCGAACCAAAATCCGAAATGGGAAGGTGTGTTCAAAGTCAACAACGAACACATCAGATGAAGCAACGCTTACCAGTACTCGCAT  
CCTGGGAGACGAAGACTGCCTCACTGTCACGTTACACCCAGTCAACGCAAGCAGCCCTTCCAGTATGGTGTTCATACATGGAGGA  
GGATTACAGAGTGGTTCGGGGCTCCTCCTTACGTTCCAGTCCAAGTATTGTCAAAAATGGAGTCACTTTAGTCAACTATAGACTAGGGA  
AATCCTAGGCTTCTATGTTTAGGCATCAAAGAAGCACCAGGCAATATTGGACTGAAAGTCAAGTGAAGCAAGCTCAAGTGGGTGAAGAGGAAT  
ATAAGAGTATTGGAGGCAATCCGGATAACGTGACCAATTTTCGGAGAAAAGTGCAGGAGTGCCTCAGTTTCTACCATCTACTATCTCAATGTC  
TAAAGACTATTCAATAGAGCTATCATGCAAAAGTGGCTCAGCCTTAGGGTATTGGGCTTTACAACCTGAACTTTGGAGACAGCGAGTCTACTCG  
CCCAACAAATGGGTCACACAACAACAAACCTTAAAGATATACAAATTTATCAATAACATGACTGCTGAAGATCTGTGACCTATAGACTGTTCTT  
AGAAAAGAAGGTGATGTTGTGATATCAGAAAACTTCTGTCGGTGTATTGAACGAAAAATTCATGCGGTAGAACCATTTTTGCTGACAGTCC  
TTATAATTTGATAACACAGGGCAAAATAACAAGGTTCTGTTATAATTGGCTTTAATAGCGTGAAGGTTTATATTTGCTGTAAAGAGAAGC  
ACACTACACTGGCTAAATAGATTTCTATAACCGCTTACCAAGAGACTGACTTTCTTTCAGATGAGGAAAAAGTGAAGAACAGCGAATAGGTT  
AAATGAGTATACATGGTAAATGAAAAATACGAAAAAGACTTTCTGTTAGAAAAAGTTGGCACGTTTTCGAAGGAGACCGCGGCTACTTAC  
CCTGTATTAGTACCATGGATTTATTCTACAGACTCTAAACAGCCTTTGATGCGTACAAAATCAATTACGATGGGTTACTAAACTTCGCTAAG  
ATAATATTCGGGTTCCGCGGTTCCCGGGGGCAGCAGCAGATGAGTTATTCTATCTGTTACAGACCTTGACCTTACGGCGATTGCCGGAAGT  
TAGGTTTCATGACAAGTTTACTACAATGTGGACAAACTTTGCCAAATACAGTGATCCACGCCAGCATCATCTTCAATTCACCGAAATGGGAGC

CAGCATCGGCGCAGGAACCTCGTCTACTGCTGATCGACAAGGAATGCTCCATGGAACCGATGTGGAACCAATCTGACGAAGCCCTCCGATTTTG  
GAACACGACATATTCTTTATATAGGAGAAAAAGAA

>SnonCXE5

ATGTTTTCTGGCGTGTCTGTGCGCGCTGTGTGTGCGCGCACGACACGAACACAACCACTCGCATCAACATGCACAACAACACATGACTCAG  
TTCCAGTGATAGCAGACTACCTACGTTATCATCAACCCGGATGGGCGCTGACCAGCGAGCGTGTGGGCCAGTTCCGAGGCTCGTGGATGGA  
GACGAGGCGTGAAGGCGCTCCAGGCGTACCGCGGGATACGATACGCTGAGCCGCTATTTGGCGCGTGTGGGTTTACGCCGCGAAACTGAA  
CTGGAGTACGAAGGTGAGGTGATGCGAGCGAGGAGGCCCCCGCTGCCCCCTGCCCCGCGCCACCTACTACGTGGACGAGGACTGTCTCA  
CCATCAACGTCTACACGCCGATAAAACGTCAGCGGCCCTACCAGTAATCTTCTCATCCATGCGAGGAGGTTTCTACTCGATGACAGGTCGC  
AGTGACCTGGCAGGTCCACACTACTTACTCGACAGAGATATCGTCCTGTTACCATCAACTACAGGATTGGATCTTAGGTTTCATGAGCAGAG  
TGATGCATTTCGACCCGGTAACAACGGCATGAAGGACAGGTGGCAGCCCTCAGGTGGGTTTACAGGGAACATCGCCGCGTTCGGAGGAGACCC  
CAACCTAGTTACCATACCCGGTACGTCAGGTTCTATCAGCGTCATGTCATATGATCTACACTAAAGGACTTTCCACCCGCGCA  
TCGCAATGAGCGGTCTCCCGTCAACAAGGATGTGACACCCCTGACGCATCAGCGCCACTCGCTGTGCGCAAGCAGAGATCTTCAACTGTCC  
CAGCGATAACTCTCTATCTTCTGCTTGCCTCATGACCAAGCCCTGGAGGAGTACGGAGACTCRCTACTAAGTTTGGGAGTTCCGACCAG  
GGGACCCAGTGGGTCTGTGGGTTCCAGTGTGGAGCCAGATTTGCGACAGGAGAGGTTACCTGACAATCAACCCATTGGACGCCATCAAGGAAG  
GCAAGATGCACACCGTCCCTTCACTCTCAGCCAGACTACTGAGTCTTCTTGGAAAGGCTTTCCGCTCCTCAAAAACGAGACCCTCTAAAG  
ACTATGACCTAGCATGCGGTTAAAATGGGTTCAAAGAAACATAAGTGTCTTTCGAGGAAACCGCGCGTGGCGGTGAAGAAGCTGCAAGGACT  
ACTTTAAAGGGGAAGAAGCTGGTCAATGATACAGAGAGCGAGAAGGCACTCGGACGGCTGTATGGAGACTCTATTATTGGGTTGGAGTGCACAG  
GTTGGCGAACCTGATGTGTCTGCTCAAGCACCCGCTGTGGTACTACGAATTTGGGATATTGGAACAACCTCACACTGAAGACCCCTAATG  
GAAAGCCACAAGGCGCTGCCATCATGACGACCTTCTGTACGTGTTACGCTGAGTACCCGCTACCCCACTATAGCACTGAGCAGTCTCACTCA  
CAGCTGTGACGAGGTTGACTCAACTTCGACAGATTTGAGACCCCAACCCGCTCGTGGCGACACCCGAGCTTCCGCAAGCTGA  
CCTGGCCAGCCATGAAGCCGACATGAGGAGTACCTCCACCGAGGAGACCAGCTTATTATCGACAAAACATGTTTGAAGACCGGTTCAAGG  
GTGGGAAGAGCTGTACCCGATACAGTAC

>SnonCXE9

ATGGAATCAATATCTGAAGAATTAATAATGTGTGTGAAAAACAAAAGTGGCCCTATTGTGGACTTATTGATAAAACCGATGAAGGAACTTATT  
ATAAATTGGCAGTATTCATATGCTAAACCACCTGTGGTTCGTTAAGATTTTTGCCACCGATTCCAATTGACCCATGGGTTCAAGTAAAAAAC  
TGCCTCAAAAATGCGCTTTGGCTCTATGTGTACCATAAATCAGGAAATAATAGGTTTCAAGAGCTGCTCTATATTGAAATTTCAACCCCAAG  
TATAAACCCCTAAGAACTTATGCCAGTTATGTTCTGGATAGGGAGTTATGGATATTGAGTCTAATTGGATAACTTATTGATCTCCTTGATCAA  
TGACCAAGATGTTGATTTGTAAAGATGCGGCTTCCGATTGGGACCCCTCGGTTTCTCTCTATTAATGATTTACAGCACCCGGAATTGTGGACT  
AAAAGACTTAGTATGGGTTAAAATGGTTCAAAGAAACATAAGTGTCTTTGGAGGAAACCCGATAATGTCATATTGGAAGTTCAAA  
GGTGGAGCTTTGGTGCATTTTATGATGCTATCCCCAATGGCGACGGGTCTGTTCCATAAAGCCATCGTGCAGAGCGCTAGTGCATTAATAGTTG  
GTCTTTAGCTAAAAACCCCTTCTCAAAATGTTCTGTATCTGGCAATGAATTAGGCAATAAAGGAAACTTCGAATATAGAAGTGTGAAAAGCTAC  
GTACTTTACCAGAAAAGACCTAATGAATGCAATGTTAAAGATGTAAGAAAACAAAACAGCAGCAAAACCATGATGTCTTTGATGCCRCTTT  
CAAGCCGTGACGGAAGTTGACTTTGAAGGCCAACACGATTTATCACAAAAAGTCCACCCATAATCATGAAATCAGGAAATTTCAAAAGTA  
CCCTTAATAATTGGAAGTAAATAATAGAAGGTGTGTAATACAATTCATAAAAAGAAGACTTTTATTTCGGATTACGAAAAAGTTAACGAGAACG  
CTAGTCTTATGTACCAGATCACTATCAGGAGAAGATAAATAACAAAAAATAAGTCAACAATTTGAAATTTTATTGGGTGGCGAAGA  
GCATTTAAGAGCAGATACGAAAACACAATTTTACAATTAATAAGTACTAKTTTTTATATTGTTAATAGAAGTGTAAAGTTACACAGTC  
AGTTGTCACCTGAATGCTCTATATACTACTATATTTAAATTTCCCTGGCAGTGGTGCAGTACCATCAAATTTAGAGTTCTGAATTTCTGCTGGAC  
ATTGTCAGAACTGCCCCGTTTTATTCCGTTTTAAGATGCGCAACAGCTTGCAAAAGGTAGTCGAGATTCAGTGAACAAGGACAGAGTGTCAA  
AATGTGGACAAAATTCGCTAAAACAGTAACCAACTCCCGATGACAATGATCCACTTTTGAATAAACTTGGGACCCCTGTGCAAAATAAGAT  
AAGCTTAACACTCTAGTATAGGCTCAGAGCTTACAAAAGGTAGAAATCCATTGATGAAAGAATGAAATTTTGGGATACTCTCCACCATGAAC  
ATGCATTTCTCAGGACTAGAGTTTATTTCAGTGATATAGGAATTTCTGTGG

>SnonCXE11

ATGACGGAACAAGTGGTAGTGAAACTGAACAGGGTAAAATAAGAGGGGAAGTGTGAAAGACTTCGAGGATTTCCGAGTATTGTATTTTCAA  
GGATTCCTATGCGAAACCCGCTGTGGCGAATGAGATTGTGATCCCCAACCCGGAATCTTGGGATGGAATCAGAGATGGAACCAAAAG  
ACTGCAACACATGTGCACAAATTGACAGAGTGAGAAGAGTCGTAACAGGAGATGAGGATTGTTTATATTGAAATGTTGATACGCCGAAATCTTTT  
ACAAGTGGCGAGTTATTGCCAGTGTGTTTTCTTTCAGAGGCGGTTTTGTTCTTTGGVAATGGTACAGAYATTTCTGCTCAGGTTCCAGTA  
TCTCATTCGTAATAAAGTAGTATTGTGACATTAACCTACCAGTCCGGATACTCGGATTTCTGGCTTTAAATTTAAAGGAGGCTCCAGGAAACA  
TGGGCTTGAGAGATCAAGTGAAGCACTAAAATGGGTTAGAAAAATATAGTGAATTCGCTGGAGACCCAAAGGTTGACTATTTCCGGAAT  
CAGCGCCGCGCTGCGAGCGTGCAGTATCTCCTTTGTGCGCCATGACTAAAGGTTATTCCTATAAAGCCATTGCTCAGTCGGGTTCTCTCTATT  
GCATGGGCTCACGAGATGTCAGAGCATTGTTTATTAGCTCGAAAATTTCTATGCTCCATGGTGAACATAAAGTGAAGGACCAGTTGT  
TACAATACTTAAAAAATGTCGACGAAAAGATTAAATGTGTATTCCATGAAGGTTTTATCGGATATAAAATCGCGAGGTTGTTATTTTCGGC  
TTGTGCCAATGTAGAAGCACCTACTGATTGGGAACATTTTAAAGTRAGCTCCATATGAGTTGTGAGTAAAGGAGAATTTCAAAAAGTGCC  
TTATATGACAGGGTTTTGTTACGAGAGGGACTTATTGATATCCCAAAAAAGCAATTCGAAAAATTCCTGCAAAAAAGGTTTTCACAG  
ACTATTTCCGTTTCACTTACTGGTTTCAGAAAGCACAATATAGAAGAGACTAAAGAGAACTATTGGAAGCTGAAAAATTGTACCAGA  
MCAGGATGCTTATGACATAGATTCTTTCCGGATGTCGACTTTATTGGAGGATTTATGTCGCTGCTACATTAATGCCCACCAACATAAGTCCCAT  
ATTTATGATGAGTCTCTTACGATGGAGCTTTTAAATACATAAAGAGTGTGTTGACATCAAGCTACAGGGGCGGTGTCACGGCGACGATGGCG  
GGTACATAGTGAAGAGTAAACAAATTGACCGGACCCCTCACTGATTAGACAGAGTGGTGCAGAAACTATGAACCAAATGTGGGTGAATTTGC  
TGGCTGTGGTATCCAACACCGAGAGTATGATTTTGGTGACAACGAAGTGGGAACCCACGACTGACACAAGATTAGCATGTTTGAATAGAT  
CGGAGCTGTCAATGAAGTACGAAGTCTATACTCAGAGGATGAACCTTTGAAAGAGATTTAAAAATAAAGGAAAGACTACGAACATT

>SnonCXE13

ATGTGCTGTGAGATTATTTCTGTTTTGTTCTATCGCTGGCTGGTTGTGCTCAGGCCCTAATCCTACCCTAAGAGTGGCTCAAGGGCTCTTCAR  
GGGACATGGAAGGTGTCCACCAAGGACGGTCTACGCCAGCTTCCAAGGTGTACCATATGCGCGGCCCGGATCGGAAAGTATCGATTTAGGG  
AACCTCAGCACCCTGAACCATGGCTGGAGTGTGGATGCCACCGAGCTCTTCCGCTGCCTCCAGTACGAACCAATTTGTGAAGAGCATTATA  
GGTAGCGAAGACTGCTGTTCGTGAACGTGTACTCCCAAGATGAACCGCTGTCGCAACCTGCGCGTATGGTTTCATCCTCATTGAGTGCCTT  
CATGTATGGGACGGGAGGTATCTACGACGCCAGCAACATCATGGATTGGGACATGGTCTGGTCACTTAAACTACAGGCTTGGACTTTAGGT  
TTCTCAGTACCGGTGACGAGATCGCCCGGTAACAAATGACTCAAGGACCAGGCTTTCGCTTGCAGTGGATTAAGAACAACATCCTGATGTT  
CGGAGGAAACCCCTGACAGCATCACGCTCACGGATGCTCTGCTGGAGGTGCCAGTGTCCATTACTACTATGTCGCTTTGTTGAGGACAT  
TCGCCGCTGCATAGCCTACAGCGGTTCCGCGCTCACCGAGTGGACCCACTCATCAACCAGCAGAGAGGCGAAGGACCCCTCGCTTCCCAT  
TGGATGCCCACTACTACCAACAAGGAAATGATGGAGTGCCTCAATAACAGGCTGTGAGGTATCGTCAACCGCGCAGATTGAGATGTTGAC  
TGGAAAGTGCACATGTTACGCCGTTACGCCCGTGGTFCGAGGACCCCGGGTCCGGGAGCCGTTCTGACAGAGTACCCTACCACGCCACCA  
GGTCCGGCAGCATGATGAACCTTGCCCTTCACTACGTCGGTCACTGTGAAGAGGGACTGTACCCGGCAGCTGCTACCAAGAAACCCCTGACAT  
CCTACCAGACTGGAAGCAACTGGAACCGAGTGGCCCAATATCTTCGATACAAATGATACTTCTCCGCTGCTCCGCAAGGACCCGCAATGAGGTCGCTA  
TGAAGATCAAGCAACACTATCTCGGAGGCAAGCCGGTCAGCCAGGACACTTTTGCGCAACTGTTTTCAGGCTCTGAGCGACCGCTGTTCTGAGC  
GGACGTGGGTAAGACGGCGCAGCTCCACCGGCTAAGTCTGGGCAGCCACATACGTGTACCGTTACGCTTCCGCGGAGCCACCAGCCTCTCC  
AAGTGTGTCGCGCACACGACGCCAATTACGGTGAAGCCATGCGGAGATGTCTGCGGATCTTCAAGTACCCCGGCTTGAAGCAACAAC





AATCTTACGAAGTGGAAAGCCCTGGTTATTTGATCATTGACAGAGTAACTTTACAATGAGTACGCCGGCTACGGTGAATTAAGCTTTTCGAG  
 TTCTGGACGGACTTTTATCCAAAAGTTGTCGAAATAGGGACTAAATGTTGCAAAGAGAATTATGATGATTCGGGAGCAAAAATCAATTTTCTCAT  
 CAAAATTATACACAGATTATTTATTTGTTTTCACCTTGTATTTTACTATCA

>Snon-Acyl-CoA delta-9 desaturase

ATGGCTCCAAACATAGCGGAGGATGTGAACGGAGTTCTTTTGAAGCGATGCTGCGACCCCGATCTGGCGCTCGCCACCCCACCAGTACAGA  
 AAGCAGATAAATTGCCAAAACAATATGTGTGGCGGAATATCTTACTATTTGCATATCTCCACTTAGCAGCTCTGTATGGCGGTATTTGTTCTCT  
 TCTCTGTCAAATGGCAAACAGACGCTATTGCTTACATCTTGTATGTGGCTCTGGGCTGGATACACGGCTGGAGCACATCGTTTATGGGCCACA  
 AGTCGTACAAAGCTAAATGGCCGCTCAAAGTGATCTTGGTCATCTTAAACACYATTGCGTTCAGGATGCTGCTATGGATTGGGCCGAGACCAC  
 CGTATGCATCACAAGTATCTGAAACTGATGCGCATCTCACAATGCAACACAGAGGATTTCTTCTCTCACATTTGGTTGGTGTGTTGAAGAA  
 ACATCTGACCTCAAAGAAAAGGCAAAGGACTTGACATGAGTGACTTACGCTCCGATCTATTTCTCAGATTCAGAAAAAGTACTATCTGCTCT  
 TGATGCCCTTTGGCGTCTCGTTATGCCACCAGGTTCCGGTGTACTTTTGGGGTGAACCTTGACCAATGCCTTTCTCGTTGGCCACTGTTCC  
 GTTACGCTTCACTCTCAAGCTCACGTGGCTCTGTAACCTGCTGCGCTCACCAGCTGGGAGACAAAACCTATGACAAGAGCATCAAACCTTCGGA  
 AAACATGTCAGTGGCGATGTTTGTCTTGGTGAAGGATCCACAACCTACACACTTCCCTTTGGGATTAACAAAACCGTGAAGCTGGCAACA  
 ACAAAATGAACTTCAACACCGCTTTTAACTTCTTTGCCAACTGGCTGGGCTTATGACATGAAGACTGTCTCAAGATATCGTCAAAGAGC  
 AGGGTGAAGCGCACGGCGATGGCTCTCAACCTGTGGGGATGGGGAGACAAAATCAATCCAAAGAAGAAATCGTCCGCTATTAGAATC  
 AATCCCAAGGATGAT

>Snon-Acyl-CoA delta-11 desaturase

GCTGTCAAAACGACTACAATGTTGAGTCAAGAAAGCCACACACTTCCGTTGGTGCCCTGAGCATCGCTAGAAAATACCAAATAGTGTATC  
 CTAACCTTATAAATTTGGGATTGGCAATTTAGCTGGCTATACGGGCTATAATTTGCTTCACTTCGGCCAAATGGACAACAATAATTATTCAGT  
 TCATCCTGTGGCTGATTGACAGAGGAGGGTCACTGCTGGCGCTCACCAGCTGGGAGACAAAACCTAACAAGCTAACCTACCCCTACAAAAT  
 CTCCTAATGGTAATGAACTCCATTGCCTTTCAAACTCCGCTATTTGATTGGGTGAGAGACCACCGTCTTTCATCATAAGTACAGTGACACTGATG  
 AGATCCTCATAATGCATCGGAGGTTTTCATTCCATGTCCGATGTTGCTGTGAAGAAATCTGAAAGTCAAGAAACGAGGAAAAGAA  
 CTTGACATGTCTGACATTTACGCCAATCCAGTGTCTCAGATTTCAAAAACAGTACGCCATTTCCGTTTCATCGGAGCATGTGCTTTCATTACCACT  
 GTACATCCCGTCTACTGTTGGGGGAAAACTGGACCAATGCTGGCACATCACCATGCTTTCGTTACATAACGAACCTCAACGTCACTTCTGCT  
 CAACAGCCGTCTCATAATCTGGGGTTACAAGCCTTATGATGAGAATTTTGGCATGTGCCAGAATATCGCAGTTTCCATTTGCAAGCTGTTGGTGAAG  
 GTTCCACAATATCACCACGATTTTCCATGGGATTATCGTCTGCCAGCTTTGGGAATAATAATCTTAATCTAACGACTAAATTTATAGATTTCT  
 TTGCTTTGGCTTTGGGTGGGCTTATGATCTGAAAACGGTGTCAAGTGATATGATAAAAACCTCAGAGCAAAGAGAAGGTTGATGTTTACGATCTATG  
 GGGGAACACAATGATGAATTGAAAGAAGGGAAAGAAAAT

>Snon-N-Acetyltransferase

ATGACTAGAGCTAAAATAGAAGCTCGGTGACGTGACTCCACATAATATAAAGCAACTGAAGAAGTTAAACACAGTTGATTTCCAGTGTCTTACA  
 ACGATAAATTTCTACAAGATGTTTTAGAAGCAGGTGAACCTGGCCAAGTTAGCATATTATAACGATATCGTGGTGGGAGCAGTGTGCTGTAGAAT  
 AGACACGTGGGAGAACTCGCGGAGACTTTATATGACTTGGGTGCTGTACCATACAGAAGACTTGGCATTGGTACTTATGGTGGAAAC  
 ATGTGCTCAAGTATGTTGACAGGACGGCCTTTCGACAGCATTTTCGACAGCATTTTTCGATGTGCCAGAATGAAGTTCCATTAAGATTTTAAAGAAG  
 TTCGATTCGAGATTGTGGAGACTAAAGAGCCTACTACAAGAGGATAGAACCAGCTGATGCACATGTGCTACAGAAAACGATCAGACAAACA  
 CAGCCTTCTGTACTTTACTGAATGGCACCTTACCTCATGACAAAAACCAATGGACA

>Snon-Acyl-CoA delta-9 desaturase

ATGCCCTCTCAAGGCAGACTAGTGGGTCTGCGTCTACGAAACAGATGTTGTGAATGAAGACAGATGCCACCACGCCATCGTACCAC  
 CTTCCGGCCGAGAAAAAGGGAATGGAAGATAGTATGGAGAACGCTACTCTTAATGGGATCACTCCATATAGGAGGAGTATATGGTCTTATCTATT  
 TCTTACCAAAGCGATGGGCTGACTAGTTCCTTTGTCTGTTTGTATATATGCTCAGGCCTGGGCATCACCGCCGGTGGCAACGGCTATGGGC  
 CCACAAGTCATATAAAGCGCGTCTACCACCTCAGGATCTACTTACTCTTCAATACCTTTGGCTTTCCAAGATGCAAGTAACTGACTGGGACCGTG  
 ACCACCCGATCGCATCACAAGTACTCTGAAACTGATGCTGATCCCAACAATGGCACAGAGGCTTCTTCTCGCCACAGTGGGTGGTCTGGTC  
 AGGAAACACCCGAGATCAAAGCAAAGGGGCACACTATTGACCTTTAGTGACTCAAGAAGCATCCCAATTTGCGCTTCCAGAAAAATACTACA  
 ATATCATCATGCGCTGATGCTTCCGATGCGGATGATGTTCCACCCTGTGGGTGAATCCTCGTGGAACTATTTCTCGTATGCTCGATCT  
 TCCGATACGTGTACTGTGAACGTCAGCTGTGGTGAACCTCCGCGCCACTTGTGGGGTCCAAGCTTAAACGACAAGAACATCAAAACCCC  
 GTGGAAACCAACCCGCTCCCTCGTGGTGTCTGGGCAAGGATTCACAACCTACCATCACACTTTCCCTGGGATTACAAGCCGCTGAACTAGG  
 GAACTATTTCCCTCAACCTACAAGAACTATTCAATGACACCATGGCTGTTATAGGATGGGCATATGACCTCAAAACCGTGGCCTGACGCTATCC  
 AGAAAACGTGTAAGAGAACAGGCGACGGCAGCCACTCCGTGTGGGGTGGGATGACAAAAGTGCACCAGGAGGACAAGAAATTAGCAGCT  
 GTTATTAACCCAGAGAAGACTGAAATAATCAAGCCGTTTGAACCAATTCCTTAACCTTTAGATCGAAGGGAGTACGTGTATTAATACATGTGTGC  
 GGGACATGTGATACCAATAATAATTTTATTTATTTATAAATTCGACGTGATAGTGTGATTAAGACTTTTGAATTAATTTAGATTTTCTTACAA  
 ATAATTTCCATCTGTTCCTAAAGACAGAATATAATAA

>Snon-Acetyltransferase 1

ATGGCCGTCGTATCAATAAAGGATCTTCATAGTAGCAGCCAAAGCGAACACCCGTTCCGTTAAATTTGGAGGTGCTTTCAAGGATGTGTACCCTTC  
 AGACCTGCTGGCTGTGTCAGTAAAGATGCTCTGAAAGCTGGCAGTGTGCGCCGAGCACTATCGACACAGTCAATATTTGGACAGGTTTATGGG  
 ATTAGCGGCTCATAGATGGAGGTTTATCTCCACGACACAGCAGCGCTTAAGGCTGGCATTCCAGAAGAGAAGCCAGCTTTGGAATAAACCAGC  
 TCTGTAGGCTCGTTTCCAGCTATCGTTAAACAGTGTTCAGGATCTTCCAGGATTTGCCAGAACTCGTATGACAGTGGTACAGAAACAATG  
 TCAGCAGTACCTTTCTGCTGAGGAACACCCGTTTCGGAACCAGTGTAGGAACGAAGATTCCTTTGGAAGATGTCTAACTTCGGGATCTTTGGA  
 TACATCGTGAATCTACTATGCCGAGACAGCTGAGAATCTTGTGAGAAGTACGGCTTGCACAGAAGCAGGAGTGGACAGTACGCTCTGCAG  
 TCACAGCAGAGATGGAAGCCGCGCATGACCAAGGTGTGTTCAAAGCAGAAATGACCMCAGTACRGTGAAGGTCAAGCCGCGAGGAGAAGGT  
 GGTGGAGGTAGACAAACCCCTGCCCTGATACCAACACTGAACTTACTAGCAGACTGCCCGTGTGTTTTCAGGAAGGAGGAGGCTTTGTTACTGCT  
 GGCAACTTCTGTTGTTAAACGACGGTGTGGAGCGTGGTCTAGCAAGCGAGGAGTGTGTAAGCAGAAATGGCTTTAAGCCCCTAGTGAGAC  
 TACTTGGCTGTGCTGAGTGGGTGTGATCCTTCCATCATGGGAATCGGACTGTGCTGCCATACAGAACCTGTGACTGCCACGGGACTGAAA  
 CTTGATGATATCGATTGGTTGAGATCAACGAGGCTTTTCGAGCTCAAACTTTGGCATGCGCTAAGGAACTGGGCTGCGACAGAGCAAGCTGA  
 ACGTCAACGCGGAGCTATCGCATGGGCCACCCGCTCGTGTTCAGGAGCTAGGATTAACGACATCTTGTCTATGAGTCAAGCTCAGACTCGAGC  
 ATTTGGAAGAGAGCCATTTGGTACAGCATGATTGGCGGTGAGCAGGAAATCGCCCTTCTTGGACTGTTTAGCTTACTA

>Snon-Desaturase

ATGGCTCCAGCACAACAGAATCGAAATGTTGGAGAAGAAATGAATTCGGAACCAAAAATGAGTCCCATACATAAAAAATGGCAAAGTT  
 GCACAATTAGAGAATAATAACAGTATTAAGAGATAGTATAGTGTAGTGAACAGTATTCTGACTTTGATATCAAAAAATATGAAGCCATGG  
 AATTTAAAGCCCAATGGCGATGCGCCGACCTTACCCTACAATACTTATGCAATTTAGTTTACATTATACGGACTGACTGATAAATAGTAAACAA  
 GTTAAGGTGTACACAATATTATTTGCATTTGCACGATATACAGTCCGGGTTCGGAATCACAGCGGGCGTGCACAGGCTTTGGTACACCCGGG  
 GTACCCGCGCGGTTACCGCTGCGGATCTGCTGCTATACTGTTCACAATAACTGACAGCGGACATCTACACCTGGGCCCTAGACCACCCG  
 GTGCACCAAAAGTATTCCGAGACGGTAGCTGATCCGCACGATATCAGCGAGGGTCTTGGTTGCTCAGCTCGGATGGCTGGTCTGACTCTCTCA  
 CCCAGCGTGGAAAGCCGCTGCGCTGCGACATCTGACTGTACTGTTCTGATCAGTGGTGGAGGAGTGTGCTGAGTGGTGGTGGTGTGCTTTATC  
 CCATGTTCCGAATACTTAACATCGGGCTTCCGTTCTTTGCCGTTGTTACTTTTGGAAACGAAACACTGTTGAAACAGCTTCGTATCATAGTTTCGTTCC  
 TGAGATTACCATCAGCTGAACATCGTTCGCTCAACAGCTTCGCTCATCTGTGGGCAACAAGCCTTATGACAAGTTCTGTAAGGACAGT  
 GAGAAGACCGCTGGTGGCTGGCAGCTTTGGGCGAGGTTGGCAACTACCACCACGTTTCCCTTGGGACTATAGGACTTCGGAGCTGGGCA

AGATAAACGTGTCCACCGGTTTCATCGACCTGTTCCGCCAAGATTGGATGGGCTTATGACTTGAAAGCCGCAACGAATGAAATGGTATCAAAGAG  
AGCTAGGCCAAGTGGAGACGGCACCTTCGGAGAGTCTGAAGAACCTTATCTACGTCAGAACATTGTCTATTCGAG

>Snon-Acetyltransferase

AACAGGCTCTGCGGATCAGGATTCCAGTCAAGTCTCAACAGCGCCCAGGACATCTTAACCGCGCTGCTAAGATCTCCCTCGTGTTGGAGTAG  
AGAACATGTCTCAGGCTCCCTTCGCGGTCAGAAACGTGAGGTTTCGGCACAGCTCTCGGCCAGAACCATGCCTTCAAGACACCTTATGgGCTGGC  
CTCTCTGACTCTACTGCAGCCTGCCATGGGCATGACTGCTGAGAAGTTCAGGTTGGGGCAAAGTTCAGTATCACACAGAGATGAGGTTGATAAATTCGC  
ACTTAGATCACAGCAGAGGTGGAAACTGCACAAGACCGCGGTTGCCACAAAAGCTGAGATCACCCCTGTGACCTTGACCGTCAAGAGGAAAGA  
GGTCAAGGTTGAGGTGGACGACACCCTCGCCCTCAGACCACATCGAGGGTCTGAAGAAGCTTCCCCCGTGTCAAGAAGGAGGGGCTCGTC  
ACCGCTGTACTGCTTCTGGTATTAGCGACGCGCTGGCGCATCTGTTCTGGCTAGCGAGGAAGCCGCAAGGGTCTGGAAGCCCTTCCAGGCT  
GGTGGGCTGGTACATCGTGGCGTAGACCCAGCATCATGGGTATTGGCCAGTACTGCTATCGAGAACCTCTGAAGGTACCAAGTTGACC  
CTCAATGATATCGATTGATTGAGATC

>Snon-N-Acetyltransferase 3

ATGACTACAATTAGACCATTTACGTGCGATGACATGTTAAATTTAAACATGTGAAGTTCGATCCCTTAACAGAGACTTATGGGTTATCATTCTA  
CACTCAGTATTAGACATTTGGCCTGAATATTTCCAAGTTGCGGAGGGACCAAGTGGAGAGATAATGGGATATAATGGGAAAAGCTGAGGGC  
CATGGTGAAGAACTGGCATGGTCACTGAACAGCTTAACTGTAGGGCCAGAATACAGAAGACTAGGGCTTGCTGCAACTTATGAACATTTTAG  
AAGATGTATCTGAGAAGAAAAGG

>Snon-Fatty acid synthase

TCGGAGGAAGACATTGTGCTGACGGGGCTGTCAGGCCCTGCCCGAGTCCGACACCATCGAGGAGTTCGCGCAACAGCTGTTTGACGGCGTGG  
ACCTGGTACCAGATGATAGACGATGGACCCAGGGTTCACGGTCTCCCTGAACGTAATGGCAAGCTCAAGGACCTGGCGCACTTCGACGC  
GACGTTCTTCGGCTCACGCAAGCCATGACAGTGCATTTGAAATGGAGAGCGCGATCCCGACCCGTGTGTTCTCGGGCATGGACCCCG  
GCATCAACCCAGCAGCTCCGCGGCTCGCGCACCGGCGTTCTGTGGGGTGTCCAACTCTGAGACCAGGAGATGTGGACCGTGGACCCCGA  
CAAGATCAATGGTACCGGCTCACGGGCTGCTCGCGGCCATGTTCCCTAACCGCATCTCCACACCTTCGACCTCAAGGGACCGTCTTCGCAG  
TGGACACCGCCTGCTCCAGTCCATGTTGCGCTGGCGCAGGCTGCCACGGCCATTGCTCCGGCCAAATGTGACGCTGCCATCGTGGCCGGTGC  
AACCTGTGCTGAAGCTGCAATTTCGTTAATTCCACGGCTCAGCATGCTGTCCGCGAGGGCGCTGTGCGCCGCTTCGACGCCAGGGGGC  
CGGCTACGTGCGTCCGAGGCGGCTGGCCTGCTGTCAGAAAACCCCAACCCTGACATCCACGCGTCAACGACGGCCGATCCAGG  
CAACCCAGCGCCCAAGGACAGGGCATACCTTCCGTCGGGGACATGCAGCGCCCTGGCCGAGGAGACCTTCGCCGAGGCCAAGCT  
GCGGCCAGCGACTGCGCTACGTCGAAAGCGCACGGCACCAAGGTTGGGAGACCCCAAGAGGTGAATGCCATCGCGGAGCTGTTCTG  
CAAGGGTCGAAGGGGCGCTGCTTCTGGGTGGTGAATCAACATGGGCCACTCGGAGCCGCGTCCGGCCTGTGCTCCGTCGTAAAGTG  
GTGGTTCCATGGAGCGCGCATATCCCAACCACTTGCATACAAAAACCCCAACCCTGACATCCACGCGTCAACGACGGCCGATCCAGG  
TGGTTGACCGCAACGCCGTGGACGGCGGCTGGTGGCCATCAACTGTTTCGGTTCGGCGGCCAACGCGCACGCCATCTTCGAGTTCGGA  
GCCGGGGCGGGCCGGCCGGCCCCGGCGCGGTACGCGGTGCCCGCGCTGCTGTGGCTCGGCGCCACCGAGCAGGCCGTGCGCGAGCT  
CACGGAGCTGGCGGGCGCACACGACGACGCGGCTGCATGCGTGTGACGCGAGTACATCGGGCAACATCCCGGCCACTTCGACCGG  
GGTTCGTCTGCTCAGCAGTCCGCCATGCAGTGCATTTGAAATGGAGAGCGCGATCCCGACCCGTGTGTTCTCGGGCATGG  
GCTCGCAATGGCCGGCATGGCCAAAGACCCTGATGCGGTTGCCGGCTTCGCAGCTAGCATCAATCGCTCGCGCGGCGGCTGAGGCCGACAA  
CCTCGACCTCAACAATCATCACGACGCCCGGCGTTCGGCTTCGACGATGTCGTCAACTCGTTGTTCCATCGCGGGCGTGAGGTTCGCGC  
TCGTGGACGTTGCTGCTCAGAGATCCACCCGACGGCATCGTGGGCCACTCGTTCGGCGAGATCGGGTGCGCGTACCGACGAGAGC  
GACGGCGGACAGGCCGTGCTGGCGGCTACTGGCGAGGGCCGAGCAGCTGGAGCCCAAGCTGGCGCCGGCGCCATGGCGCCGTTGGGGCT  
GTCTGGAGCAGCTGCGGCGGCTGCCCGCGAGCTGTCGCGGCTGCCACAACGCAACGACAGCTCAAGATTTAGGGCCAGTAGAG  
TCGCTGGAGAAGTTCGTGGGATGCTGTGCGGGAGGGCACGTTCCGCGCGCGCTCAACAGTTCCGGCTGGCCTTCCACAGCAAGTACATCG  
CCGCCCCGCGCGCTGTTGCGCGCTGCTGGAGAAGGTCATCAGGACCCCAAGCCGCGCTCAAGCGCTGGTGTCTCTGCTGCTGCCCG  
CGCAAGTGGGACTCAGATCTCGTAAACTGAGCGACGCCAATACCAGTGAACAACTGTGTCGCGGTTGGGTTCCGCCGACGCCTTGGC  
GAGTGGCCTGCTGCTGCCGCTGTTGGTGGAGGTTGGCGCCGCTGCTGAGCGGGTCTGAAGCGGCGCCCTGAGCGCGCCGCGCGC  
ACGTGCCGCTGCTGCGCCGATGGCCCGACGCGGCTGCACGTGCTGGCGGCGGCGGCCGCTGTTCCGCGCGGCGCGCACGCTGCCGT  
GGCGCGGTGTACCCACCGTGCCCTTCCCGTGCCAAGGGGACGCGGGGGTGGCTCGCACGTGCAATGGGACCACCGCTGGAGTTGGCAG  
GTGGCGCACTTCGCAACGCGTCCGGTTTCGGGGAGAACGTCATCGATACGAGCTGTGCGCAACGACGACAGCTTATCACGGACACAACA  
TCGAGTGGAGTACGTCTTCCGCGCCACCGGGTACCTGACCTGCTTTGGAGAACTTGGCGAAGCTCAACAACGAAAGCTGAGGAGCC  
GATCGTATGGAGAATCCAGTTCGGCGCGCCACCATCGTATCGCGCGACACGCGGTGCGTTCCTTATCAACGTTGTTGACGGCACCGG  
GAGTTGACGTGTGCGAGGGCGGCGGCTGCTGTTACAGGACCGTGCCTTGGCCAGCACCCGCCGCGCCTGCGGGACTGGACT  
CGGCGCGCGGGCCCGGAGGACGGCTGCTGCCGCTGTCACCGACGACATCAACAGGAGCTGCGCTGCGTGGCTACAACCTACGGCGGAT  
TTCGGCATCATCGCGGTGACACGCGGAGTGTACCTGCCACGCGGTGACAGCGCGCTCAACGACCCGCGCGCTACGACCCGGCCGAGTGGCGGGTGG  
ACAAGTGGGCGAGGGCGGACGCTGCCAGTGGCATGTACCGCGACATCGAGCTACAGCGTGGCGGTATCGAATTCGGCGGCTCAAGAC  
CAGCTTGCAACGCGCGGTTGCCAACCGCAGGCGCGCCAAGCTGGAGAAGATGTGTTCTGCCGATGACAACGCGCCGCTGGGTACCGGAG  
GACACTCGCGCTCAACCGCGACGCGTCCACGCTAGTCTACAGTGTCTGAGAGAACGCGGGGGGCTCAAGCTCAAGTACCCGAGGGCGG  
CGCTGGAGCGCGGCGGCGGCTGCTCAACCGCTGCAAGCTGCAGTGTGCAGGCTGACGCGCGCAGCCCAAGTGGAGCGCCGCGCGCTG  
CGGGCCCGCGCGCCGCTACGCGCCGCGTCAAGGAGTGGGGTGAAGGTGCTGCCCAAGGACGGGAAGAGCGCGCCATCGAGAGTGA  
CTGCCACTGGTGTGCGGCGGACGTGCTGAGCCGCGACGTTGCCCGCTGCTGGAGAACTGGCCGCGCGCTGGGCGAGACCGGATGATC  
CTATTGGAGGAGCCGACAAGGCGTGGACGACCCTCGCGCAGGATATGGTGGAGCGCGCGGCTGCTGGTGTGTCGCGCAAGTGGCCG  
CCAGTTCGAGTACGTGTTCCGCGCCGCGGTTGTGCGCGCGGACCGTGGTGGTGGAGCTGGCGGACGACACGACCTTCGCGTTGGG  
GGACACCTGCGGAGGCGCTGGCTTGGCGGAGCACGAGGACATGCGAGTGTACTGCGTGGCGCGCTGCGGGGCTGCGCTGCTGGGGCT  
GTGACGTTGCTGCGGGCGAGCCGGGCGAGCGCGCTCCGCTGCTACTTCCGCGCGCGCGGAGTCTTCGGCCCGACGCGCGCGG  
TACGCGGCGCAGGTTCCGGCGCAGCTGGCGTCAACGCTGCTGCGCGCGGCTGTTGGGGAGTACCGGCACGTTGCTGGCGAGCCG  
AGGCCAGTACAGTGGAGCAGCCTACGTGAACAGCTGACCCGCGGACCTGCTCCCTGCGTGGATCGAGTCTCCACTGCGGTTACGC  
GCTGGAGTGGCGAGCGGGCGGCGGAGTGTGCCGCTGTAAGTGGCGCGCTTAACTTCGCGGACATCATGTGCGCAACGCAAGCTG  
CCGCCCCAGCGCTGCGCGCAACCTCGCCGACAGGAGTGTATCTCCGGCTTAGAGTTACGCGGGGCTTCATCTAACGGCAAGCGGCTATGG  
GTATGGTGGCGGCTGCGGCTGGCAGCACCGTGTGCGGCAAGGGCTTCTGTGGAGGTTGCCCGCAGTGGTCTGAGGAGGCGGTC  
CACAGTCCCGTGGCTACGCCACCGCTACTACCGCTGAGTGTGCGGGGCCGATCGGGGCCGAGACGCGGCTGTGGTGCACGCGGCCAG  
GGCGGCGTGGGCGAGGCGCGTGGCCATCGCGCTGCACGCGGCTGACCCTTACCACCGGTTGGGACCGGACGACAGACCTTCGCTCC  
GCCAGGCTTCCCAACGCTGCGCGCCGAGAATCGGCAACTCGCGGACACGCTTCCGAGCAGCTCGTAAGCGCGCACCCGCGGCGCGG  
CGTGGACTGGTGTCAACTGCTGGCGGCGACAAGCTGCACGCTCCGTGCGCTGCTGGCCGAGGCGGGGCGCTTCTGAGATCGGAAA  
CTGGACTGTCAACGACACGCCCTGGGATGTCCGTGTTCTCAAGAACCACCGTTCACGGCATCTGCTGGACGCTTGTTCGACGCGGA  
CTCTCAGACGGCGAGAGCGCGTGGTGGCTGCGTGCAGTTGGCATTGCATCGGCGGGCGGCGCGTGGCGGCGCCGAGCGCGCGCTTC  
GACCACAGCTGGAGCAGGCTTCCGGTACATGGCGACGGGAAAGCACATCGGCAAGGTTGGTGTACGAGTGCAGAGGAGGCGGGCGGCG  
GCGCGGCGGCCAGCAAGTGTGTGCGCATCCCGCGACCTACATGCACCCGCAAGAGCTACGTGCTAGTGGTGGTATGGCGGGTTCG  
GGCTGAGCTGGCGCACTGGATGGTGAAGCGGGCGCGCACGGCTGGTACTGAACCTCCGCGAGCGGGTGGCGACGGGCTACCAGGCTGTT

GCCTGCGGCGTGGCGCGAGGCGGGAGTCCAGGTTGCGCGTGTCCACGGCCGACGCCGCTCGCCGCGGCGGGGCCCGCCCTGTGCGGGAGG  
CGGCGCGCTGGGCGGTGTTCAATCTGGCCCGCTGCTGCGGAGCCTCTTGACAAGCAGACGCCGCGGACTTCCAGGT  
CGTCCCAAGCCCAAGATCGGACTACTAAGATACTGATGCGCGGACGCGTGGAGTGGCAACCTTCCGCGATCAAGGACCCGAGCAAGGTTCCGACTCCGCCAA  
GTGTATGCGGCGCGGCAACCCCGCCAGAGCAACTACGGGCTGCCAACTCCGCTATGGAGCGCATTGTGGAGCAGCGCCAGGCCGACGGA  
CTGCCGCGCTGGCCGTGACGTGGGAGGCCATCGGCGAGTGGGGCTCATCTGAGAGACCATGGGGGCGACGAGACCGTGGTGGGCGGCACG  
GTGCGCAGCGCATCGGCTGTCATGGAGGCGTGGGACGCTGTGCGGCTGCCGATGGGTTGGCGGCTCCATGGTGTGGCCGACAAGC  
GCCGACTGCGCGCGCCAGCAGGACTGCTGCACGCTGTGCGCAACATTTCTCGGCATCAAGGACCCGAGCAAGGTTCCGACTCCGCCAA  
CTTGGCCGAGTGGCATGGACTGCTCATGGGCGCGGAGATCAAGCAGACGCTAGAGCGCGGCTACGATGTGGTGTGGGCGTGACGAGGCTGACGAGTGCAC  
CGCGCCCTAACGTCTTCCAAGTGTGCGGCACTGGGCGCGGGAGGACGCCGCGCGCCGCGGACTCGGCCGCGCCGACGCCAGCAGCGGAGCAC  
GACCAGGCGCAGTTTCGCGCGCTGGCGAGTCAATGCCCAAGCAGGTGCTGTGTAAGTGTCCAGCGCGCGGCCCGCGGCTCCGACGTTGCCG  
CGGTGTTATGGTGCACCCCATCGAGGCGTGGTAGTGTGCGCGGCTGGGCGGCGGTTCCCGGCGCGGCTGTACGAGGCTGACAGTGCAC  
GAGGCGGCTCCGCTGGACAGCATGACGTCACTGGGCGCGCACTACGTACGCAAGTCCGAGCGTGCAGCCCAAGGCCCTATACACTTGTG  
GGTACTCTTTCGGCGCGGCTGCGCTTCCGAGATGGCCCTGCAGTACGAGACGGCCGCTGCGAGACCGGCTGGTGTGGTGGACGGTCTAC  
CGGCCTACGTGGCCACGACACCACGCGCGCAAGAAAGAAACGCAGCACGGCTCCGCGGAGACCAGCAGGGCGACCGCTCGGTAATTCC  
TACAGTGTTCAGGACGTCGACGCTTCCAAGTGTGCTGGAGTGGAGCGGCTGCCGAGCTGGGAGGCGCGCTGGTTCGACCACGGAGCT  
GGTGGCCAGCGCCGAGCCGCGCCGAGCCCTGCGCCGCGGACTCCTTCTACGCCAAGTGTGTTCCAGGAGTGGTTCAGGAGCTCACAA  
CGGCCGCGGCTGCGAGCGCCGTCACGCTGTTACGGCGCGCAACTACGTGACGCTGGGCGAGGACTACGGGCTGCGGAGGTTGTGTG  
CGGCCCGCTGACAGCGCAACAGTGGCCGCGACTCACCGACCATCTCTGGAGGCGCGCGGCGGCCATCGCCGACCCTGTCGCAC

>Snon-Fatty-acyl CoA reductase 1

ATGGGCTTCTAGAAGATCGAGATCTAAGTGGCGTGCCTAGTATACCTGAATCTATAAAGAAAACAGTATTCATTAAGTGGCGTTCTGGT  
TATGGGAAAAGTCTGATAGAGAAGTGTACTCTGTCAGATCTTGACAGAATCTACCTTCTTCTGAGGAACAAGAAGAAGCTGAAGTCTG  
AAGACAGATTAGCTCAGTTGTTTCTTCAATATGTTTCGACAGACTTCGCAAAGAAAGGCCGATTCCAATCAAAAAGTGTGTCATAGCTGGA  
GATGTTTAGAAAATGGTTTAGGATATCTGAGGAAGATCTGCTCTGATTTGCAATCTGTTGAACATCGTGTGAACATCGTCTCCACGTTGCTGTACGCTAC  
ATTTGATGATCCCTTGAAGATGCTGTGCGAATGAATCTTAGAGGCAGAAAGGAGTGGTGAACCTCGCCACGACATCAGGAATTTAAATGCC  
TTCTCCACGTTCAACTCTACTCCAAACATAACAGAGATCTATAGACGATCTTGATAGAGGACTGTTACCCCTCATGCTGACTGAGGGACACCTTGA  
AGTGTGCGAGAAAACCGATCCACATGTTTGAAGTGTGACACCAAGTATCTAGGAGAGCTGCCGAATACATATACGTTTACAAAAGCAGTTG  
GCTGAAAACGATAGTGGCCGAGTATAAGGGAATACTGCCATTGTCATCATAGACCTCCATAGTCAATCAAGTGTGGAGGAGCCAGTTCCAG  
GATGGGTAGAGAATCAACGGTCTGTGGTGTATGGCAGCTACAGGAAAGGCATCATGCGCAGCTTACACGGATCCAAATCTGATAGC  
TGACTACATGCCAGTGCATATAGCTATCAAGAGCTTATAGTACGATCTTGATGGCAACGAGGAACTAAAGAACTGTSTCAACAGCACACCGTCA  
ATATATAACTGCTGTGCTGGCAAGTTGAACAATAAACCATGGGTGAGGTGATCGCTTAGGCAGACAGATTAGCCCCATCGCGCCTCTCAATG  
GTGCCCTGTGGTTTCCTGGAGGGGATACCAAAATTTGGAAGAATCTGCATTATACAAAGTCTACTGCTCAATTTGCTGCCTGTATCTGGTA  
GACTCTTCTGTGGGCAATTCGGCAGAAAACATGCTGATCAAAAATCCAACCGCCATCTACATAGCGAAYTTGCCCTCGAGTACTACRTAC  
CAAGCAGTGGACTTTTGACAAACAATAACTGGTACTCCTGTTCAAGAACTTAGAAAACGACATGAAACAATGAAAACAGTGGAGTCAAGAA  
GTTGATAAATACCGTTTTTTGTAACGCGAGCTTGGAGGAAAGAAATTTTTATTGAAAAGAAAAGGATGAAAGTCTTCCAAAGGCTAAGCGTC  
ATCATAAAAGATGCTGATCATTGACACGGTGGTGAATACTCTTCTACGGTACCTGTTCTGGTGGTCTTCTGAATCTGCAATTCATAAAAAA  
ATTATTTAATAAGTAATAATTTCTCAAT

>Snon-Fatty-acyl CoA reductase 2

ATGAGCCAGTACACTTTGGATGAGTCCCCACTGATAGTACTCCTAAAACTGCGAAAAAGATGGAGAAGTGGGTCAAAGCCAGGTTAAGGGCG  
AGAAGACAGACATTTGATGCTACGGCAAGCCACAGATCAGATGCTCAAAGAACTCGAGAATGTGAGGGGTCTCAGCAAAGAGCTACAGGACA  
ATCTGCAGGAAGTAAAGAACTCAGTCCGATAGCAGAAGTAAAGAAACCAAGCGATGAACCCACAGCCCTATCTGGACTTCTCCGAGAGCCA  
CGAGTTCGTCCCGGACACCGCGACACCTATTACGAGAGGAGGACAAGTGAAGTCCGAAGGAAAGAAAGAAAGAAACTTACAAAAGGGTA  
AAGCGCCAAAGACTGAGATTCAGGATTTCTATAGAGATCAGTGTGTGTTACTGTTGGAATTTGAAAGCCAGTCACTGATAGAAA  
GTTGATACGATCTGTGGAGATGTTCAACACAATAATATATTGATAAGAGGCAAGAAAGGAAAAGACCCGACGGTGCCTGCATGAAATATTG  
GATGAATCTGTTTCAAAGAGCACATGAAGAGAATCCAAAGGGCATAACAAGTGTATCCAACTCGTGGGAGATATGCAACTACCAGGGTGG  
GCATCAGTGACGAAGATAGGAAGATGTCAACAACAGGTAACAATAAATCAACGAGCGGCTACAGTCAAGTTTGTATGAGAAAAGCTGAC  
TTCTGACTGTCAACGTTCAAGGGACTAAGGAAGTTGTAAAATTTGCTAAAAGATTGCAGGAAATTTGAAAGCCAGTCACTGATGACCCG  
CTTTTCTAATACGCAAGTAAACATATTGAGGAAAAGTTCTACGAGCCCCATTTTCAGCGGAAGCATTGGAAAGCCATATCAGAAAATAGATGAT  
AAAATTTGAAAAGATTGTCACAACGTTCTAGGAAAAGAGCCCTAACAGTATTGCTTACGAAGGCATAGCAGAGGAGGCTGTTCCAAAAT  
ATGGAGAGGGTCTACCGATATGATCTCCGACCTCCATAGTTGTTGTCCACTTACGAAGAACCTGTACGAGGAGTACTGACAGCGCTATGGA  
CCGACGGGACTGGTGGTCCGACTCGCCACTGGGTTCTACGCAACATGTATGACGAGAAGAAAGTAGCAGACATGGTCCCGGAGTGTG  
GCGTAAATGCTATCCTCGCTCCGCTGGTTCACTGCCAAGAAATTACAAGAGAAATCAAACATCTGTATTTCCGATCACAACCTCGTGTGGA  
GCGCAGAACCCCTCAACTTGGGAGACTTCATTGAAGTAAACCGAGAWATGGTATGCAAAAACCCACCACAAGGCTGTTGGTACTACGGTT  
TGAACCCACGAACAATATTATGTCTTGTCTACAACCTTCTTACATATCTGCCCGCTGTTGTGGGACATGACTGCGCCATCAGCG  
GGAAAAGACGAGGATGTGAAAAGTGAACAACAAGTAAAGAAATTTGCAACATTTCTGTCTACTTCTGACCCAAAGACTGGAAGTTTTCAGA  
CAAGAACCGTCAAAATATGTGGATCTCACTAACAAGTATGAAACCGGTTGTTCCCTTTAGCATAGGTAAGTGCCTCGTCAGGAGGCTGCGG  
AAACATTCCTACTTGGTATCAGAGTGTACCTCATCAAGGATGACCTTCCAGTACCTGAAAGCCAGGAAGAAGTGAACAAGCTGTATTACCTG  
CATCAGGCGTAAAGCTCTCACCATAGTTCTAGTGTAAACTTGGCATATTTTGTGCTAAAAGCTGTGTTCTCGCTTCTGCT

>Snon-Fatty-acyl CoA reductase 3

ATGGCGGACAGACTATGTCCAACCGGAGCGCGACGCGTGTCCGACAGGATAGCGGACACCTTCTCAGGCCTAAAGTCTCTATAACTGGAG  
GAACTGGCTTATGGGAAGGTGCTACTCGAGAAAGTGTCTAGAAAATGTCCGGACATCGATCAGATTCTTCTCTCGTGGAGCAAAGAAGGG  
CAAGAACCGAAACAGAGACTGGAAGAGATCTCAGTGGAGTCTTCCGACAGGTCCGCGCAATGAGAGGAGGCGTTGAGCCTCTGCTGGA  
GAAGGTGACCCTCGTGAACGGTGACGTCTCAGA

>Snon-Fatty-acyl CoA reductase 4

ATGGCGCCMTAGTGAATATATCTGAGTACTATGCCGTAATAACGCTGTTTCATGACCGGAGCGACTGGTTTCATGGGTAAAAGTATGGTGGAGA  
AGCTTCTAAGATGCTGCCCTGACATCAAGAAGATGTATCTACTCATGAGGCCAAAGAAAGGCCACAATAGTAAAGAACGACTGGATGACTGTT  
GAGTTATCGGATCTCGATCGTGTGAAAGCAGAGTCTCCGAAAGCTTCTCGACAAGTACAGGTAGTAGCCGGAGACATTTCTGTCCCGGACTG  
GAGTGTGACGAGGATCGAGCGCTCATTCAGAAGCAGGACAGATTAATCTTCCATTGTGTCTGCTGCGTCAAGTTCGACATGTTTCTCCGGAT  
GCTGTCAAAATGAAACACAGCGGGGACCAAGAAAGTATGAAACTGGCTGAAGGAGTGAAGAAATTAAGTGTCTGCTCCGCTTCAGCTCAT  
ACTGCCGCTGCGAGCTGGAGCTTTTGAAGAGAAGCTGTACCCGTCCAAGCACCGGCCCAACACGTAATGGAGTGGCTCGGCTGGATGGA  
CGAGCTGTGACGACATGACGCTAAGATAATTTAGCGCCGAGCMAAYACATACGCTAYACAAAAGTCTCTCACAGAAGATCTCGTGTACAG  
TATGAGGGGAAAGTTCCCATAGTGGTTCGCGCGGCTATCTATGCTGGCAGCCTACAAGGAGCCTAGCTGGATGGGTGGACAATTTGAACG  
GACCTACTGGAACTATTAGTAGAGCAGGCAAGGTTGATCCTGATCCTGCACTGCAACGAAAATTAAGTGTCTGCTGACGTGGTGTCTGACGCT  
GGCAGTCAACGCTGCATCCTGGGATACCTCAGGCTGTGCAACAACCCAAAAGATACACTACTGCAACATAACTCAGTCAAGAAATCAAT  
CCGATCAGTGGGGACAAGTCTTTGGACATGGGCGGGTTCACGTCCAAGAGTTCCTGTTACCGTCTGCTTGTGTTACCCCGCGGCTCCCGGA  
GAGCTCGTGGATAGCGCACCAGCTGGCGATGTTCTTCACTACAGTGTCCGCGTCTCTTGGTATGCTCATGTCTCTATGGGAAGAAGA

CTTTCATGATTAATAAATCCAGAAGCGAATCAACTACGGCTCGGAAATTTCTGCAGTACTACACGACCAAGGAATGGCACTTCACAAATGACAACCT  
YGTGGCGTCCAGCAGAGGATCTCCAAGAGTGACAACCAACGTTTTACACTGATATGAAGGACATGGACTGGAGCATGTACATCAGGAAGCTAC  
ATCAAGGGGGCTCGGAGTACTGCTGCAAGAAGACCCCGCCACTCTACCCGACGCCAGGAAATTACAGAAAACAAATTAATACTATCTCGACAAA  
CAGTACAGATTATGATCGGTTTATTAGTATCATATTTCCGCTACTACTATTTTAATATGCTATACTCTGTGATAAGCTCA

>Snon-Fatty-acyl CoA reductase 5

ATGGGTGAACACAGCTGATTTCCGTCAGTGAAGCCATCGGCGAAAATTTAATGAAAGAAATAAATATTGTGCCGAGTGCATCGATAGTGCAG  
ACGAGAATATGAACAATAAATATGACAATATGACGGATGTCCAGAAGTTTATAATGGGAAGAATAATTCTGATCACTGGCGCTACAGGTTTTCT  
CGGCAAGATCCTAGTGGAGAAGCTTCTCCGGTGTGCCAGGCGTGGAACCTGTACTCTTGTGCGCAGAGAAGAGGGGGRAGGACATTTAC  
AGTAGGATTGAAGAAATCTTTGATGACCTGTGTTCAATCAGCTAAAGGGAAGAGGTGCCGAAGTTCCGGCACAAAGTTGTTGGTGTGCCAGCAG  
ACTGCGAAGTGTGACTTGGCCTCACCTAACTGATAGGCGAGATGCTGACTGAGAAGGTGAACATAATCTTCCATTCGGCTGCGACAGTCAA  
GTTGATGAACATCTCCGAGCGCCCTGGCGACCAACCTGACAGGCTCTCCACCTCAGACTGGTCTAGGACATGAAGAAATTAGACGTA  
CTAATGCACATATCGAGCGACATCGAACTCAGCTGTCCGAAATCGAGGAGGTTTATCCATGTGACCTGATTTGTAACAGTCACGC  
AGATGATTGACAAGCTCTGTGATAAGCAGATCAATAAAATGTTACGAAAATCCTAGGACCATGGCCAAACAGTACACATTCACAAAAGCCTT  
AGCGGAGAAAGAAATYTCGAGTGGTGWCGGGAGGCATGCCTATAGGTATATTCAGGCCGCTATAGTACTATCGACAGCGAAGGAACTTTAAA  
GGGATGGCTGGACAAATGATAGGACCCACCGAGTCACCGTTGGCAGYGCCACCGGCATCTACGACGGTTTTCAGTGCAGCAACTGGTGTCA  
GCAGACGTAGGATTAATACTGTAAACAGTGAACAGCAGAGGCTTTGGGAGAAATAGTGTACAAATGTGATAAAGCAGAAATATTCCACCGCAG  
AACCTCCGATCTTCAATTACGTCAGTTTTCAGTGGAGAACAGGATAACGTGGGGCGATTTTCAAGCACAAAATATGCAATGGATACATCACTACCC  
CTTCTCTCAGGCTGTGTGGTACTTTTCATAAAGGCTGACGAAATCGGTGCTCATCTACAAAATCTACAAGTTACTCTTGACCTAAATACCCCGACG  
GTTGGTCGACGGCTTAGCTGTCTGTTAGGGAAAAGCAAAGATGCTAAAGGTATACCGTAAGATACACAAGTTCTCATCAGTCTGTCTGACT  
TCTGCACGAGGATTAATACTGTAAACAGTGAACAGCAGAGGCTTTGGGAGAAATAGCTCTGAAGCCGATAAAGCAGAAATATTCCACCGCAGC  
GAGCGACATAAAGTTGGGAGGGGATTTCCAGGACTATCTGGCTGGCATCAGGAGGTTCTCTTCAAGGAGAGCGATGACACACTACCGACAGCC  
AGGATTAAGTGAAAAGATTGTTCTATCTGCATCAGATAGCAGATTCTTTCTCTCATCTGGCGGCTACGCTCTATGGCGGATTTTATCTTCA  
CTATGG

>Snon-Fatty-acyl CoA reductase 6

ATGGTACTCTGTCAGTGTCCCCGAGTCCCGGAGCCTGCTGCCCGATTCTACGCGGGAGGTTCCATACTCATCACTGGAGCAACCGGGTT  
CATGGCAAGGTGTTGGTCGAACGCATCCTATCGAGTGTCTGAGGTTGGACGCTCTACTTGTCTATGAGGATAAGAAGGGGACTCGCCC  
CAGAAGAGGCTGGCACAACCAAGCAGTCACAGGTATTGACAAGTTCGCGCTCGTAACCACCGGCAGCTGGACAAAGTGTTCGCGGTACGCG  
GAGATGTTCCAAGCCCATCTAGGCTGGTACTGAGGCGCTTTTACAGCTTAGAGAGGTGCCATAGTGTTCATTACGCGCTACTCTGAAG  
TYYGATGAACCACCTACGGGTGCGGTCATTGATCAGAAATGTTCTGTTGTCGAAAAGACTCTGGAATAATGTGATAAAGCAGAAATATTGCGGCTT  
CATAACAGTATCRACAGCGTACAGTAACCGTGAAGTACATGCGTAGAAGAGCGCGTGTATCTCCGCTGTACCCCTGGAACAAGCCTTACCG  
TCGCTGACTTTCTGCCGGAGGAATGCTTGCAAGATCAGCACAGAAATACATCTCTCGAAACCTAACACCTACACATTCAGGAAGGTTTGGCG  
GAGAATGATGTCGAAGAACAATGAAATAAAGGATAYCCSSTGSCCATTTTACACCAACTATCGTGATATCATCTCTGCGTCACCCATACCCCTGG  
CTGGATAGAACCACTACCGGCCCGAGCGGCTGTTGGTGGTGCAGGGAGAGACTTCTGCACGTTTCTGTCACGCTGTTTCTGAGGAGGAGCAGT  
GATATGCTGCCAGTTGATAATTGCCATTGATACTCTGTTGGCTGTAGCGTGGGAGACCGCCGTTGGACCGGCCAGAGCAAGTTTCGAGTGTATAATTG  
CAGTACTTATGAGAATCAACCCTTGGGCTGACTTCGAAGTGCATATGCGCAAAATCTGCGTGGACATCCGCTTGAACAACACATTCTGGTACC  
CCAGCGGCCCTTGTGTTGAAAACAAGGTCACACAAAAGACTTTAGAGACATTACTGAAAAGTGCCTCTTATATCGCCGAATATATACACCAA  
AATCTTTGGAATAAAAACGAGAATGAGCCTCATAACTGTACGCGAGCTCTCAATGACTATGTAATGAGGTGTGTAGATTCTTCTCCGTACGTGAAT  
GGCACTTTACAACGGACAATGTAATAAATAACAGACCTGACGCTCTCGCTCAAGATGCTGACATTAATAATTAGTCCCAAACTATCAATTTGG  
GAAATTCATTATGAAAATTTCTGTAATAGGAACAAGAAAATATCTTTACAAGAGAAGACCAAGACATCGACGTAGCAAAACATTTGCGCA  
AGATGATTACGTGCATCAAGGAGTTTGTGTTCTCGTGATAACCTTCTTTGCGCGATGGCGCTCCAGAACCAATACATAAAAAACCTTTGTTTACC  
GGCGTTTCCAGATGTCTGCTGCAATTTAAGCTCAGCTTACATGCGCATACGACAGAGC

>Snon-Fatty-acyl CoA reductase b

ATGGGCAAGGTGCTGGTGGAGCGTCTGCTGTGGAGTGCCTGCGAGCGTGTGTCGCTGCACCTGCTCTCCGCCACAAGAACAACCTCTCGCCG  
ACAAGAGACTCGCCGAGCTCAAACAATCCAGGTGTCGACGTATCCGAAGGACTGCCCGCAGCAGTGGACAAGCTCAGCATGCTGGCCGG  
GGACGTCACAGGGCAGGCCTCGGCTCGACGATCTATCAGTCAAGCTCAACAGGTGTCGGTGTGTTCCACTCAGCGCGCAGCGCTAAAG  
TTCGACGAGCGCTGTCGGTGGCGGTGGATCAGAACCCTGCGGCCGTTTACTGATGGACATTTGTGACCAGATTTAGTACGCTCACAACATGCAAGTGT  
GCTGCACGTTCTCGACGGCTACAGTAACCGGAGCTGACGACCGTGGAGGAGCGGGTGTACGAGGCGCCGTTGCCGCTGCAGCAGTGTGAG  
CCTCGTGGACGTGCTGCCCGGACCTGCTGGTGTGAGTACGCCCCAGGCTAATATCTCCGAAGCCAAACACATACAGTTACCAAAGCGATG  
GCGGAGTGCAGGCTGGCCGAGCGCGCTGTACCGCCAAGTACGCGACCCGCTTTAGACCAACTATAGTACTTCCCTCCGCAACCCGTT  
CCCGGCTGGATCGAGAACCTGAACGGTCCGTGCGGCGGTTGGTGGCGCCGCCAAGGGCCTCTGCACGTGCTCACTGTAGCGGAGCGCG  
GGCGCTGACATGATGCCCCTGACATCTGTATCGACACGCTGCTGGCCGTTGGCTGGGAGGCGCCGTCGCAACAACGCGAGGTTGCCGCTG  
TACAATGCAGCTCGTGCAGTCAACCCACCGTGGGCACAGTTTCAAGAACAACCTGTGCGCGGGTCCCGCTCACCCCTTCGACAACGTCAT  
GTGGTACCCCTTTGGAATATGCTGCGAGAACCCTGTAATGCGAGAAGTATGCGGACACCCTCCAAACCATCCCCTTACTCATCCACTACG  
TGTCTAAATGTGTGGAATGAAGCCGAGACCGAGTATGTCACCGTGAACAAGCGCTGCAAGCGATGAACGACGCGCTGAAGTACTTCCGCGAC  
CCGTGAGTGGTACTTCAACACGRACAACGCTGTGCCGCTGAAGCAGAGACTGTGCGCGCTGACGCGCCGCTCAACAACCTGGATCTTACAACC  
ATAGATTGGGAGGAACACTGCGTGGACTTCTGTGAAGGAGCTCGCAAGTACTTCTGAGGGAAAAGGATCAGGACATCGAAAAGGCTCAAAGA  
AGAATGCACCTATATATGATCCACAAGGCGGTGAAGTTATAATAAATTTTTGGTTGGGTCGACTAGCGGTACGAACATTTTCTGCCATCAG  
ACGGGATAAAGCAACAGCAATAAGAACA

>Snon-Fatty-acyl CoA reductase II

ATGGGTGAAGCCAAAATATCAAACGTAGCATCCTTTTTACGGGAAAATCTGTTTTATAACTGGCGGTACGGGATTTGTTGAAAGACTTTAAT  
AGAAAAGTTGTTACAGCTGCAATGGGATTGACAAAATTTATGCTCTGGTACGTGATAAGCATGGCAAACAGGCCGAACGACTGGAGGCT  
ATCACTACTTACCAGTTTTGACCGGATAAAAAGAACCAGAAGAGAGTGGAAAAAATACGGTCACTAGTGGGGATATTACTGGAGAGT  
GTTTTGGATTGCCGGTGTATTTTTAAAGTATTTGAGGACGAGGATAGTACTTACTAGCAGCCACAGTTGCAATTCAGCTGCCACTT  
AAAGATGCCATGAGGATAATTTAATGGTACGGAAAATGTAATTAATTTATGATCAGGATGAAAAAATTAAGAGGGTTTTGTGACTGTGCTCGA  
CAGCTTTCTCAACTCAGACCGAAGGGAYATAGATGAAGTGTATACCAAATGCCTATGGGTTTAAAGAACCGCCAGACTTTTTGCTGAAAATGTA  
CTMCATTAATGATGATGTCAGCAAAATTTTTGGGAAAATAAGCCTAATACCTACACTTTTTCAAAGGCGTGTGGGAAAGAACAAGTTATGAAGC  
AATGCAACACTTACCGGACGAATGTGACACCATCTATAGTATACAGCCTAAAAGAGCCTTTTTCTGGATGGATAGACACATGGAACGG  
AATCACAGGATTTCTGTTGGAGTCTTCTGGAAATCTGAAAATGCTGAAAGGTAGAGGCGAGCAATGTGACAGATTTGTTACCAAGGATGATTG  
TAGTGAACCTTATTATAGTTGCTGTACAAAATGTAGAGGTTCAAATAAATTAATAAATAACAAGTGTGTACCGGAGGAAACGAACCCATTAC  
ATGTGATGGAGCGAGTGYATACCAGAAGAGTACGCTTAGGCCTACTAAATGAAATTTCCATGGCCCTTTAATAATTCACCCCTAGGATAT  
TTTTATACAATTTAATACCGTACCCCTCAGATTATACCTGCGTTTCTGATGATTATGGTGTATTTTTAACTGGAAAGAAAGCAATACAAATTA  
AAATACAGAACCGGTAGGAAAGTCGTAGTGAAGTCTTTTTTACTAACCAAGTGGAGTTTCTGTGATAACCAATGGAGAAATGATTTA  
AAAATATGTCTTATGTGGACAAAGAAATGTTAACCCTTTCAGCTGCAATCGATTAACCTGGGAAACCTGTATTAGAGATTACGTTTACGAGCTAG  
GAAACTTGTGAAACATGAGAAA

## Supplementary material S2

**Maximum likelihood tree of candidate chemosensory proteins (CSPs) from *S. nonagrioides* and other Lepidoptera.** Sequences used were from *B. mori* [63], *S. littoralis* [17, 18, 56], *H. melpomene* [58], *H. virescens* [47, 60, 61] and *P. xuthus* [65]. Signal peptide sequences were removed from the data set. Branch support was estimated by approximate likelihood-ratio test (aLRT) (circles: >0.95) [73]. Images were created using the iTOL web server [87]. The SnonCSPs identified in this study are in red.

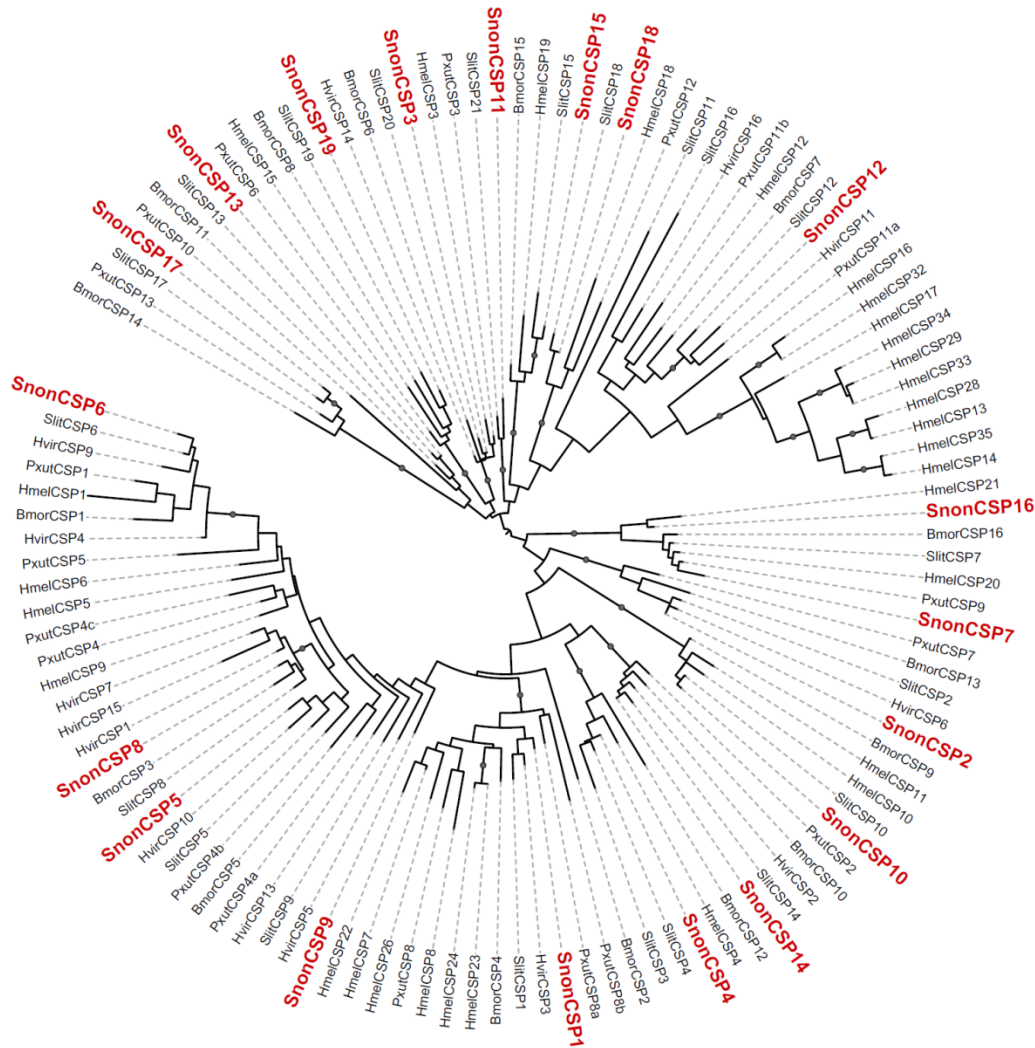

Supplement: ijbsv09p0481s1.pdf [file ijbsv09p0481s1.pdf]
